# Supplementary material for: Large-scale detection and characterization of interchromosomal rearrangements in normozoospermic bulls using massive genotype and phenotype data sets
Source: PubMed Central journal article supplement — Genome Res. 2023 Jun;33(6):957–71. doi: 10.1101/gr.277787.123 (PMC10519396; doi:10.1101/gr.277787.123), 2023-06
Supplement: Supplemental_content.pdf [file Supplemental_content.pdf]

# Large-scale detection and characterization of interchromosomal rearrangements in normozoospermic bulls using massive genotype and phenotype datasets

by Jeanlin Jourdain *et al.*

## Table of contents:

File Supplemental\_Figs.pdf:

|                                                                              |       |
|------------------------------------------------------------------------------|-------|
| Supplemental Figure 1. Information on t(5;28) and bull Fa                    | 1-3   |
| Supplemental Figure 2. Information on t(2;22) and bull Fa                    | 4-6   |
| Supplemental Figure 3. Information on t(10;12) and bull Im                   | 7     |
| Supplemental Figure 4. Information on t(1;11) and bull Ja                    | 8-10  |
| Supplemental Figure 5. Information on t(5;28) and bull Le                    | 11-13 |
| Supplemental Figure 6. Information on t(3;8) and bull Ma                     | 14-18 |
| Supplemental Figure 7. Information on inv ins (4;8) and bull Nt              | 19-24 |
| Supplemental Figure 8. Information on t(12;23) and bull No                   | 25    |
| Supplemental Figure 9. Information on Rob(18;21) and bull Ob                 | 26    |
| Supplemental Figure 10. Information on t(24;29) -der29 and bull Ou           | 27-31 |
| Supplemental Figure 11. Information on t(12;23) and bull Qu                  | 32    |
| Supplemental Figure 12. Information on bull Ra                               | 33    |
| Supplemental Figure 13. Information on t(2;13) and bull Sa                   | 34    |
| Supplemental Figure 14. Distribution of linkage disequilibrium in chromosome | 35    |

File Supplemental\_Tables1-4.pdf:

|                                                                              |   |
|------------------------------------------------------------------------------|---|
| Supplemental Table 1. Raw technical numbers for affected bulls.              | 1 |
| Supplemental Table 2. Number of eligible bull cohorts per breed.             | 1 |
| Supplemental Table 3. Analysis of linkage disequilibrium around breakpoints. | 2 |
| Supplemental Table 4. Repeated regions around breakpoints                    | 2 |

File Supplemental\_Table5.xlsx:

|                                                                          |  |
|--------------------------------------------------------------------------|--|
| Supplemental Table 5. List of genes potentially affected by breakpoints. |  |
|--------------------------------------------------------------------------|--|
