# Supplementary material for: Large-scale detection and characterization of interchromosomal rearrangements in normozoospermic bulls using massive genotype and phenotype data sets
Source: PubMed Central journal article supplement — Genome Res. 2023 Jun;33(6):957–71. doi: 10.1101/gr.277787.123 (PMC10519396; doi:10.1101/gr.277787.123), 2023-06
Supplement: Supplemental_Figs.pdf [file Supplemental_Figs.pdf]

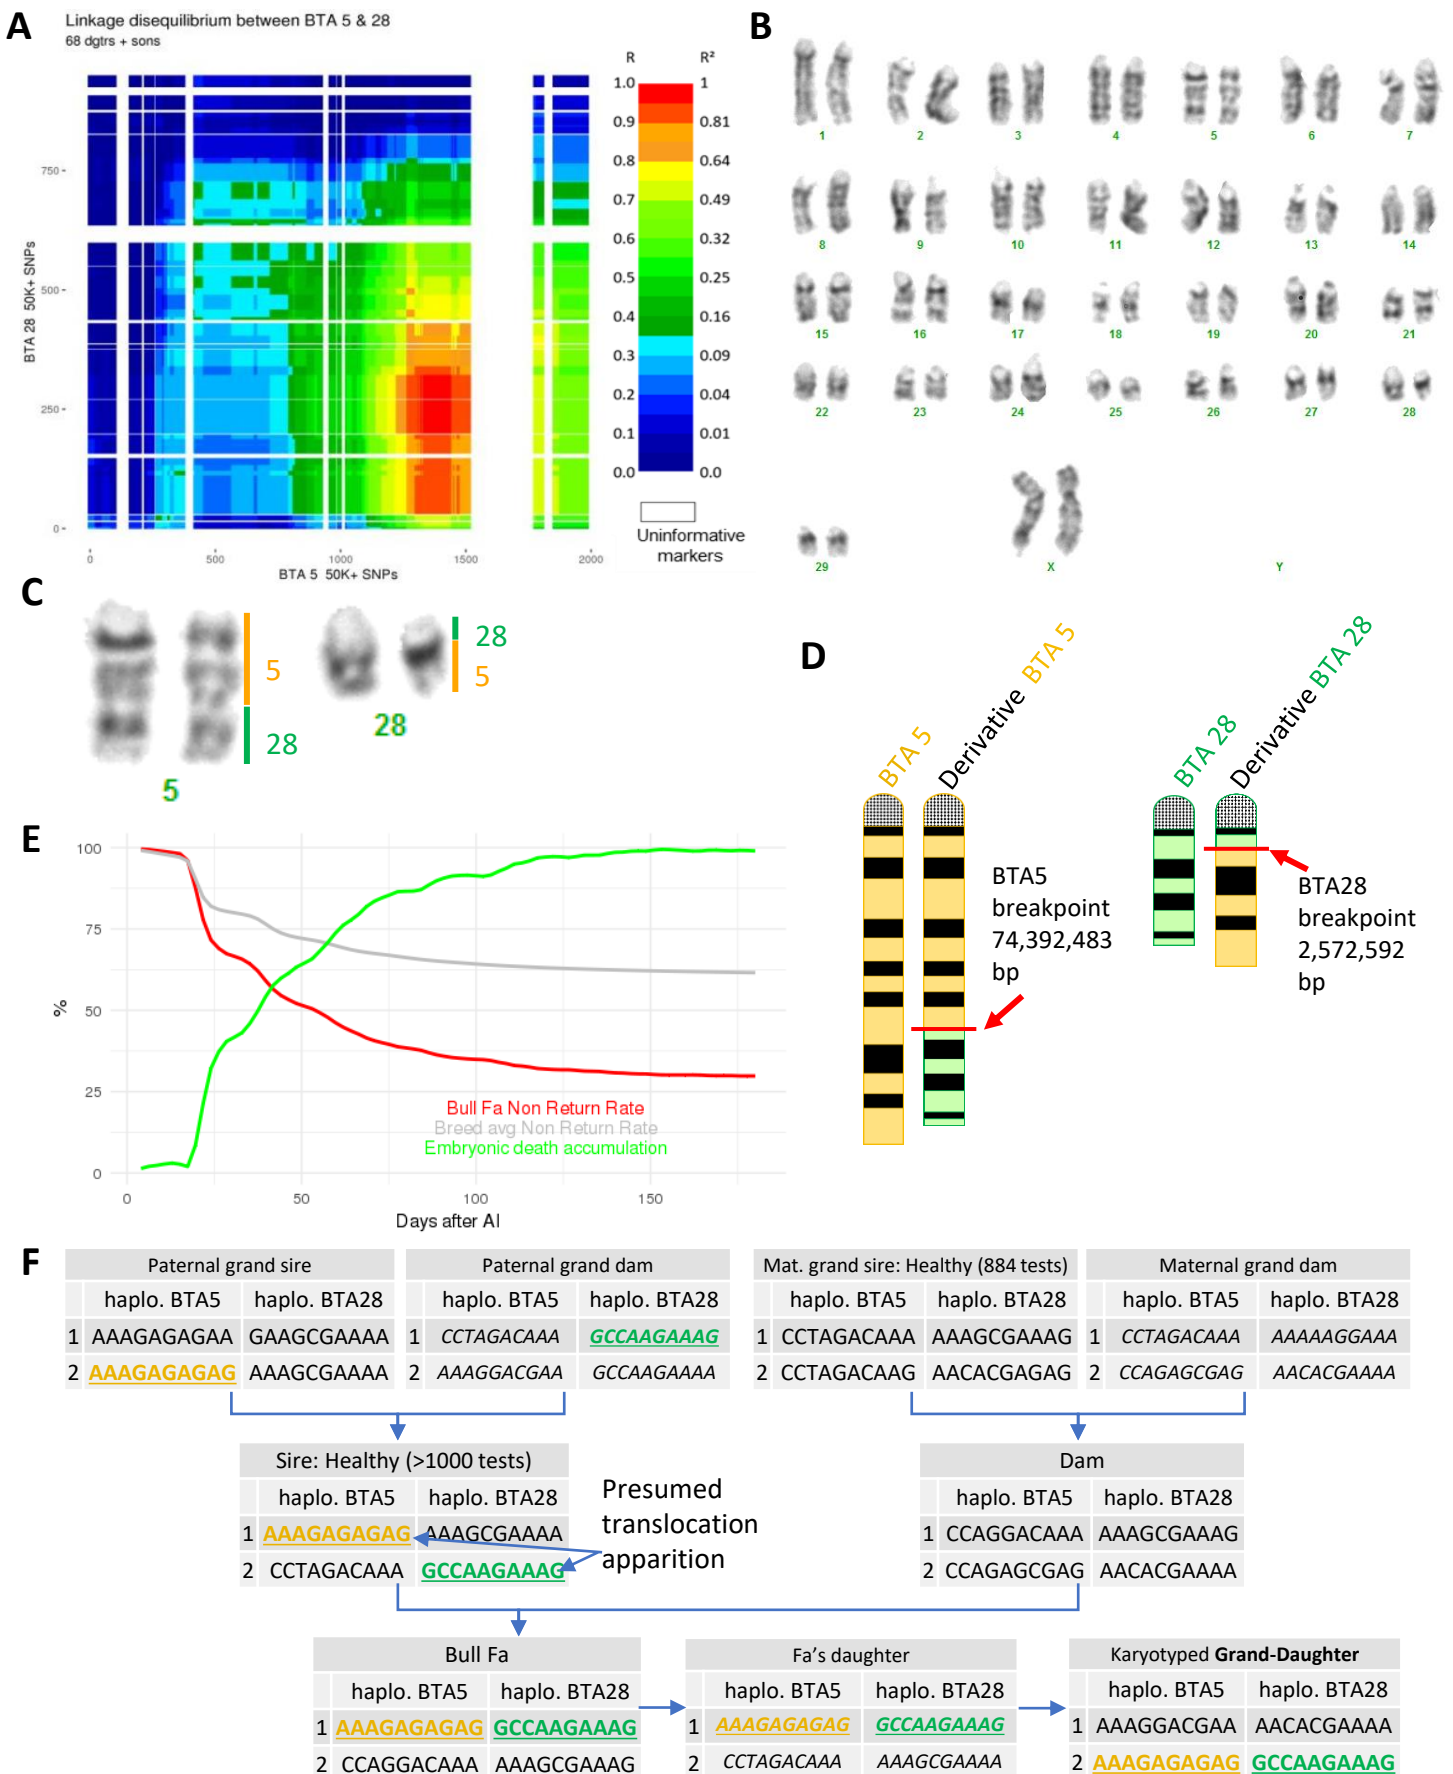

**Supplemental Figure S1. Information on t(5;28) and bull Fa.** (A) Linkage disequilibrium heat map. (B), (C) Complete GTG banding karyotype of an affected granddaughter of Fa and annotated close-up of the rearranged chromosomes. (D) Schematic representation of the rearranged chromosome combining information from cytogenetic analyses and long-read sequencing. (E) Daily non-return rate of inseminations performed with the semen of Fa semen compared to the average non-return rate of the breed. (F) Analysis of the transmission of the segments involved in IR in the pedigree of Fa based on haplotype information. 1) and 2) refer to the paternal and maternal phases, respectively. Haplotypes involved in the rearrangement are shown in bold and underlined. They are colored to match those of the original chromosomes. Italic haplotypes are inferred from the genotypes of relatives. Note that the karyotyped animal is a descendant of a daughter of Fa, which explains why it carries the IR on its maternal phases. Note that bull Fa inherited the two haplotypes in LD with the translocation from its sire, which showed normal LD pattern in our initial screen. We concluded that the bull Fa was the first mutant and that the rearrangement was the result of an abnormal male meiosis.

Breakpoint BTA5:74,392,483 bp

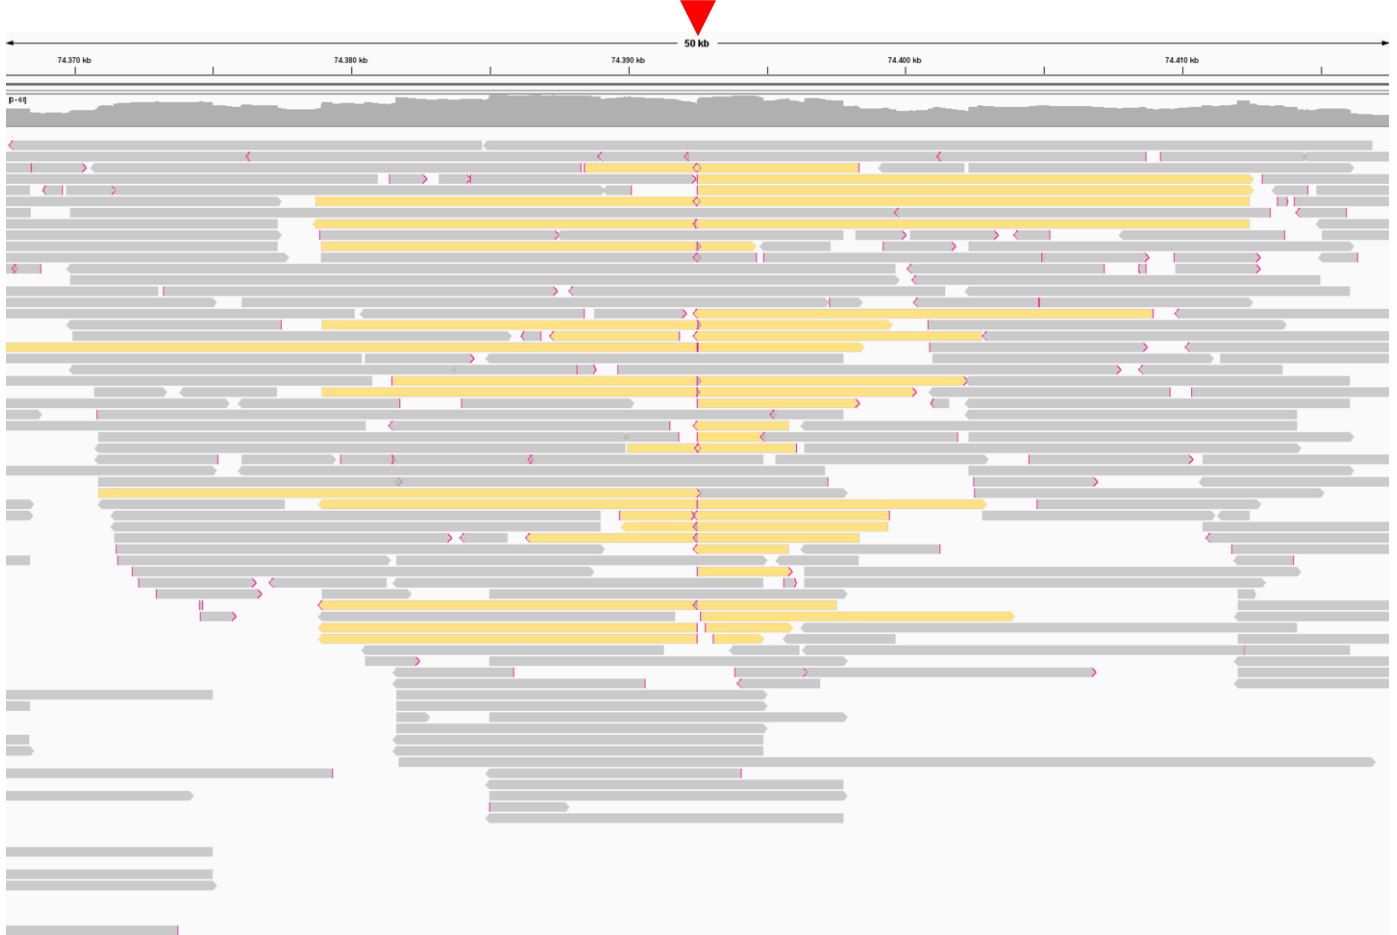

Breakpoint BTA28:2,572,392 bp

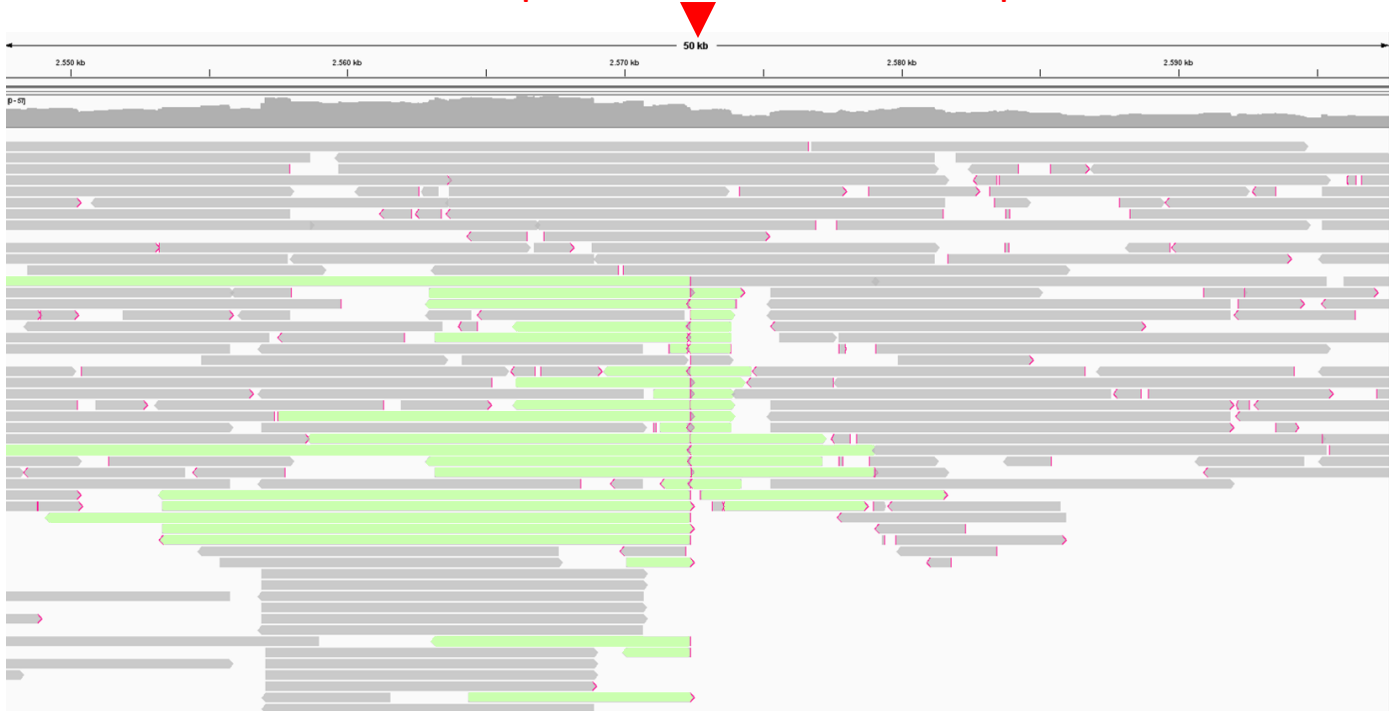

**Supplemental Figure S1 (continued).** (G) IGV screenshot of long read sequence alignments around the breakpoints +/-50kb on BTA5 and BTA28. Reads with partial alignment on the reciprocally translocated chromosome are highlighted in yellow and green.

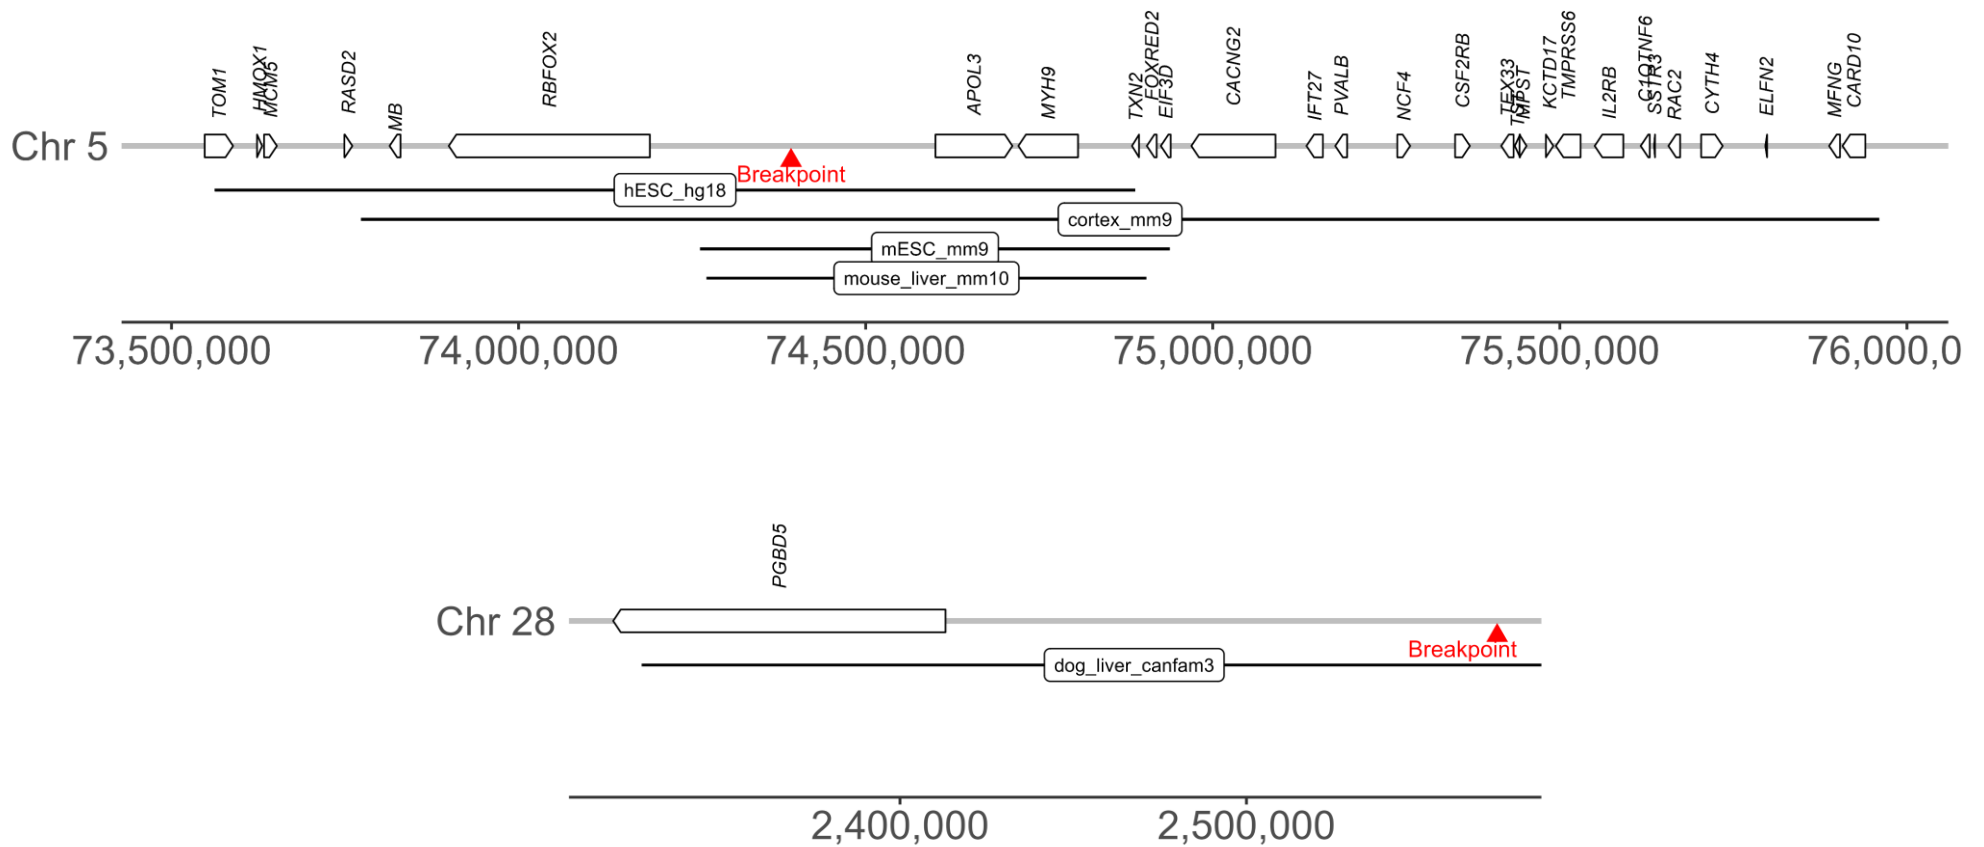

**Supplemental Figure 1 (continued).** (H) Annotated map of the chromosomal regions flanking the breakpoints for t(5;28) in bull Fa. Gene annotation has been obtained using Ensembl Biomart Tool. Information on TAD locations has been determined by orthology comparison with human, mouse and dogs (Wang et al.,2018). The tool liftOver was used to convert the positions of bovine UMD3.1 to ARS-UCD1.2 assembly.

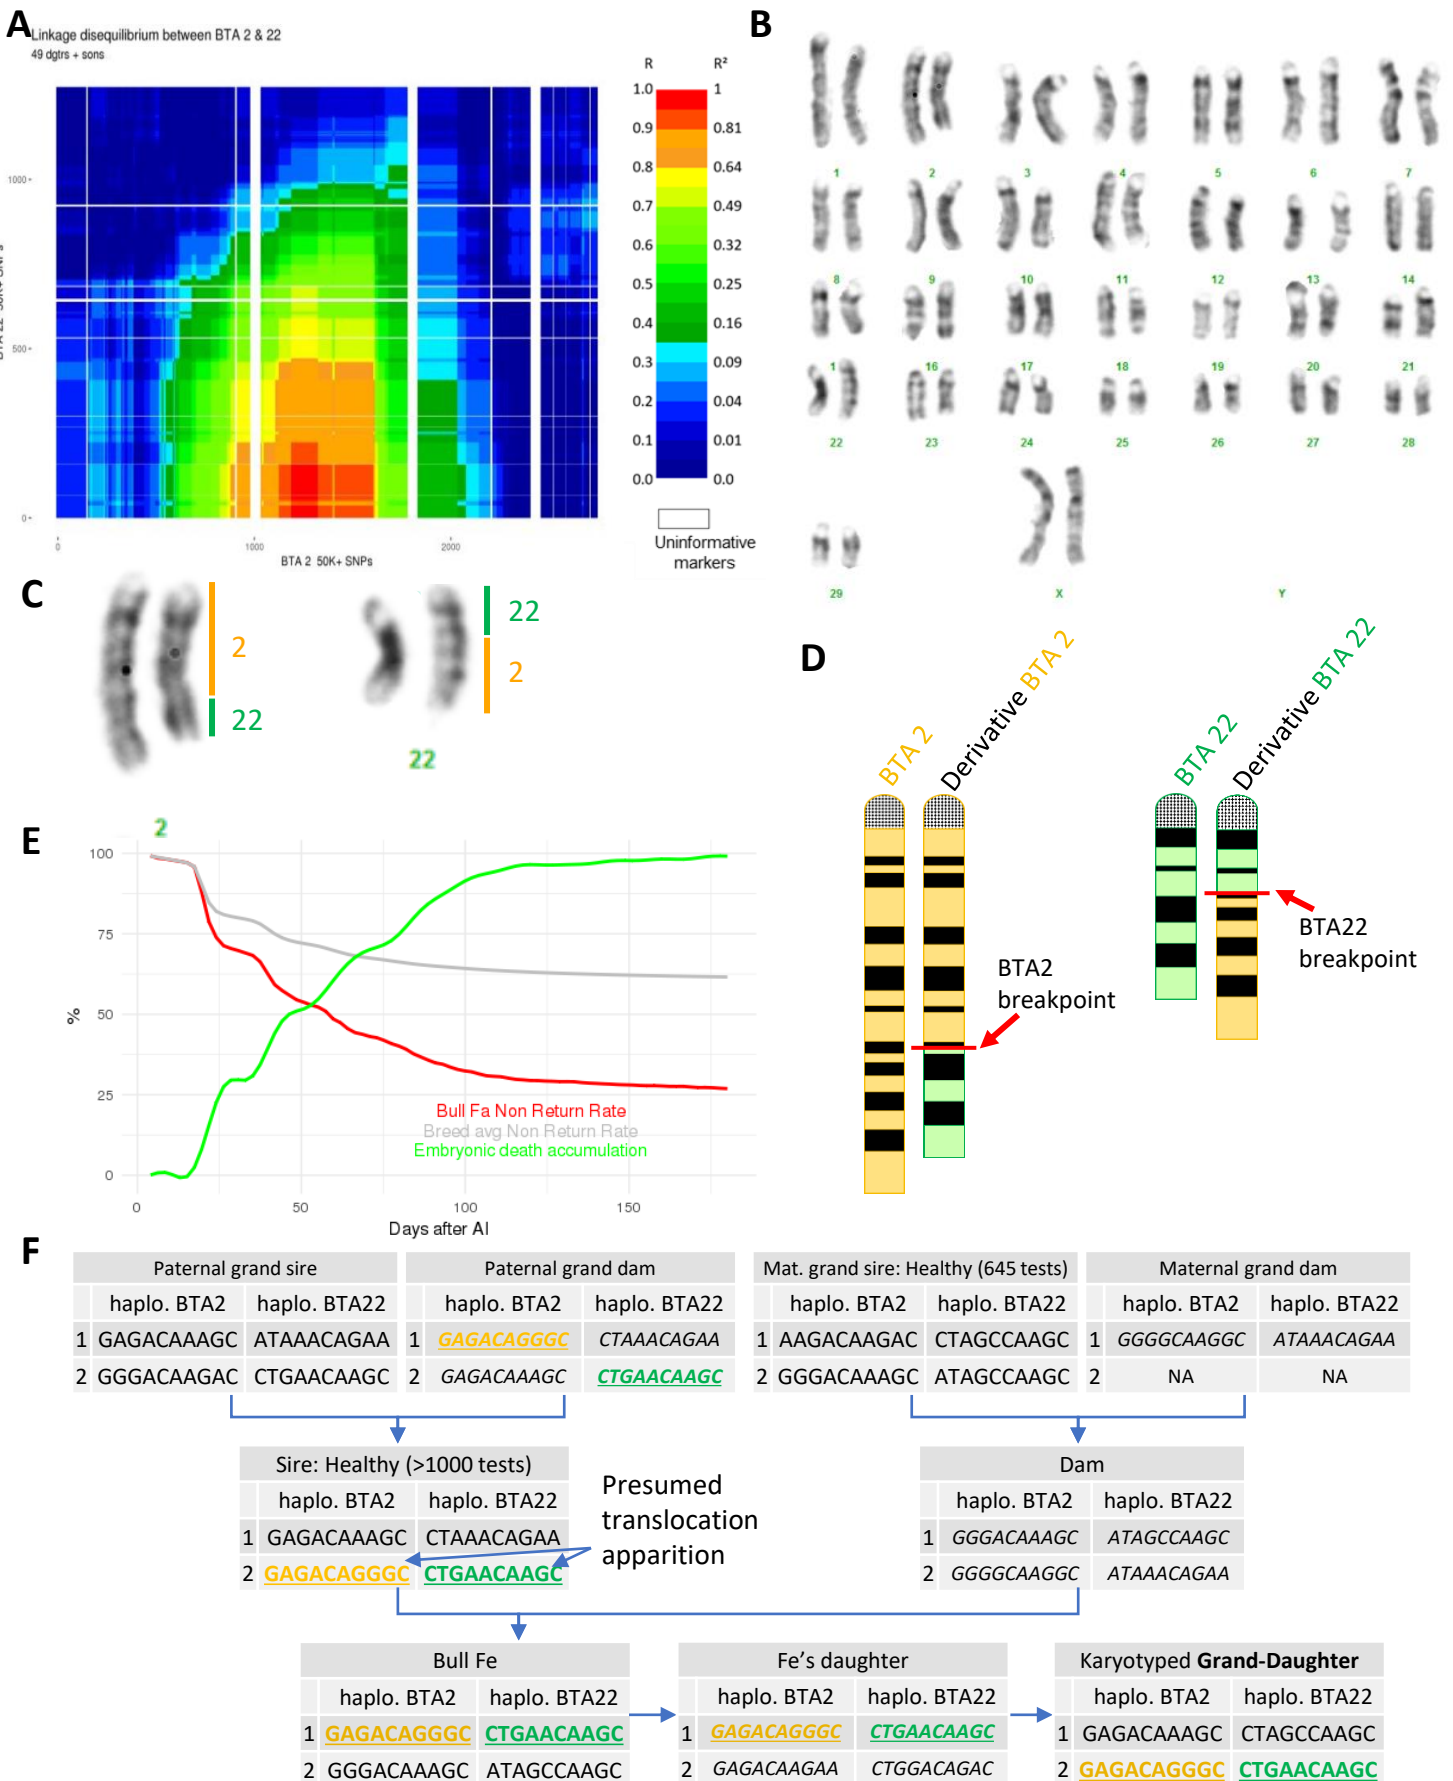

**Supplemental Figure S2. Information on t(2;22) and bull Fe.** (A) Linkage disequilibrium heat map. (B), (C) Complete GTG banding karyotype of an affected granddaughter of Fe and annotated close-up of the rearranged chromosomes. (D) Schematic representation of the rearranged chromosome combining information from cytogenetic analyses and long-read sequencing. (E) Daily non-return rate of inseminations performed with the semen of Fe semen compared to the average non-return rate of the breed. (F) Analysis of the transmission of the segments involved in IR in the pedigree of Fe based on haplotype information. 1) and 2) refer to the paternal and maternal phases, respectively. Haplotypes involved in the rearrangement are shown in bold and underlined. They are colored to match those of the original chromosomes. Italic haplotypes are inferred from the genotypes of relatives. Note that the karyotyped animal is a descendant of a daughter of Fe, which explains why it carries the IR on its maternal phases. Note that bull Fe inherited the two haplotypes in LD with the translocation from its sire, which showed normal LD pattern in our initial screen. We concluded that the bull Fe was the first mutant and that the rearrangement was the result of an abnormal male meiosis.

## Putative breakpoint BTA2:60,476,739 bp

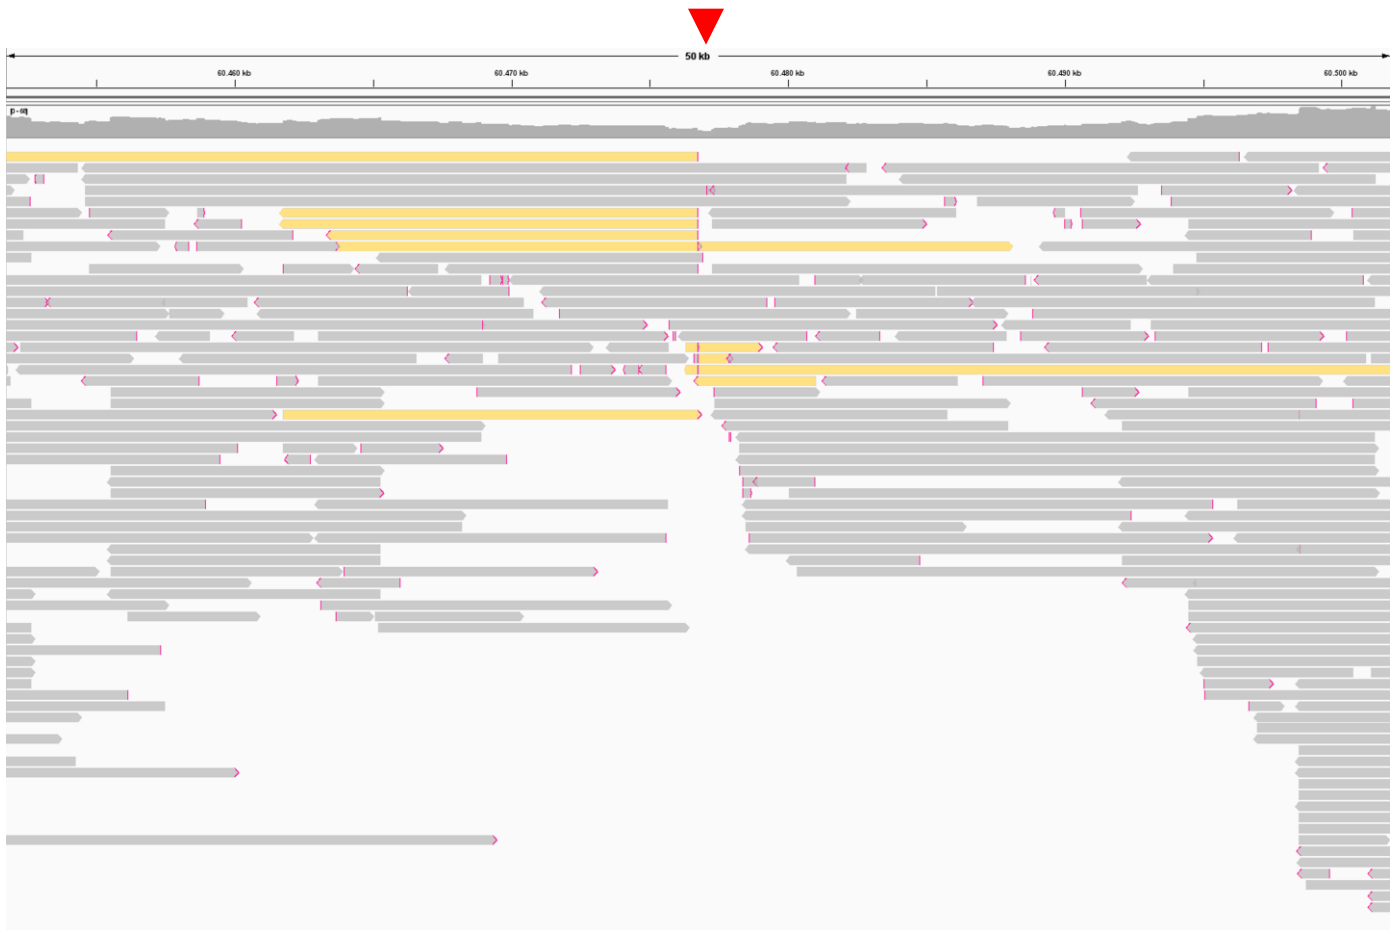

**Supplemental Figure S2 (continued).** (G) IGV screenshot of long read sequence alignments around the breakpoint +/- 50kb on BTA2. Reads with partial alignment on BTSAT2 material are highlighted in yellow and green.

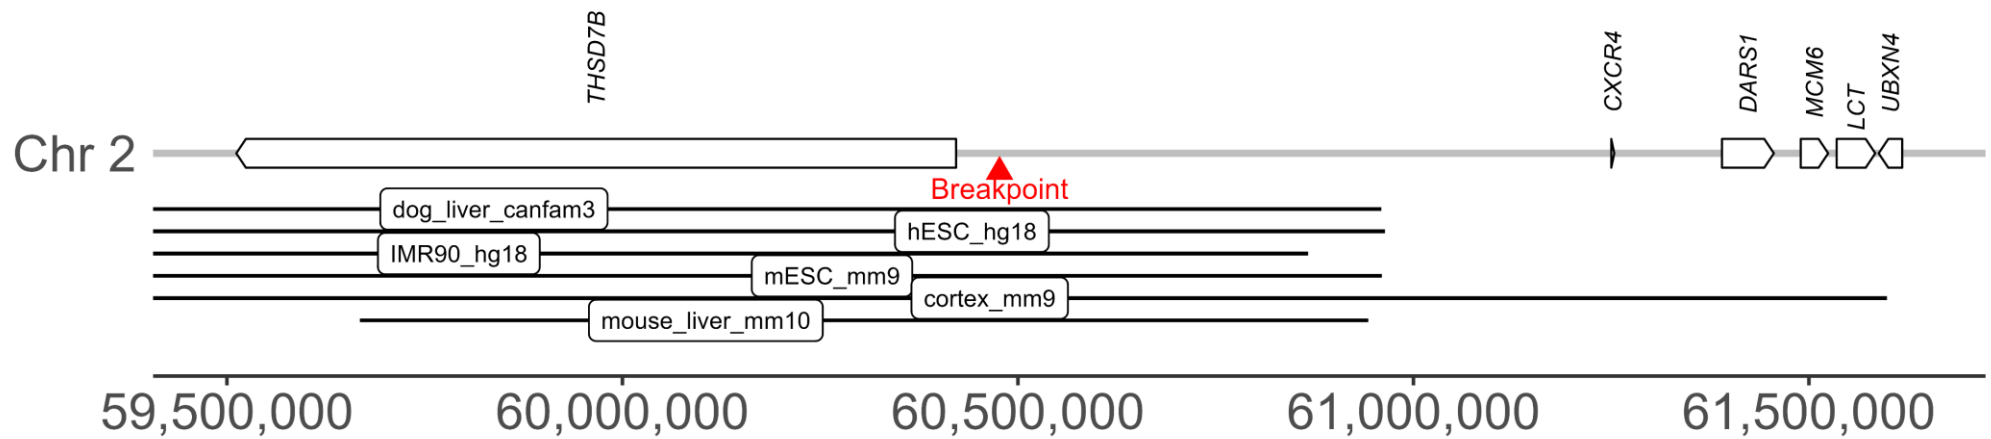

**Supplemental Figure 2 (continued).** (H) Annotated map of the chromosomal regions flanking the breakpoints for t(2;22) in bull Fe. Gene annotation has been obtained using Ensembl Biomart Tool. Information on TAD locations has been determined by orthology comparison with human, mouse and dogs (Wang et al.,2018). The tool liftOver was used to convert the positions of bovine UMD3.1 to ARS-UCD1.2 assembly.

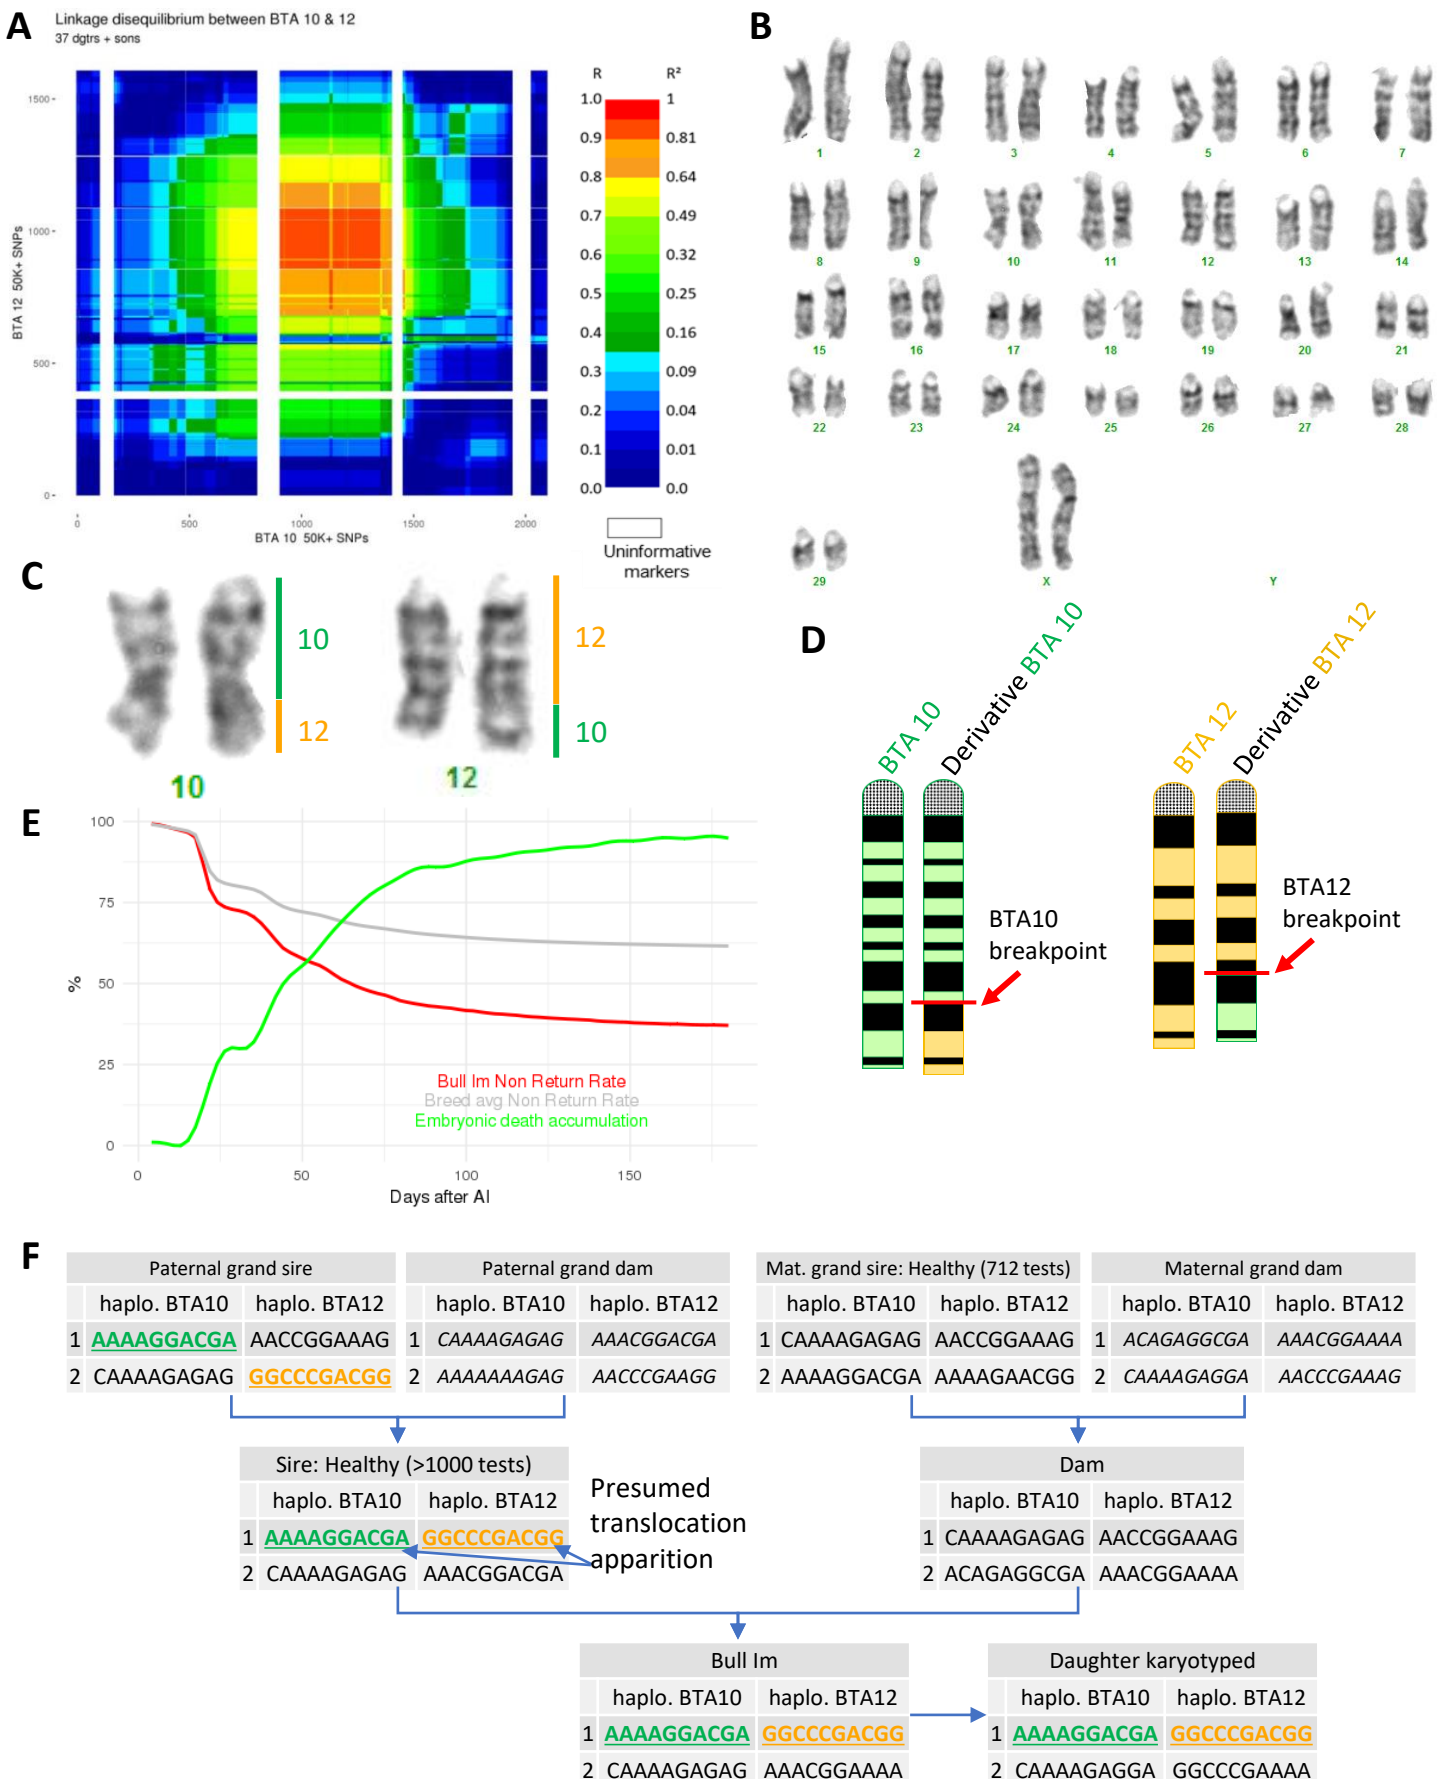

**Supplemental Figure S3. Information on t(10;12) and bull Im.** (A) Linkage disequilibrium heat map. (B), (C) Complete GTG banding karyotype of an affected daughter of Im and annotated close-up of the rearranged chromosomes. (D) Schematic representation of the rearranged chromosome using information from cytogenetic analyses. (E) Daily non-return rate of inseminations performed with the semen of Im semen compared to the average non-return rate of the breed. (F) Analysis of the transmission of the segments involved in IR in the pedigree of Im based on haplotype information. 1) and 2) refer to the paternal and maternal phases, respectively. Haplotypes involved in the rearrangement are shown in bold and underlined. They are colored to match those of the original chromosomes. Italic haplotypes are inferred from the genotypes of relatives.

Note that bull Im inherited the two haplotypes in LD with the translocation from its sire, which showed normal LD pattern in our initial screen. We concluded that the bull Im was the first mutant and that the rearrangement was the result of an abnormal male meiosis.



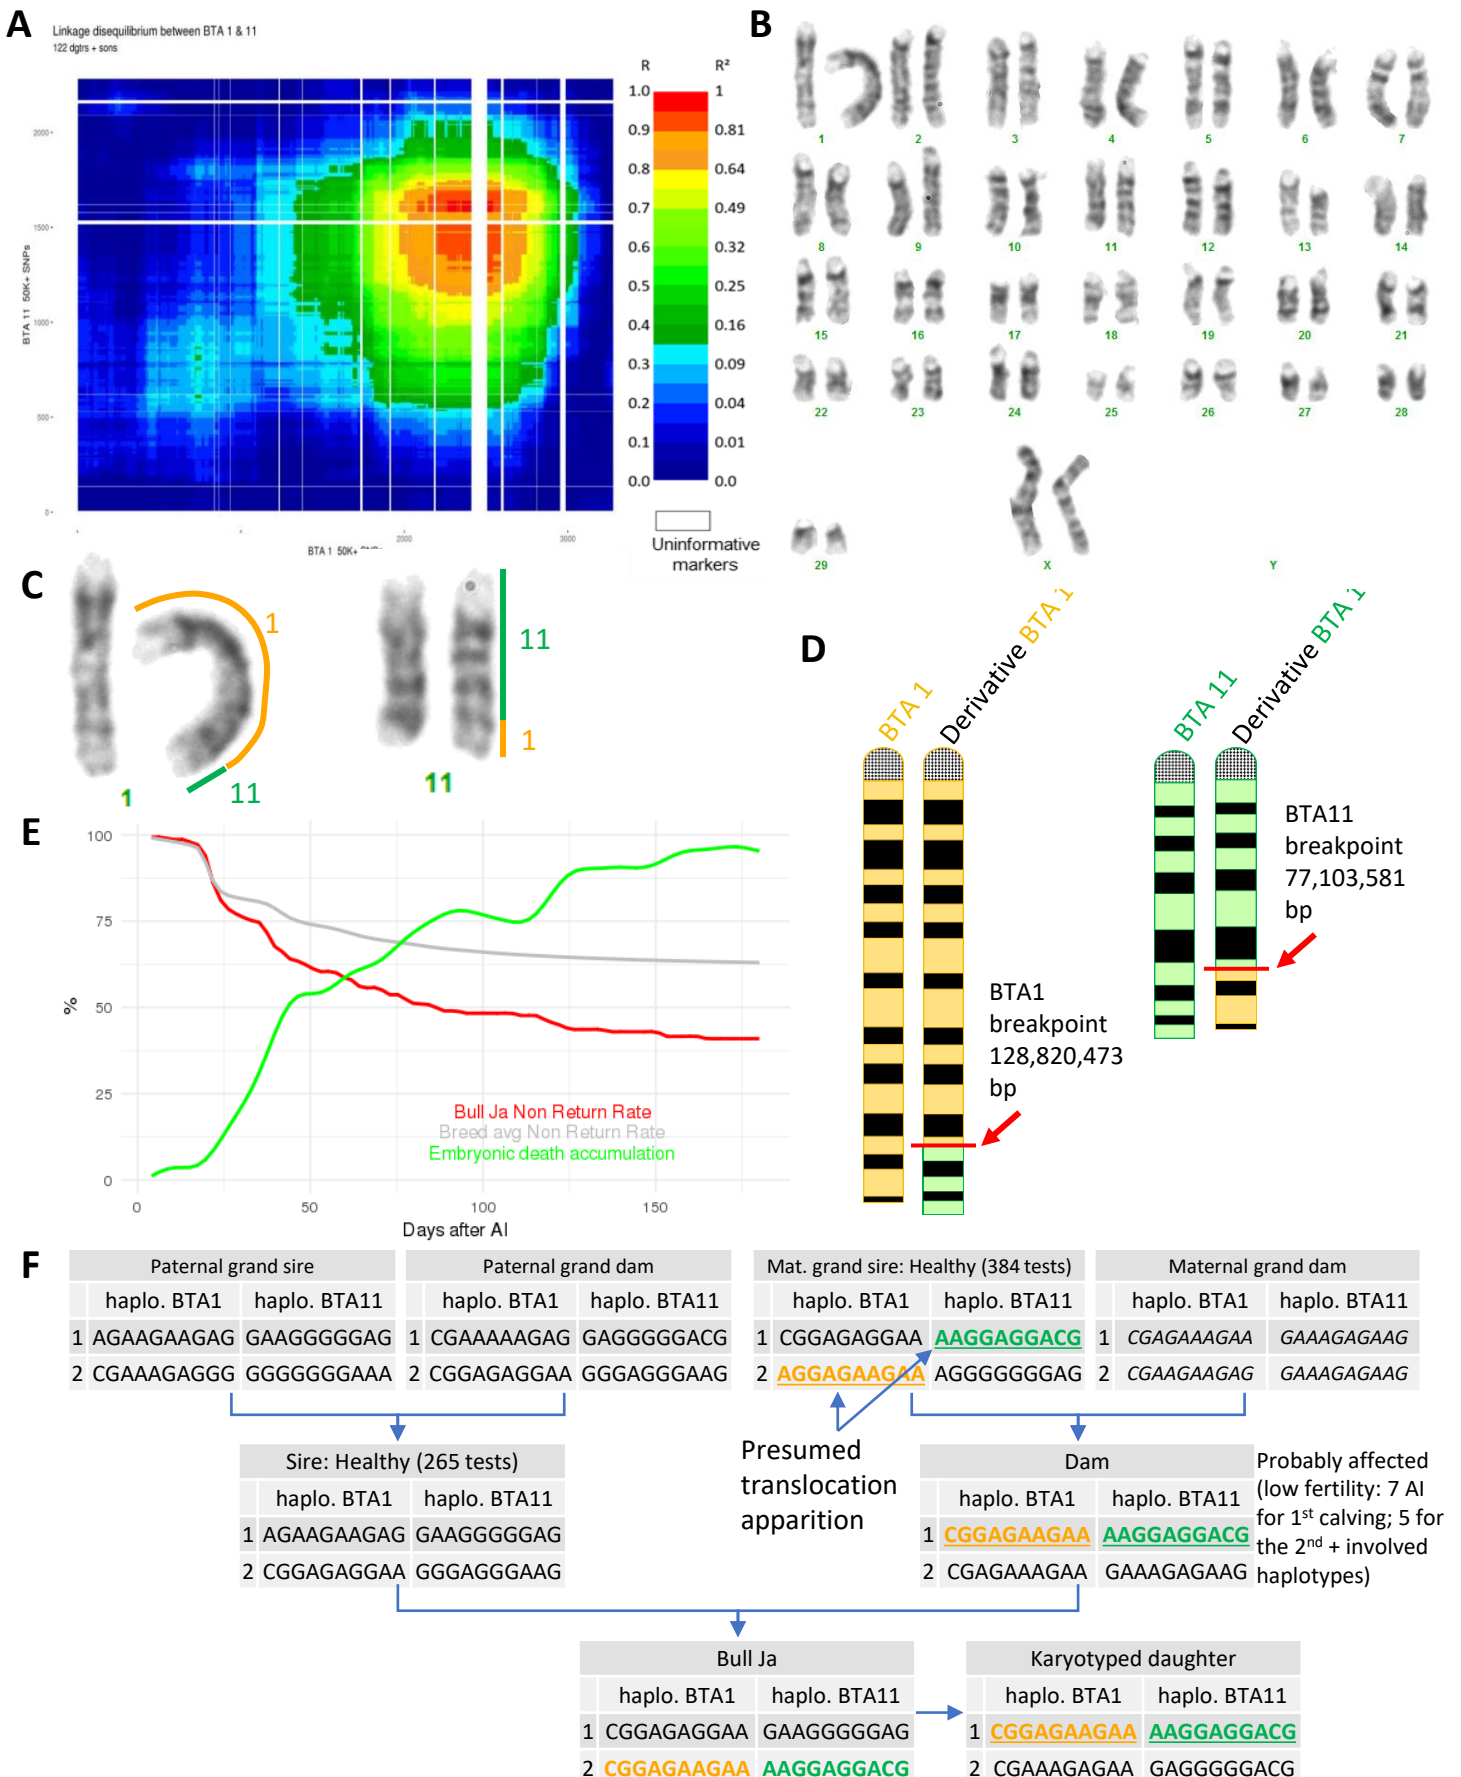

**Supplemental Figure S4. Information on t(1;11) and bull Ja.** (A) Linkage disequilibrium heat map. (B), (C) Complete GTG banding karyotype of an affected daughter of Ja and annotated close-up of the rearranged chromosomes. (D) Schematic representation of the rearranged chromosome combining information from cytogenetic analyses and long-read sequencing. (E) Daily non-return rate of inseminations performed with the semen of Ja semen compared to the average non-return rate of the breed. (F) Analysis of the transmission of the segments involved in IR in the pedigree of Ja based on haplotype information. 1) and 2) refer to the paternal and maternal phases, respectively. Haplotypes involved in the rearrangement are shown in bold and underlined. They are colored to match those of the original chromosomes. Italic haplotypes are inferred from the genotypes of relatives.

Note that bull Ja inherited the two haplotypes in LD with the translocation from its maternal grand sire, which showed normal LD pattern in our initial screen. The dam of Ja, which was genotyped, also had these haplotypes and was extremely subfertile with 7 AI to conceive its first calf and 5 for its second, supporting the evidence that it carried the IR. We concluded that the dam of Ja was the first mutant and that the rearrangement was the result of an abnormal male meiosis.



Breakpoint BTA1:128,820,473 bp

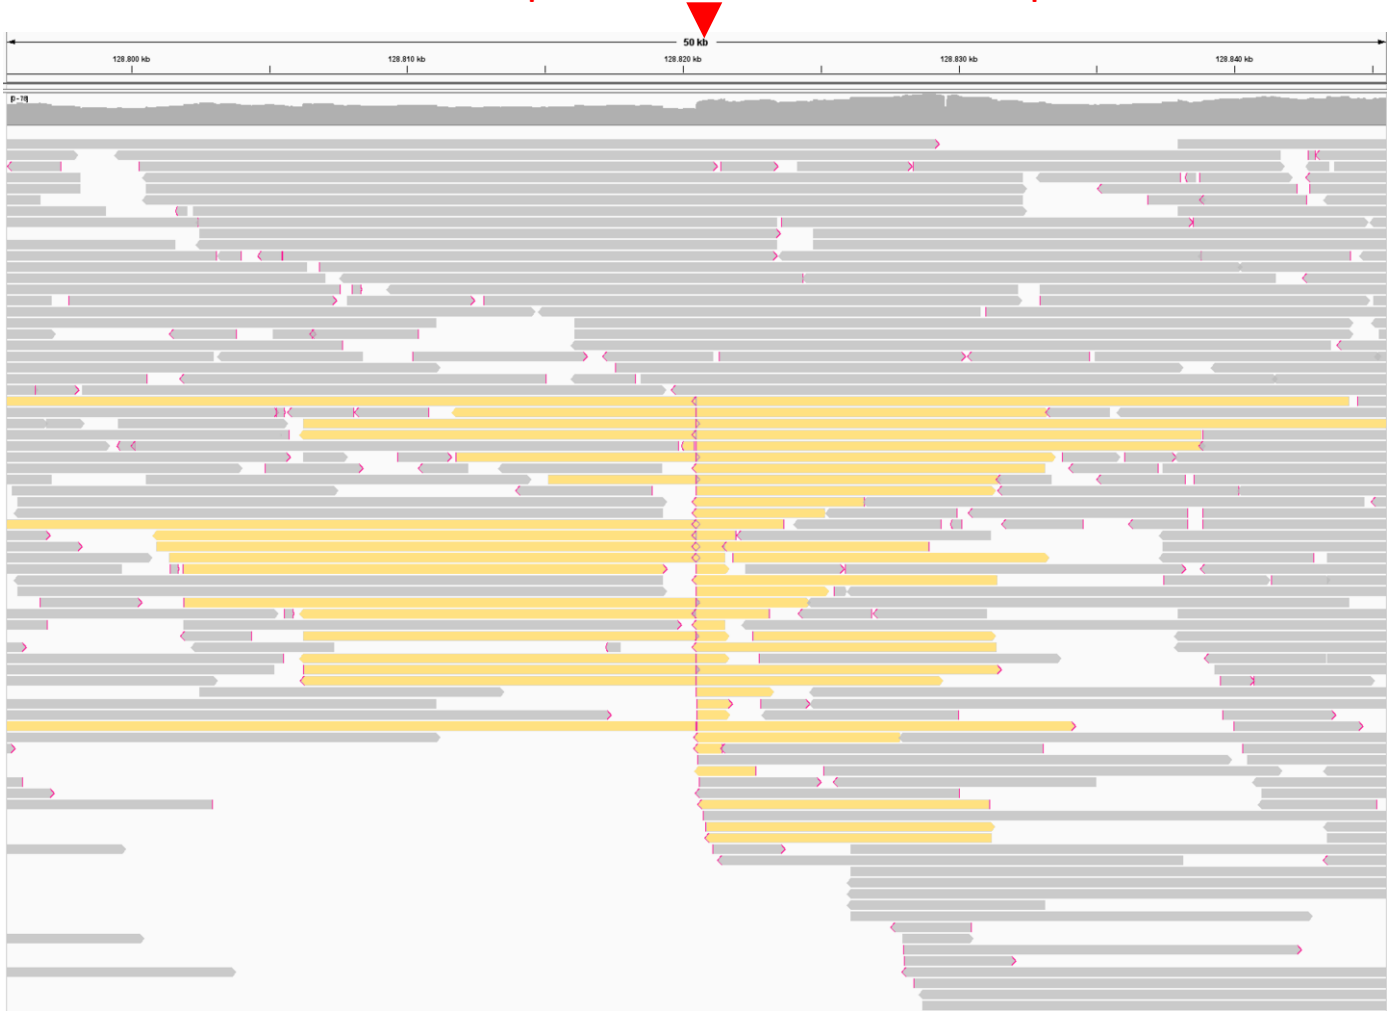

Breakpoint BTA11:77,103,581 bp

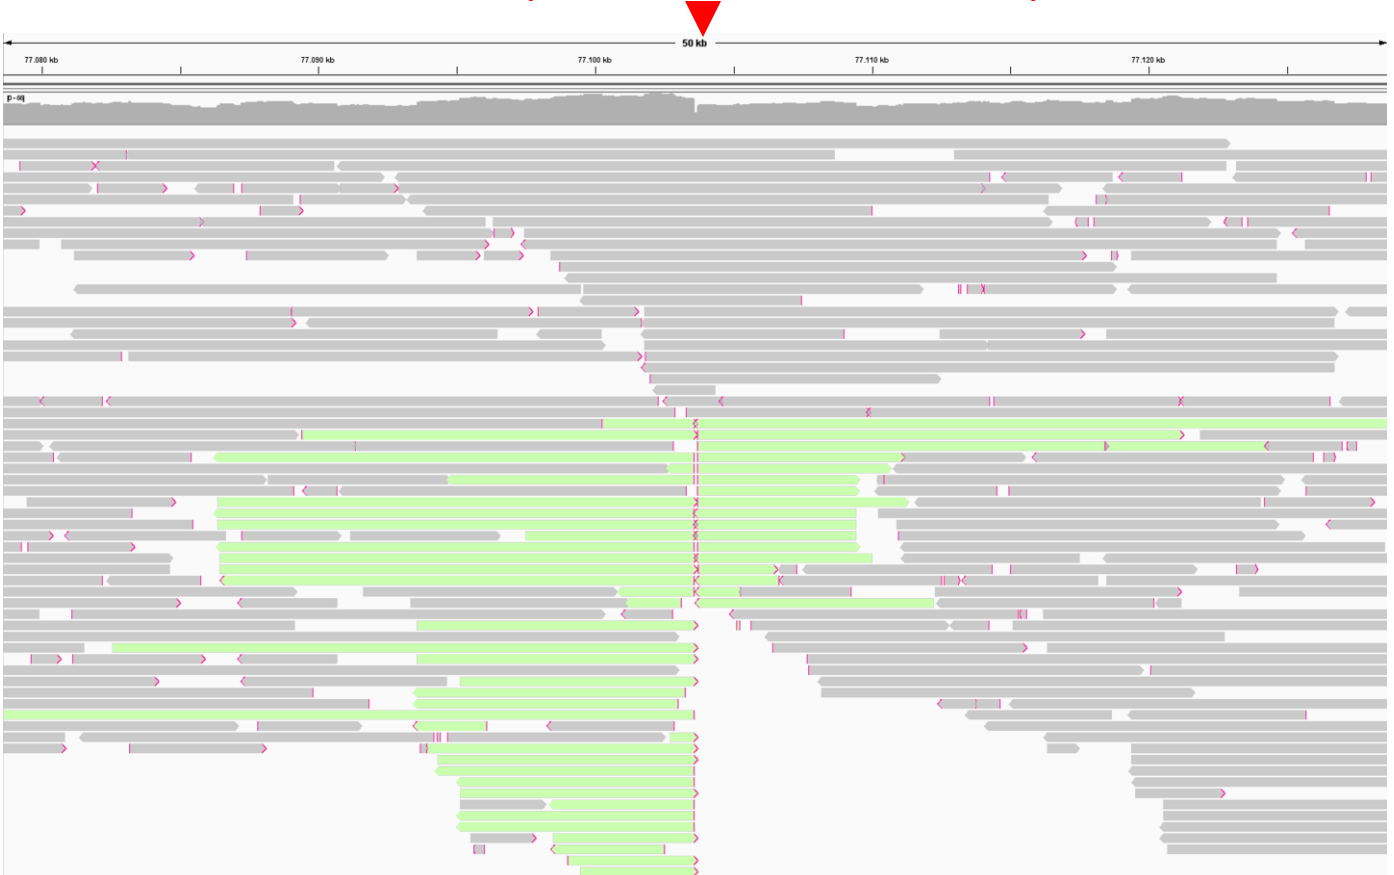

**Supplemental Figure S4 (continued).** (G) IGV screenshot of long read sequence alignments around the breakpoints +/-50kb on BTA1 and BTA11. Reads with partial alignment on the reciprocally translocated chromosome are highlighted in yellow and green.

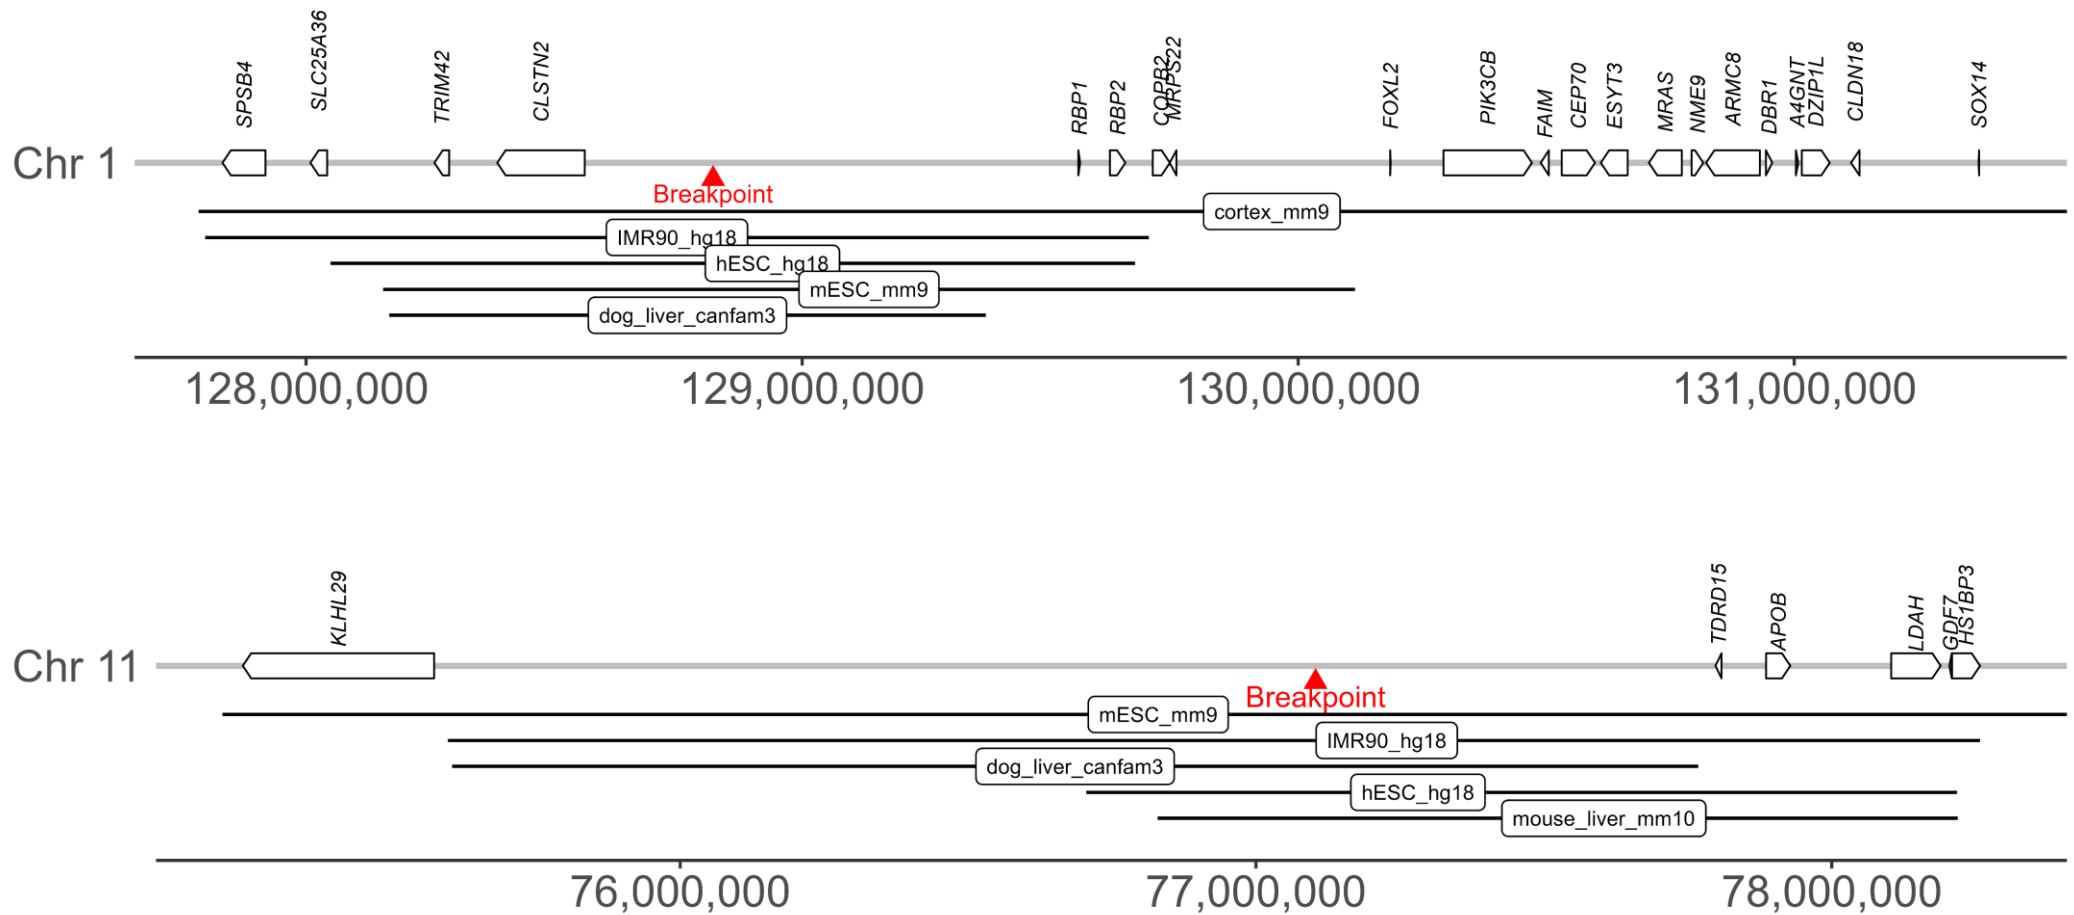

**Supplemental Figure 4 (continued).** (H) Annotated map of the chromosomal regions flanking the breakpoints for t(1;11) in bull Ja. Gene annotation has been obtained using Ensembl Biomart Tool. Information on TAD locations has been determined by orthology comparison with human, mouse and dogs (Wang et al.,2018). The tool liftOver was used to convert the positions of bovine UMD3.1 to ARS-UCD1.2 assembly.

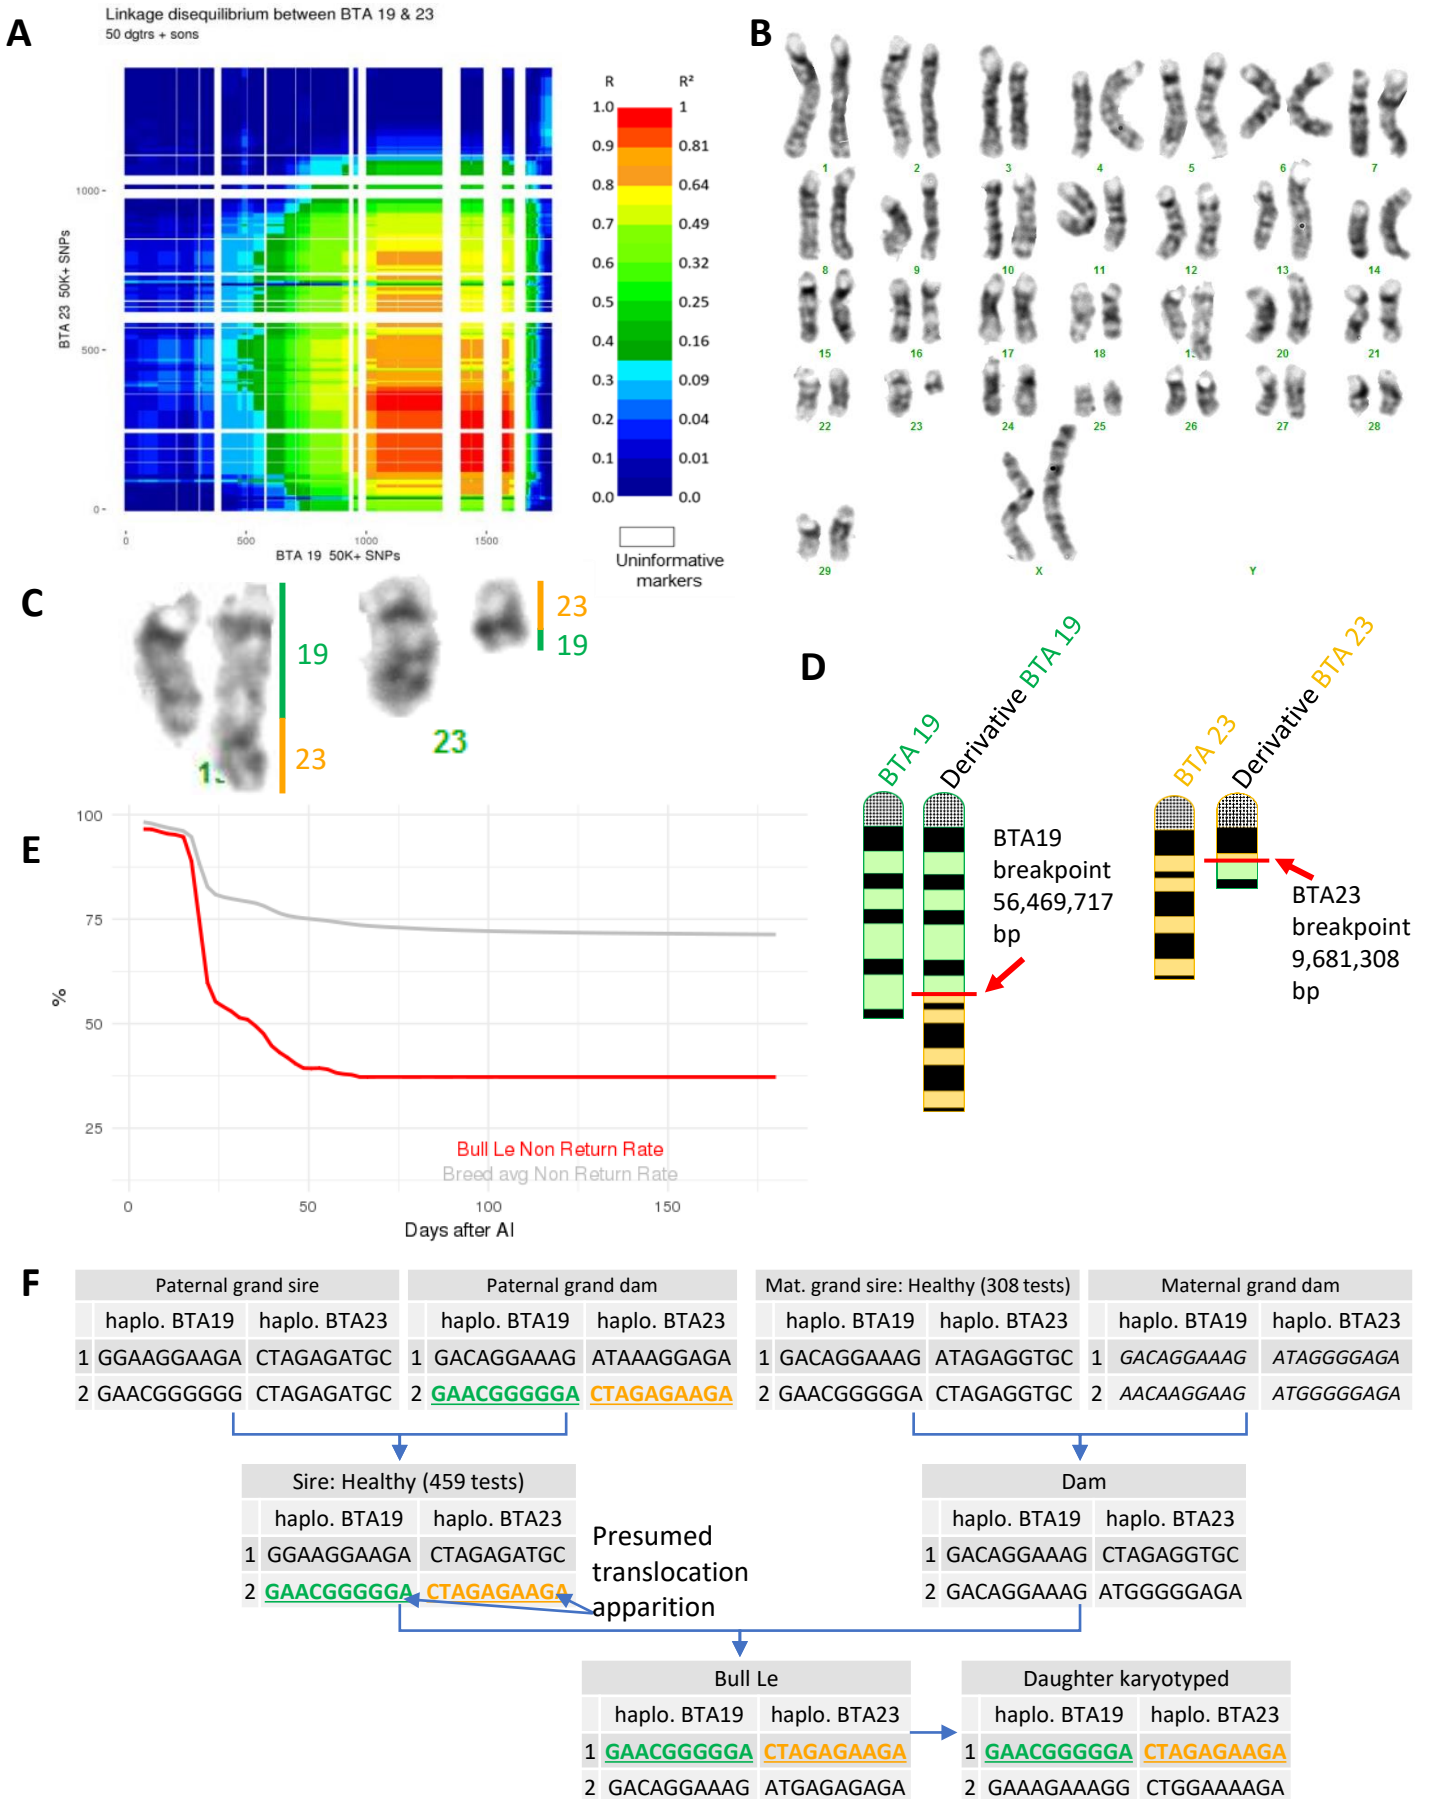

**Supplemental Figure S5. Information on t(19;23) and bull Le.** (A) Linkage disequilibrium heat map. (B), (C) Complete GTG banding karyotype of an affected daughter of Le and annotated close-up of the rearranged chromosomes. (D) Schematic representation of the rearranged chromosome combining information from cytogenetic analyses and long-read sequencing. (E) Daily non-return rate of inseminations performed with the semen of Le semen compared to the average non-return rate of the breed. (F) Analysis of the transmission of the segments involved in IR in the pedigree of Le based on haplotype information. 1) and 2) refer to the paternal and maternal phases, respectively. Haplotypes involved in the rearrangement are shown in bold and underlined. They are colored to match those of the original chromosomes. Italic haplotypes are inferred from the genotypes of relatives.

Note that bull Le inherited the two haplotypes in LD with the translocation from its sire, which showed normal LD pattern in our initial screen. We concluded that the bull Le was the first mutant and that the rearrangement was the result of an abnormal male meiosis.

Breakpoint BTA19:56,469,717 bp

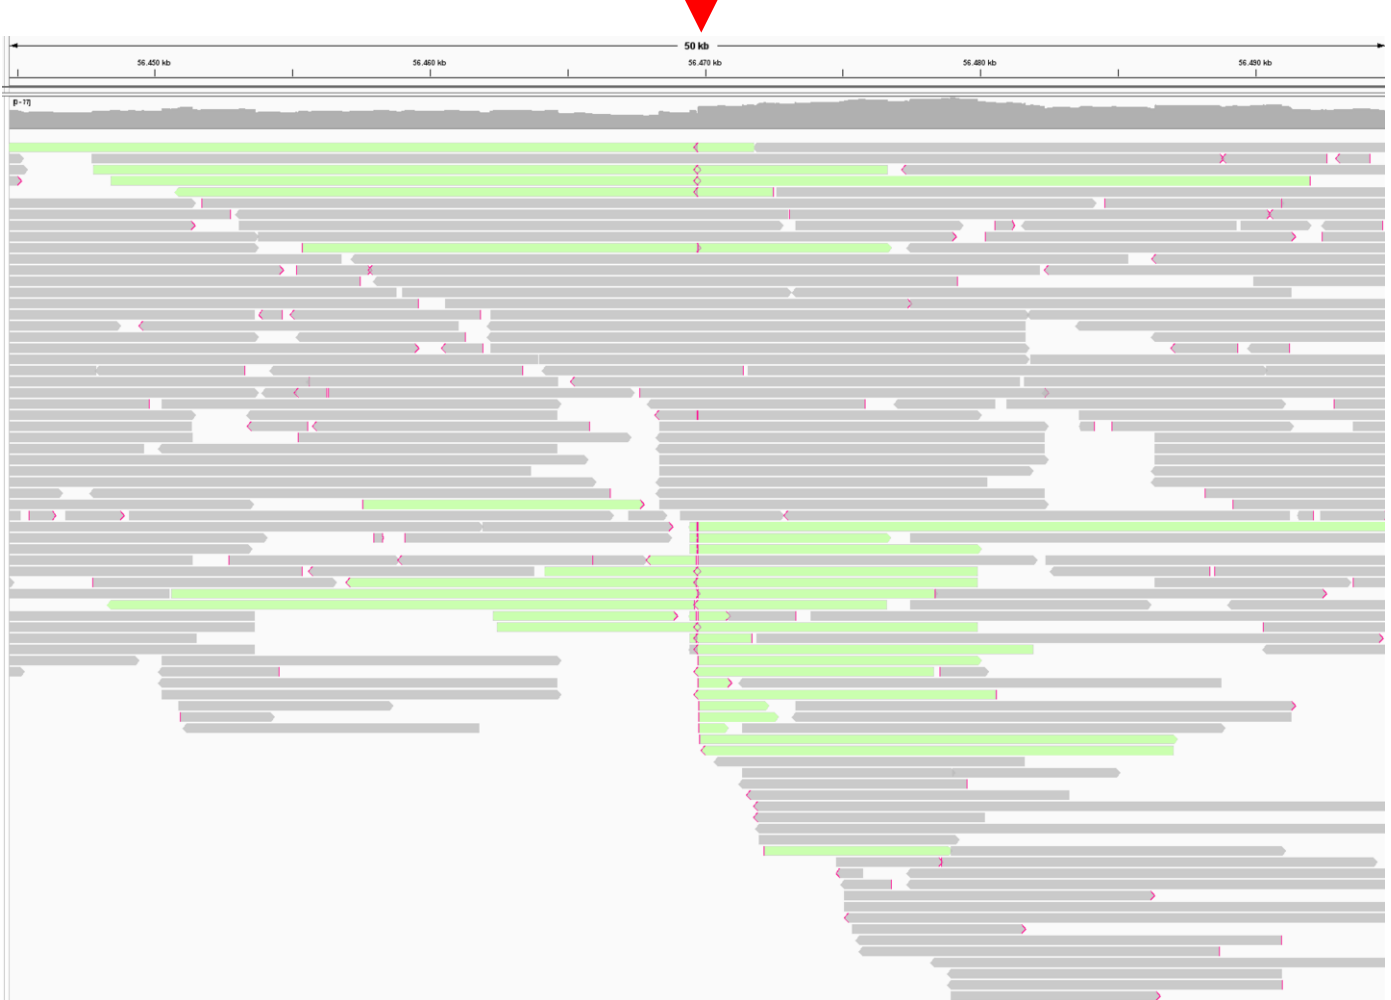

Breakpoint BTA23:9,681,296 bp

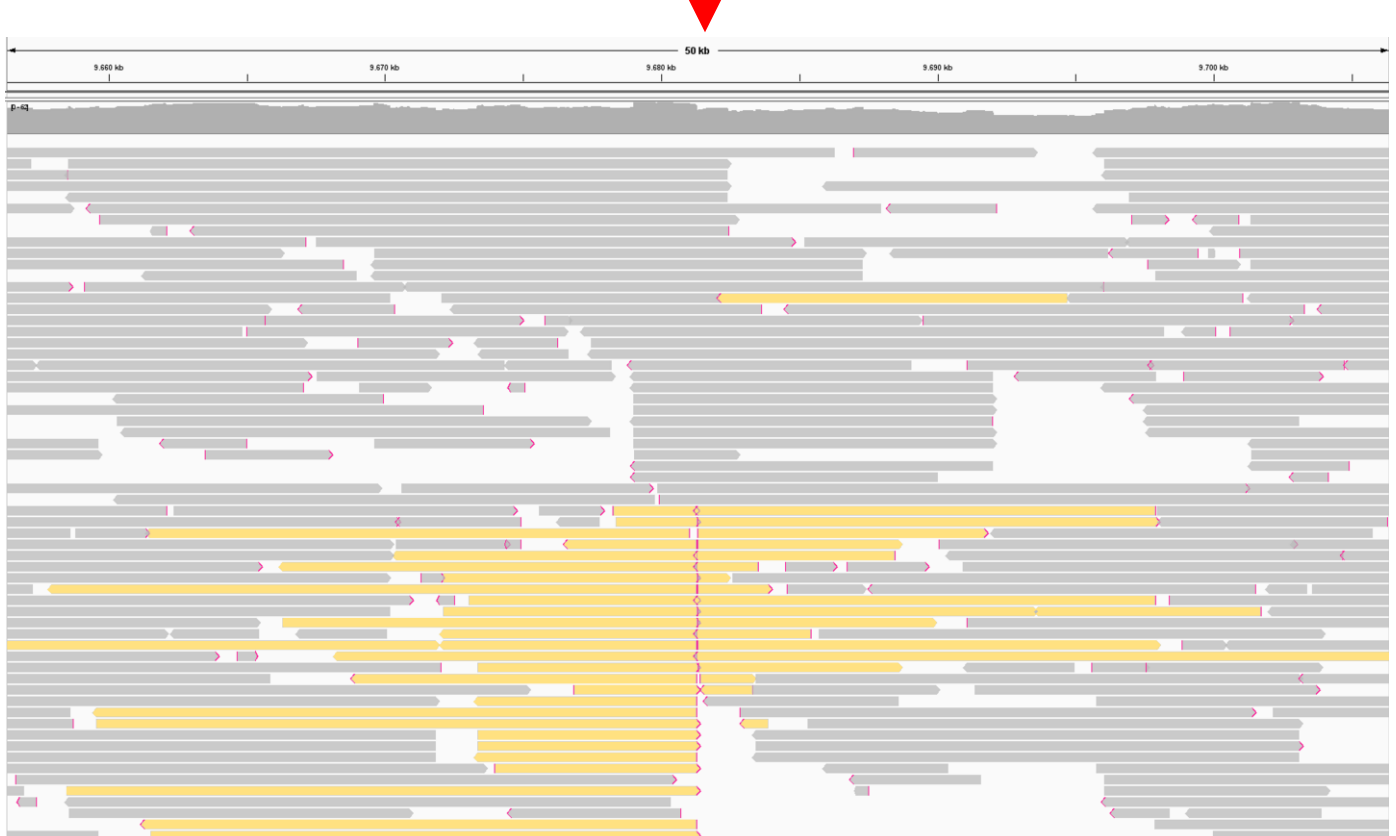

**Supplemental Figure S5 (continued).** (G) IGV screenshot of long read sequence alignments around the breakpoints +/-50kb on BTA19 and BTA23. Reads with partial alignment on the reciprocally translocated chromosome are highlighted in yellow and green.



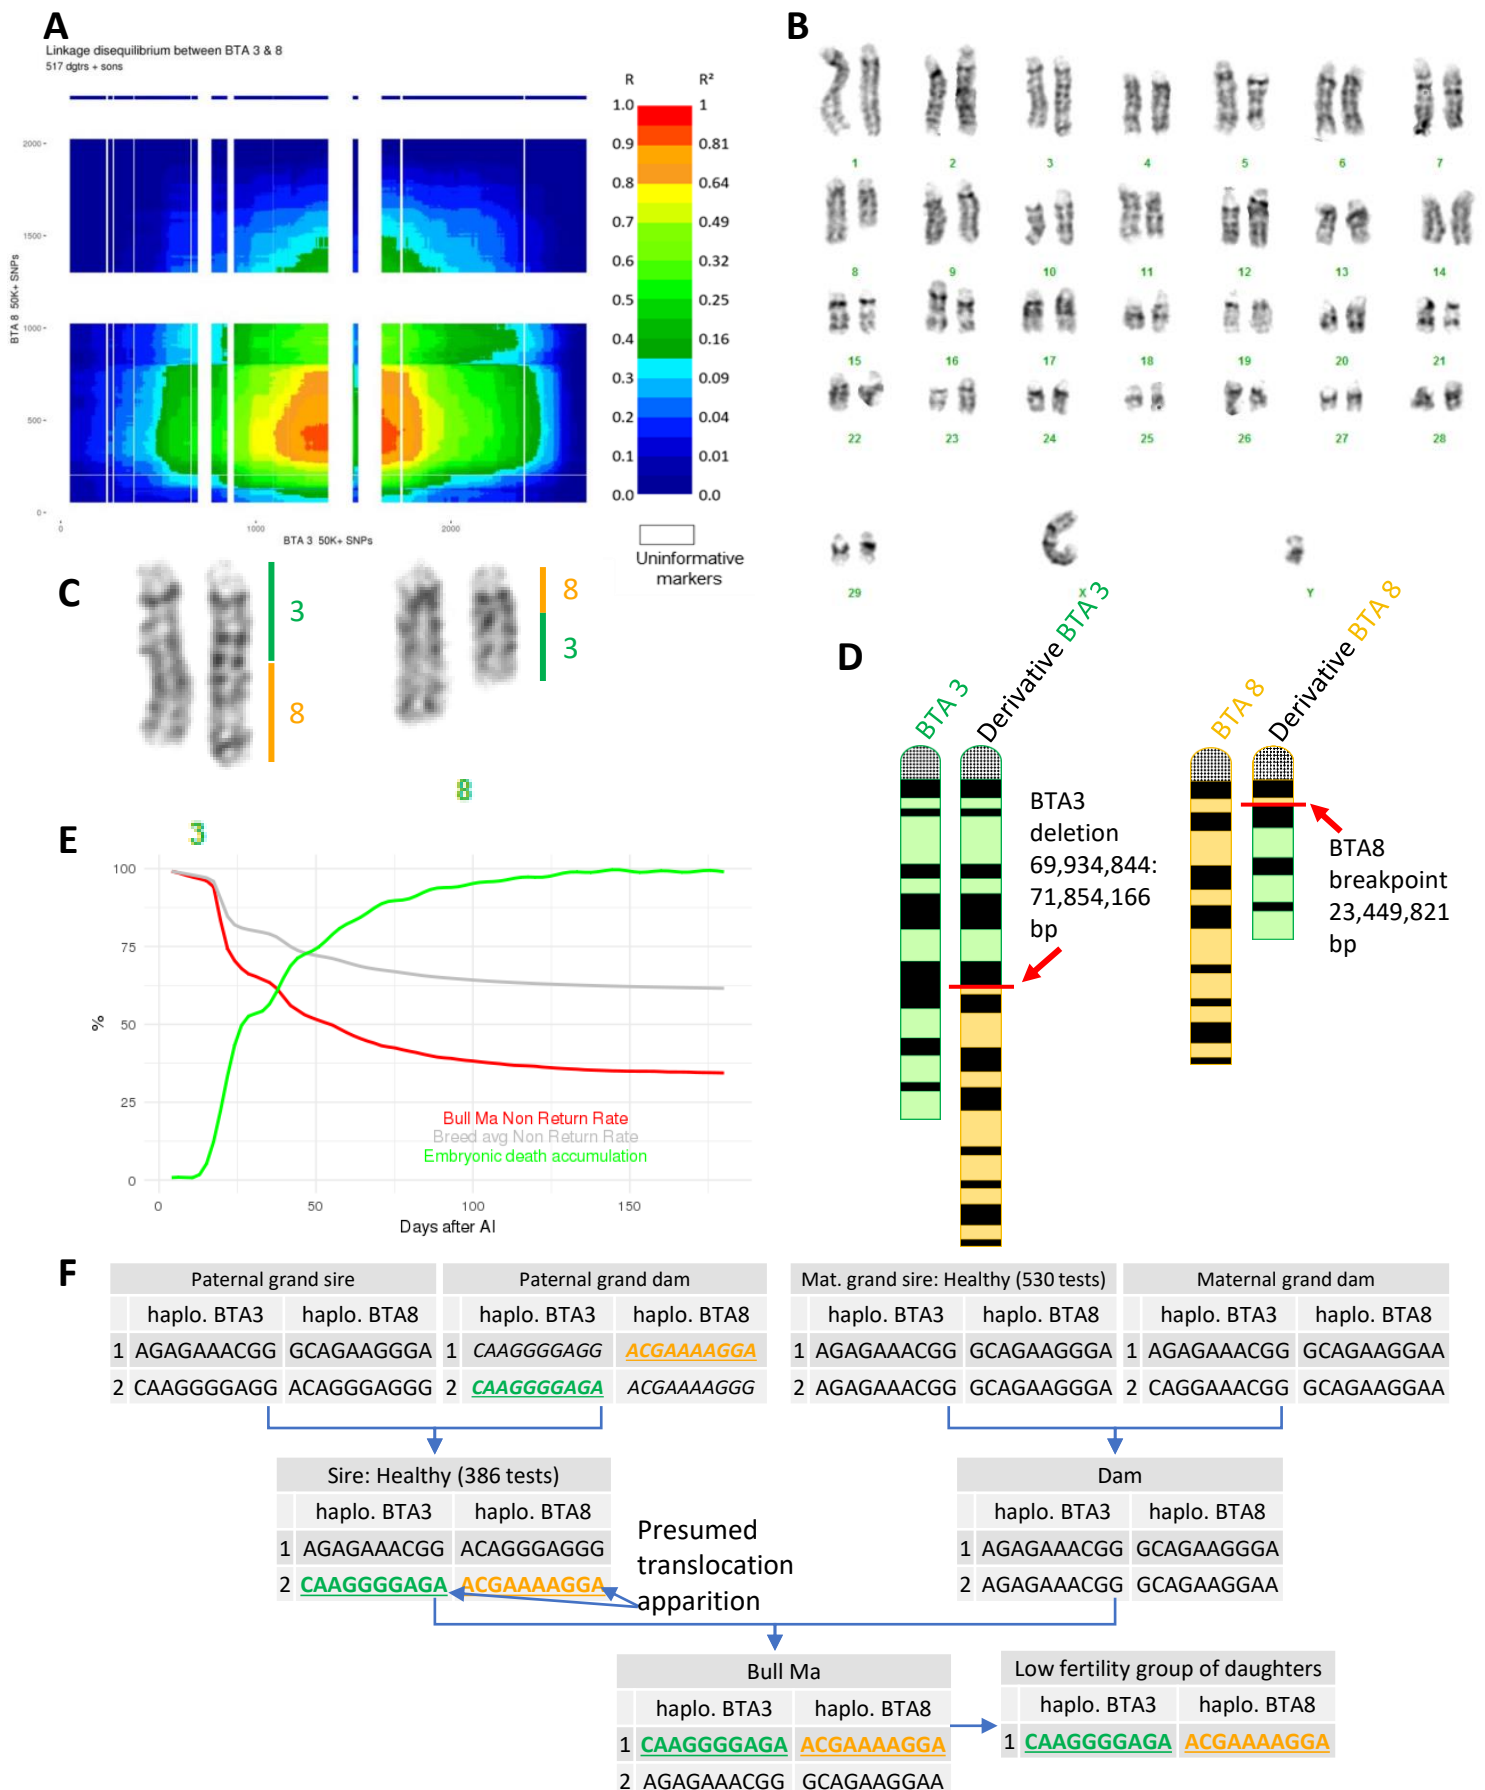

**Supplemental Figure S6. Information on t(3;8) and bull Ma.** (A) Linkage disequilibrium heat map. (B), (C) Complete GTG banding karyotype of Ma and annotated close-up of the rearranged chromosomes. (D) Schematic representation of the rearranged chromosome combining information from cytogenetic analyses and long-read sequencing. (E) Daily non-return rate of inseminations performed with the semen of Ma semen compared to the average non-return rate of the breed. (F) Analysis of the transmission of the segments involved in IR in the pedigree of Ma based on haplotype information. 1) and 2) refer to the paternal and maternal phases, respectively. Haplotypes involved in the rearrangement are shown in bold and underlined. They are colored to match those of the original chromosomes. Italic haplotypes are inferred from the genotypes of relatives. Note that the karyotyped animal is a Ma itself.

Note that bull Ma inherited the two haplotypes in LD with the translocation from its sire, which showed normal LD pattern in our initial screen. We concluded that the bull Ma was the first mutant and that the rearrangement was the result of an abnormal male meiosis.

Breakpoint BTA3:69,934,844 bp

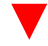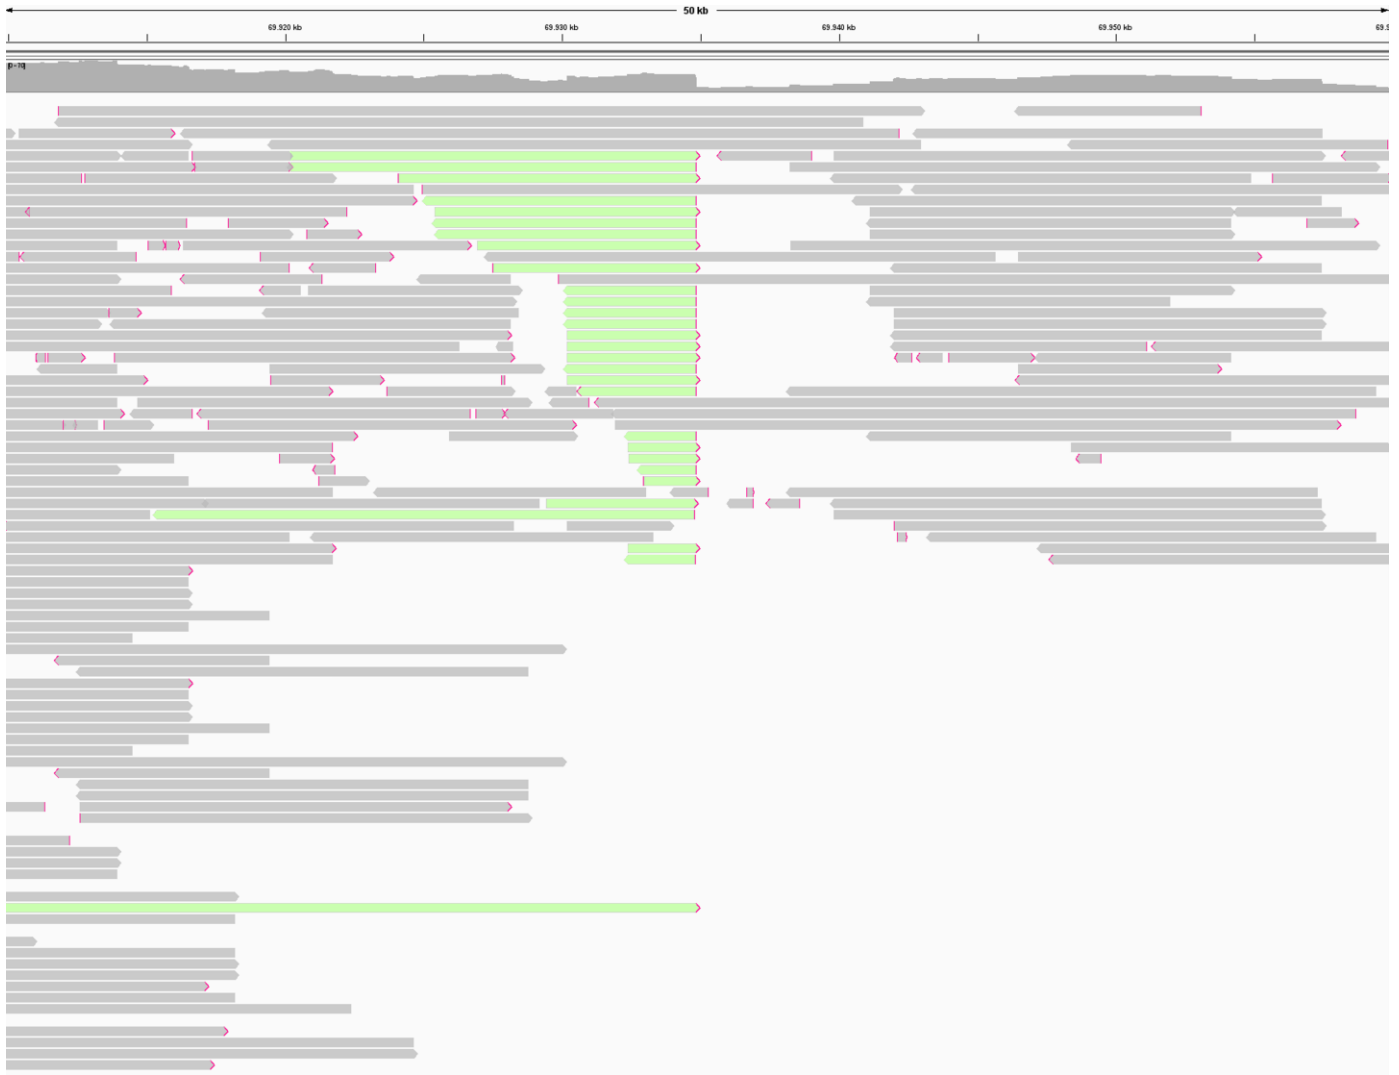

Breakpoint BTA3:71,854,166 bp

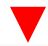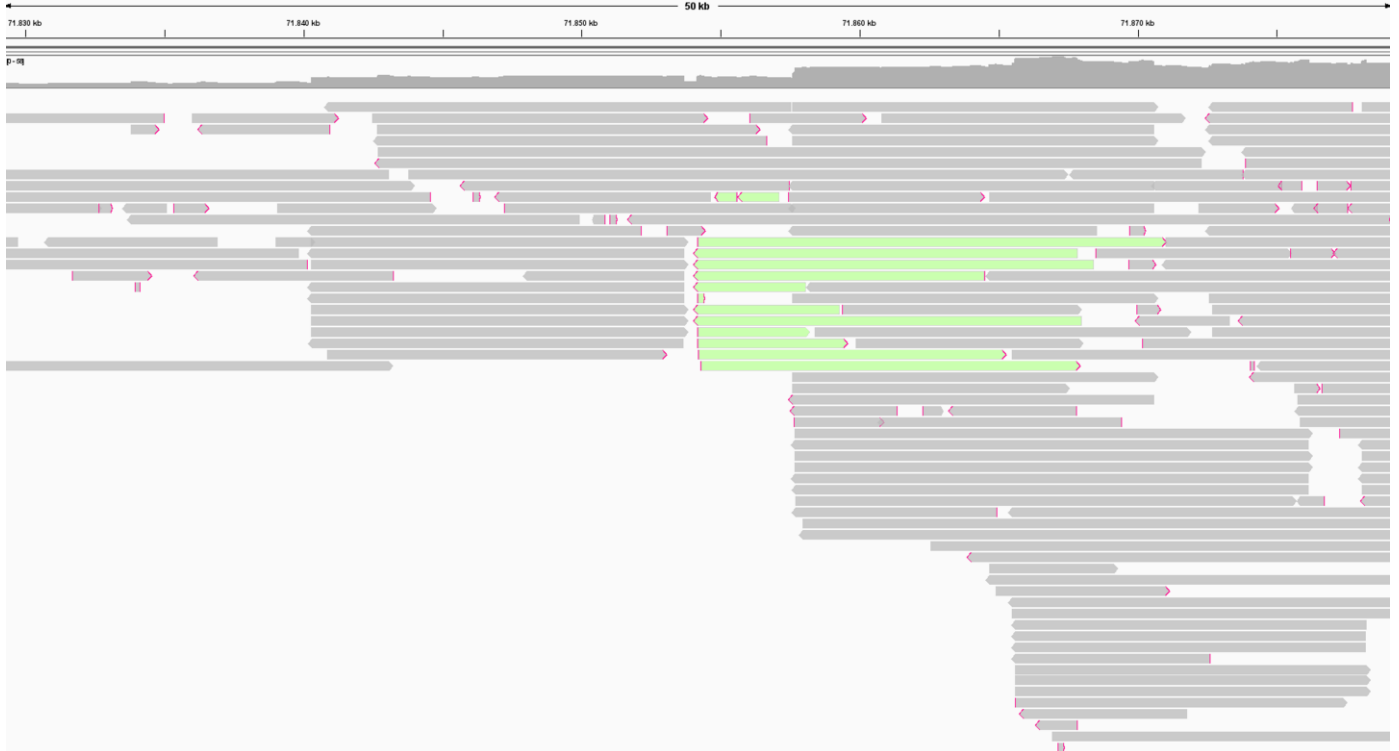

**Supplemental Figure S6 (continued).** (G) IGV screenshot of long read sequence alignments around the breakpoints +/-50kb on BTA3 and BTA8. Reads with partial alignment on the reciprocally translocated chromosome are highlighted in yellow and green.



Breakpoint BTA8:23,449,822 bp

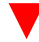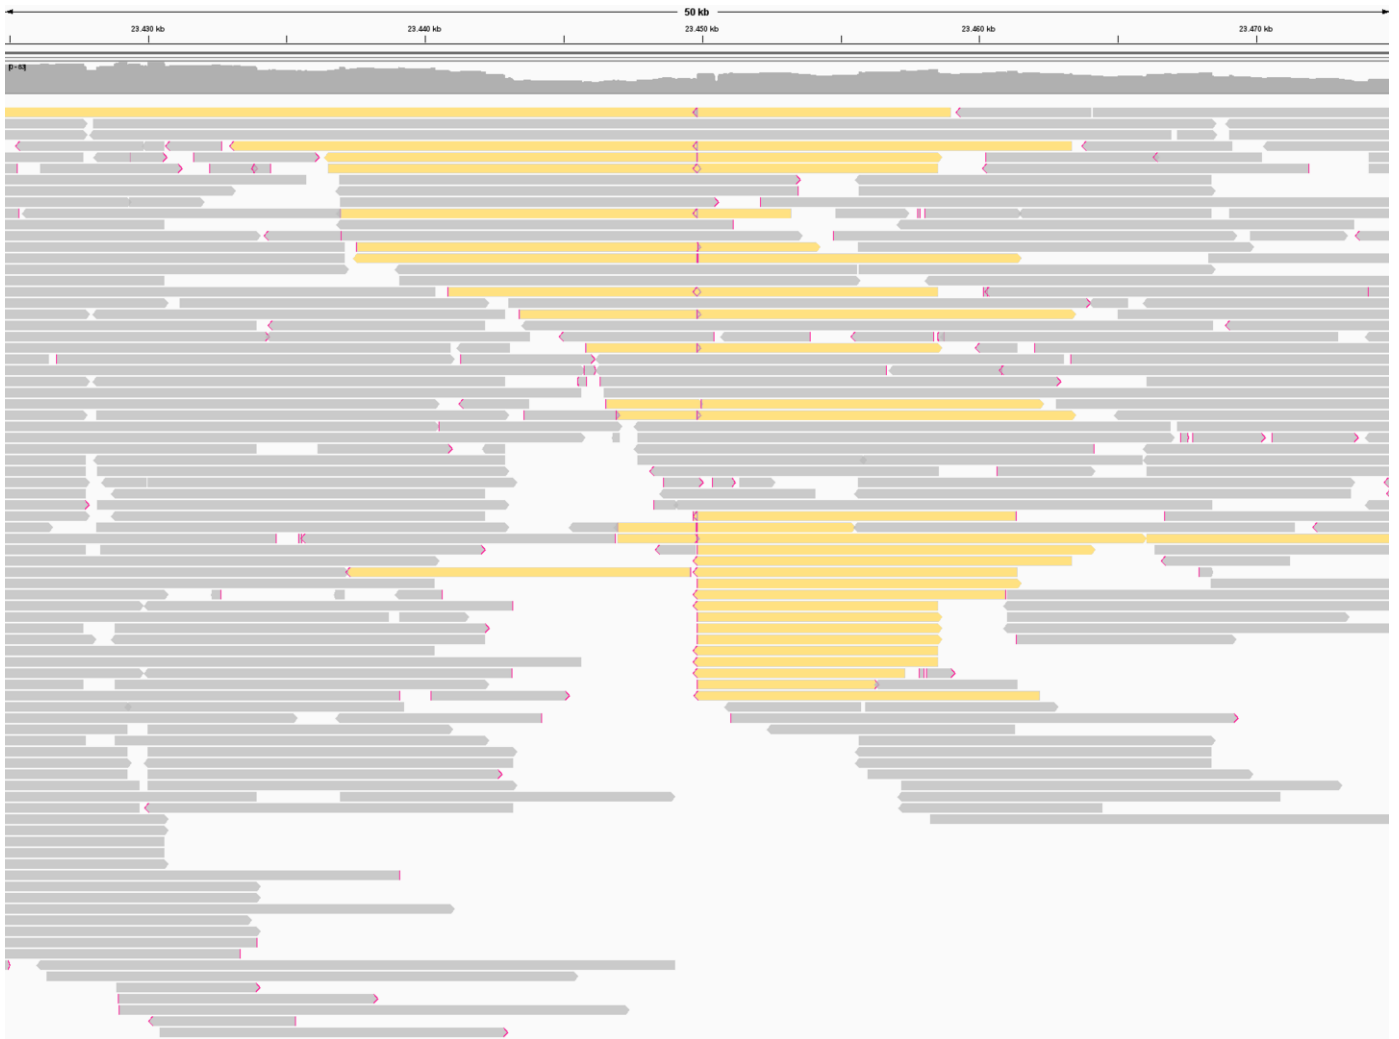

**Supplemental Figure S6 (continued).** (G) IGV screenshot of long read sequence alignments around the breakpoints +/-50kb on BTA3 and BTA8. Reads with partial alignment on the reciprocally translocated chromosome are highlighted in yellow and green.

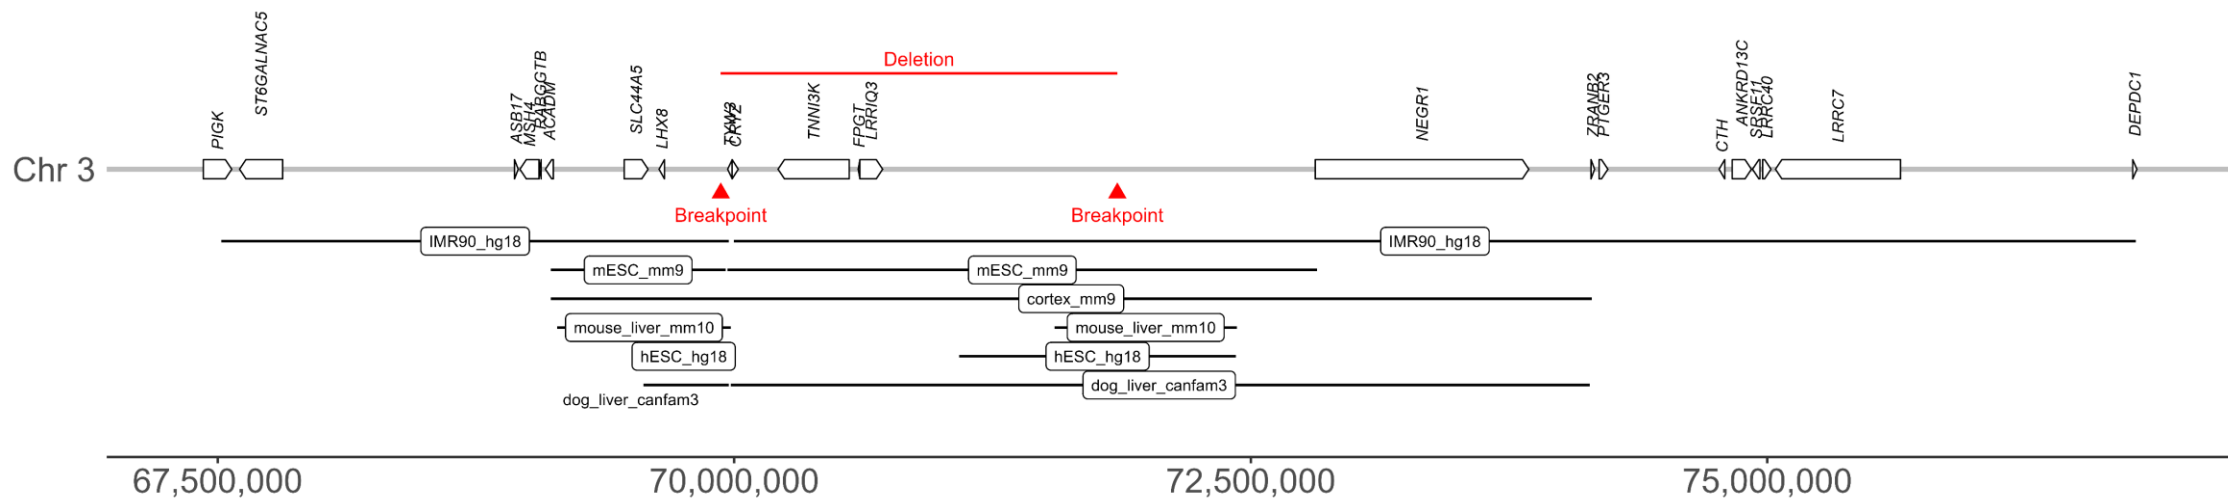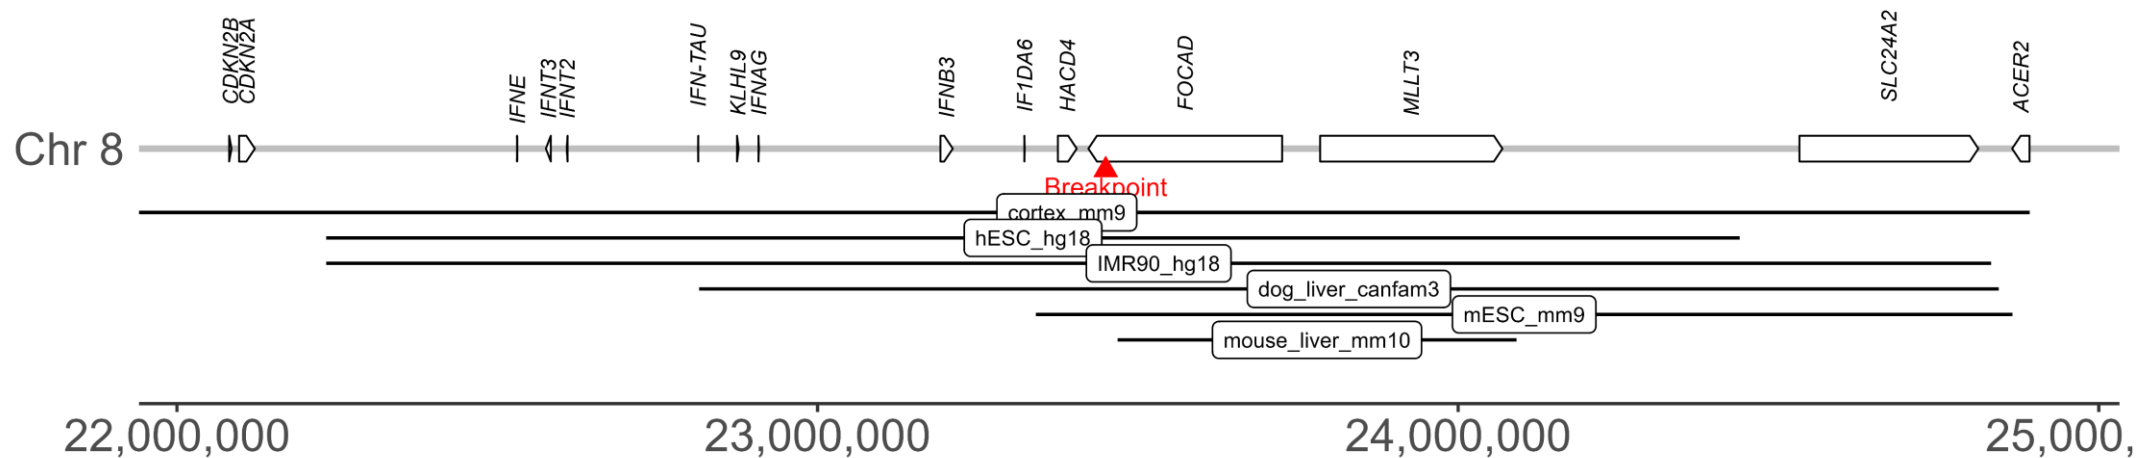

**Supplemental Figure 6 (continued).** (H) Annotated map of the chromosomal regions flanking the breakpoints for t(3;8) in bull Ma. Gene annotation has been obtained using Ensembl Biomart Tool. Information on TAD locations has been determined by orthology comparison with human, mouse and dogs (Wang et al.,2018). The tool liftOver was used to convert the positions of bovine UMD3.1 to ARS-UCD1.2 assembly.

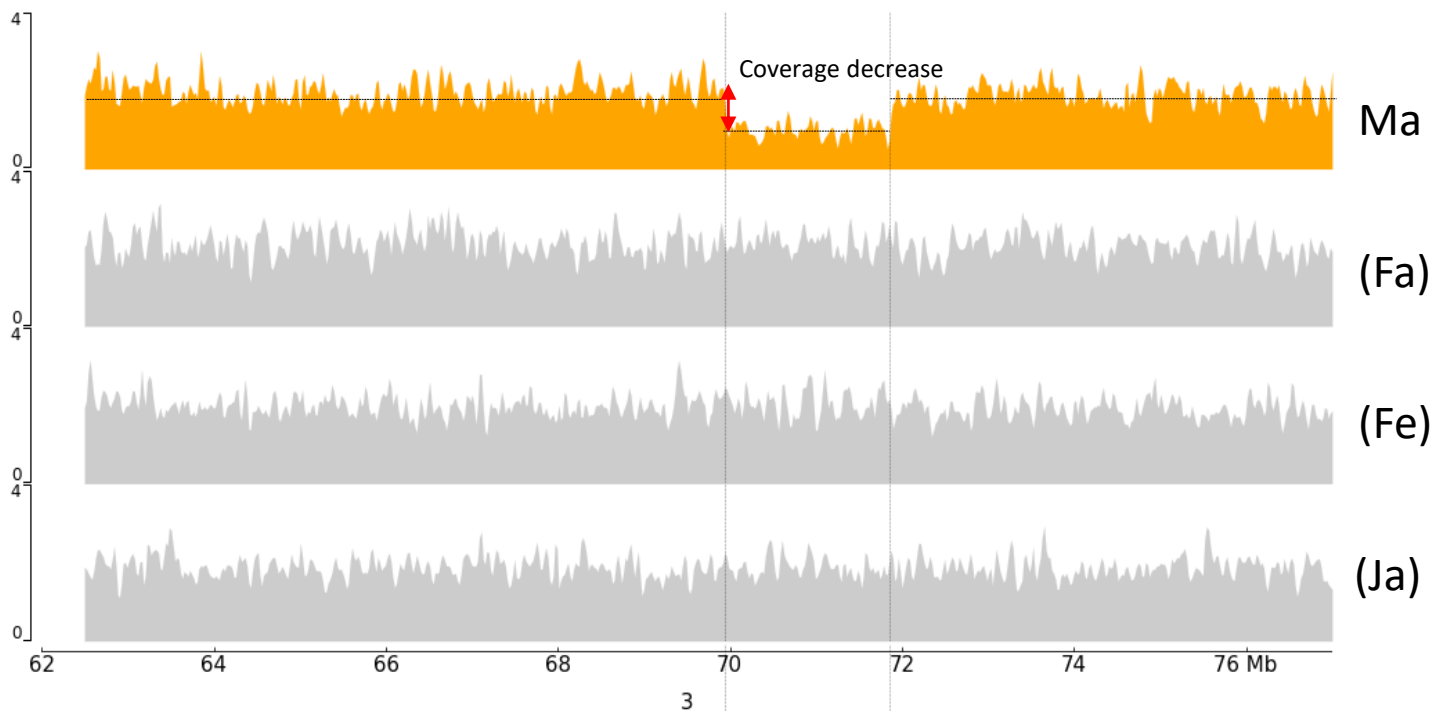

**Supplemental Figure S6 (continued).** (I) Coverage rate analysis around chimeric reads in the sequence of Ma compared to three control sequences. Note the coverage decrease between 79.9 and 81.9 Mb.

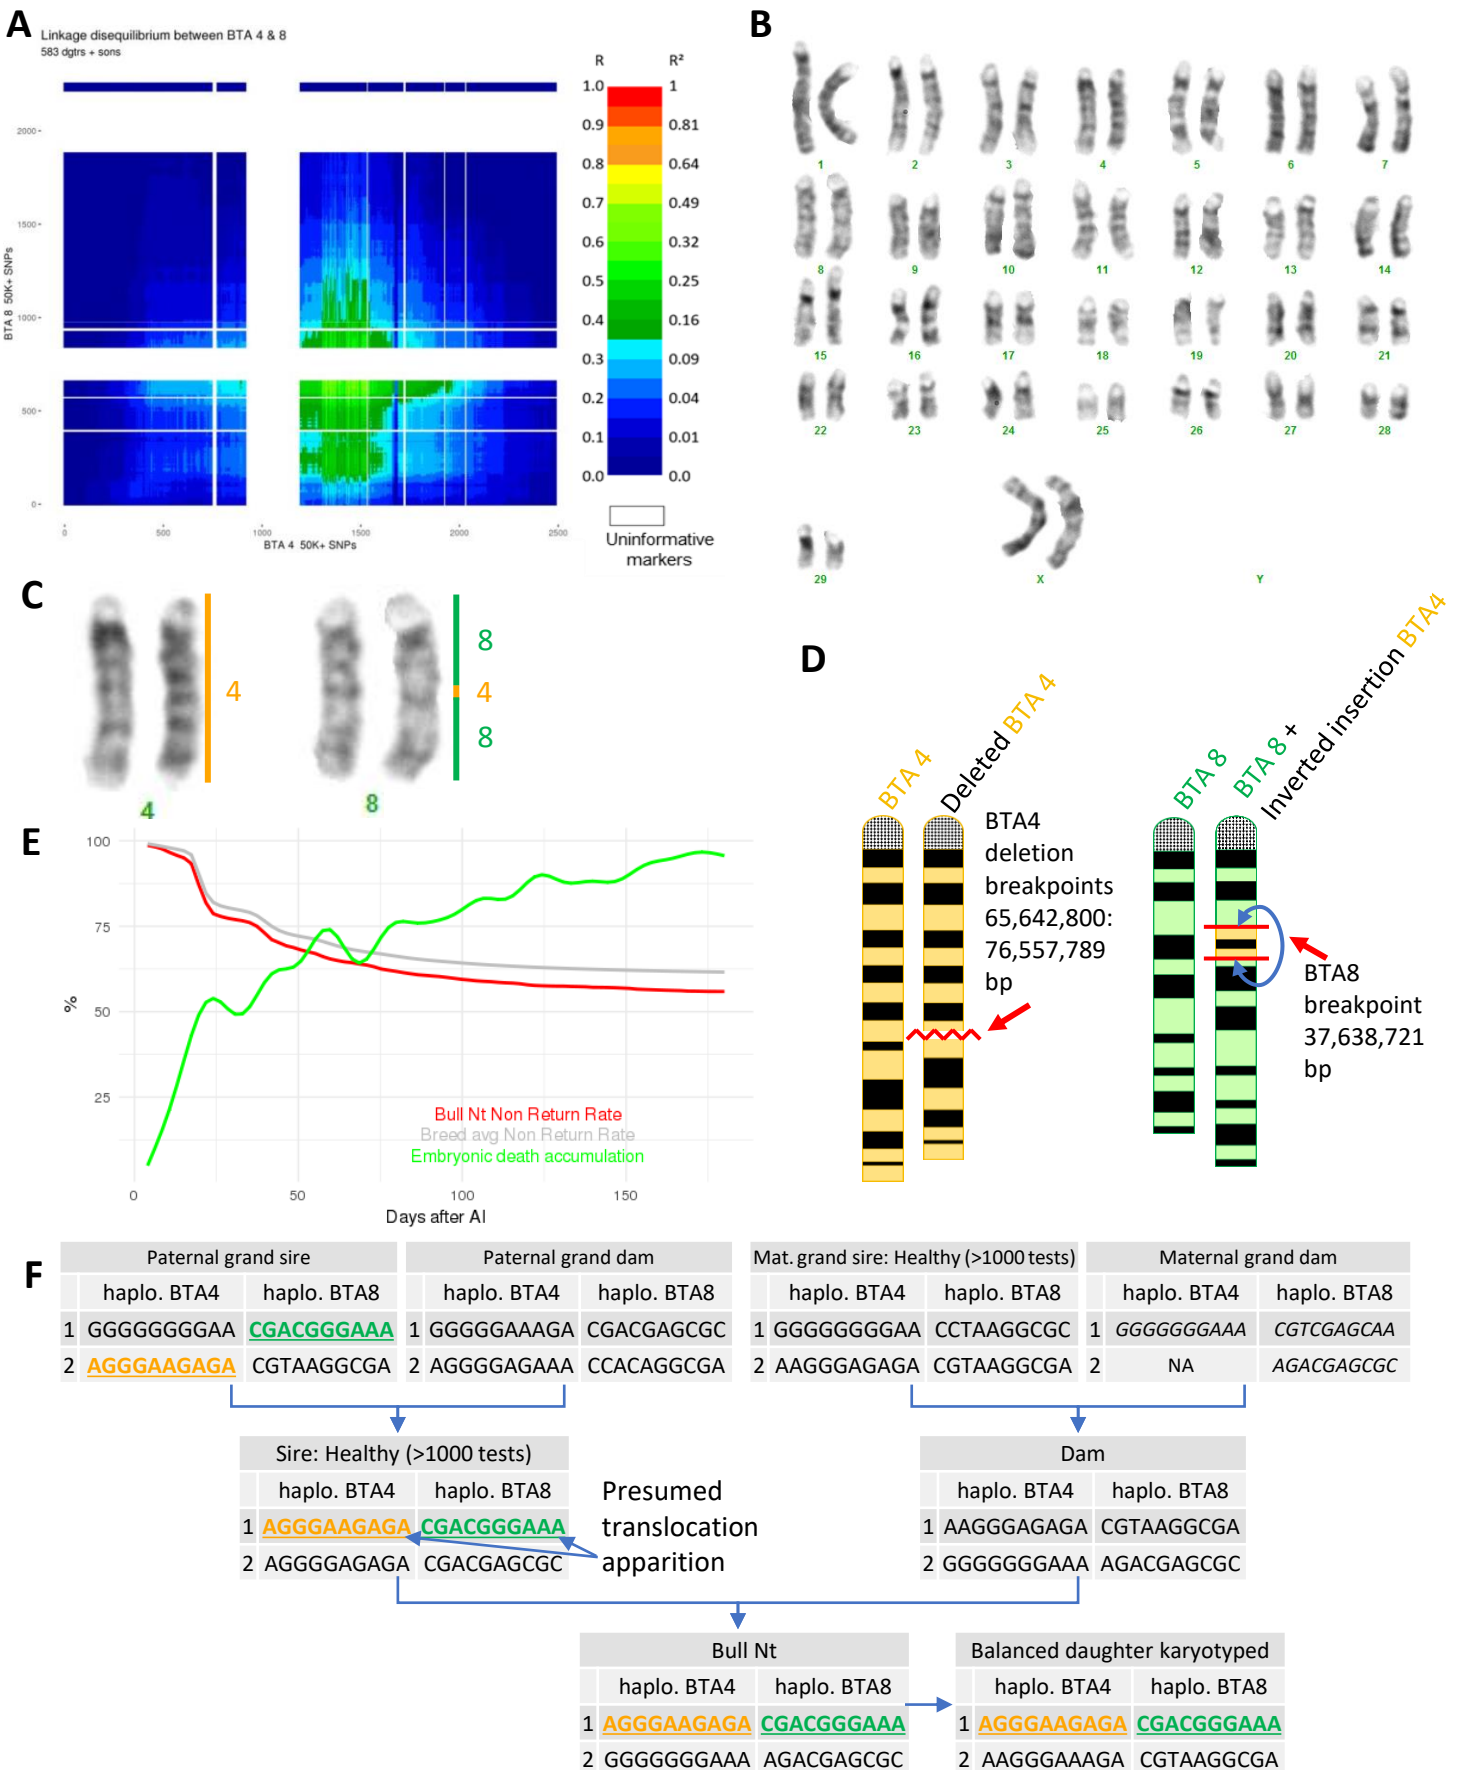

**Supplemental Figure S7. Information on inv ins (8;4) and bull Nt.** (A) Linkage disequilibrium heat map. (B), (C) Complete GTG banding karyotype of an affected daughter of Nt and annotated close-up of the rearranged chromosomes. (D) Schematic representation of the rearranged chromosome combining information from cytogenetic analyses and long-read sequencing. (E) Daily non-return rate of inseminations performed with the semen of Nt semen compared to the average non-return rate of the breed. (F) Analysis of the transmission of the segments involved in IR in the pedigree of Nt based on haplotype information. 1) and 2) refer to the paternal and maternal phases, respectively. Haplotypes involved in the rearrangement are shown in bold and underlined. They are colored to match those of the original chromosomes. Italic haplotypes are inferred from the genotypes of relatives. Note that bull Nt inherited the two haplotypes in LD with the translocation from its sire, which showed normal LD pattern in our initial screen. We concluded that the bull Nt was the first mutant and that the rearrangement was the result of an abnormal male meiosis.

Breakpoint BTA4:65,642,800 bp

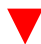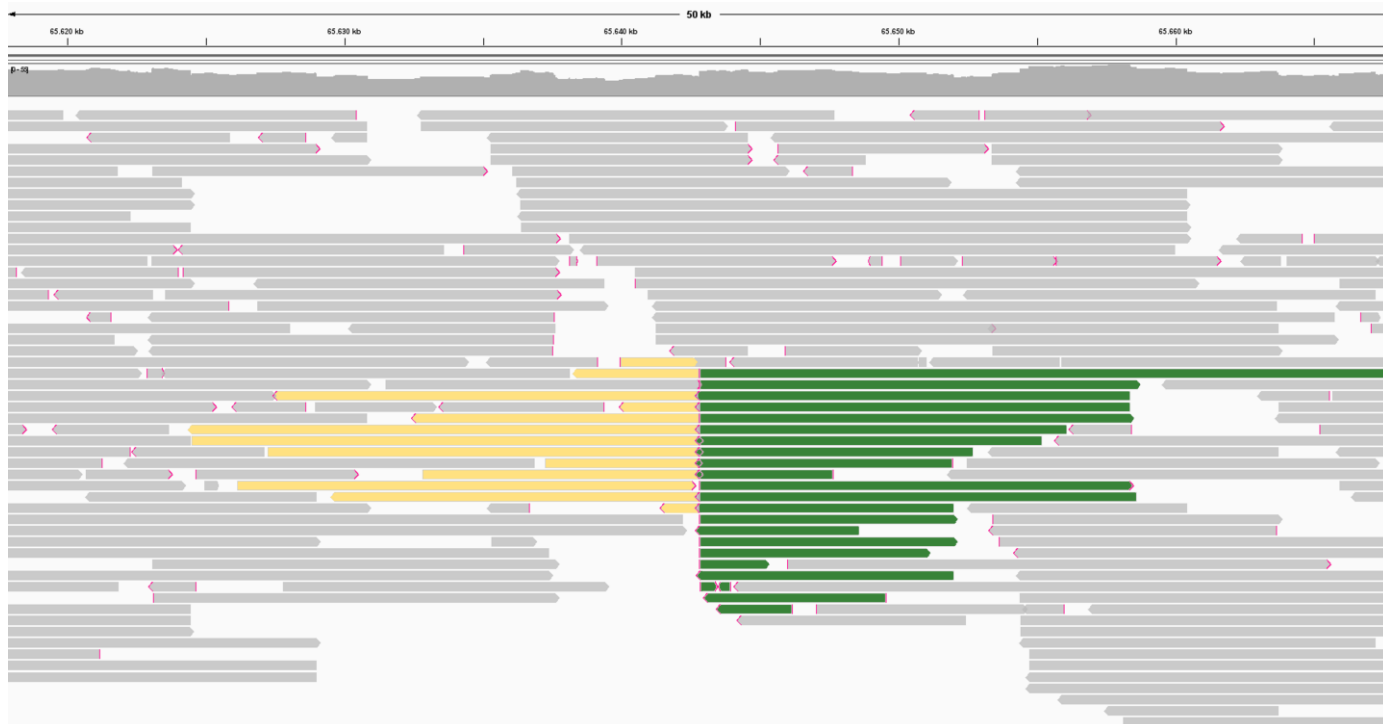

Breakpoint BTA4:76,557,789 bp

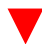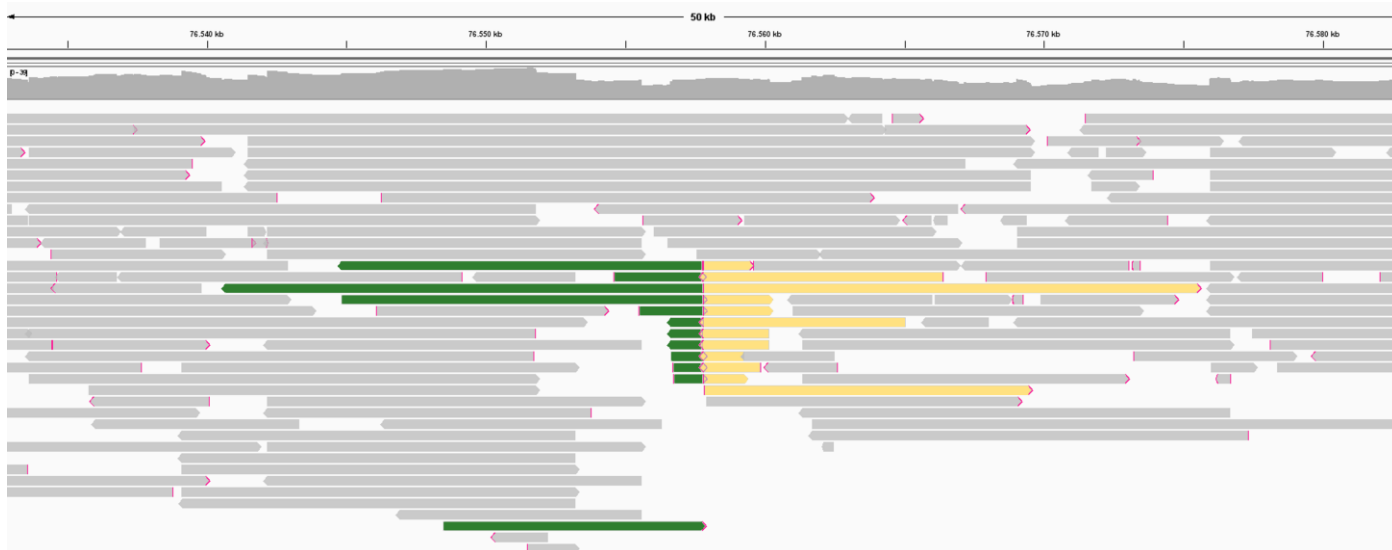

**Supplemental Figure S7 (continued).** (G) IGV screenshot of long read sequence alignments around the breakpoints +/-50kb on BTA4 and BTA8. Reads with partial alignment on the reciprocally translocated chromosome are highlighted in yellow and green.

Breakpoint BTA8:37,638,721 bp

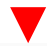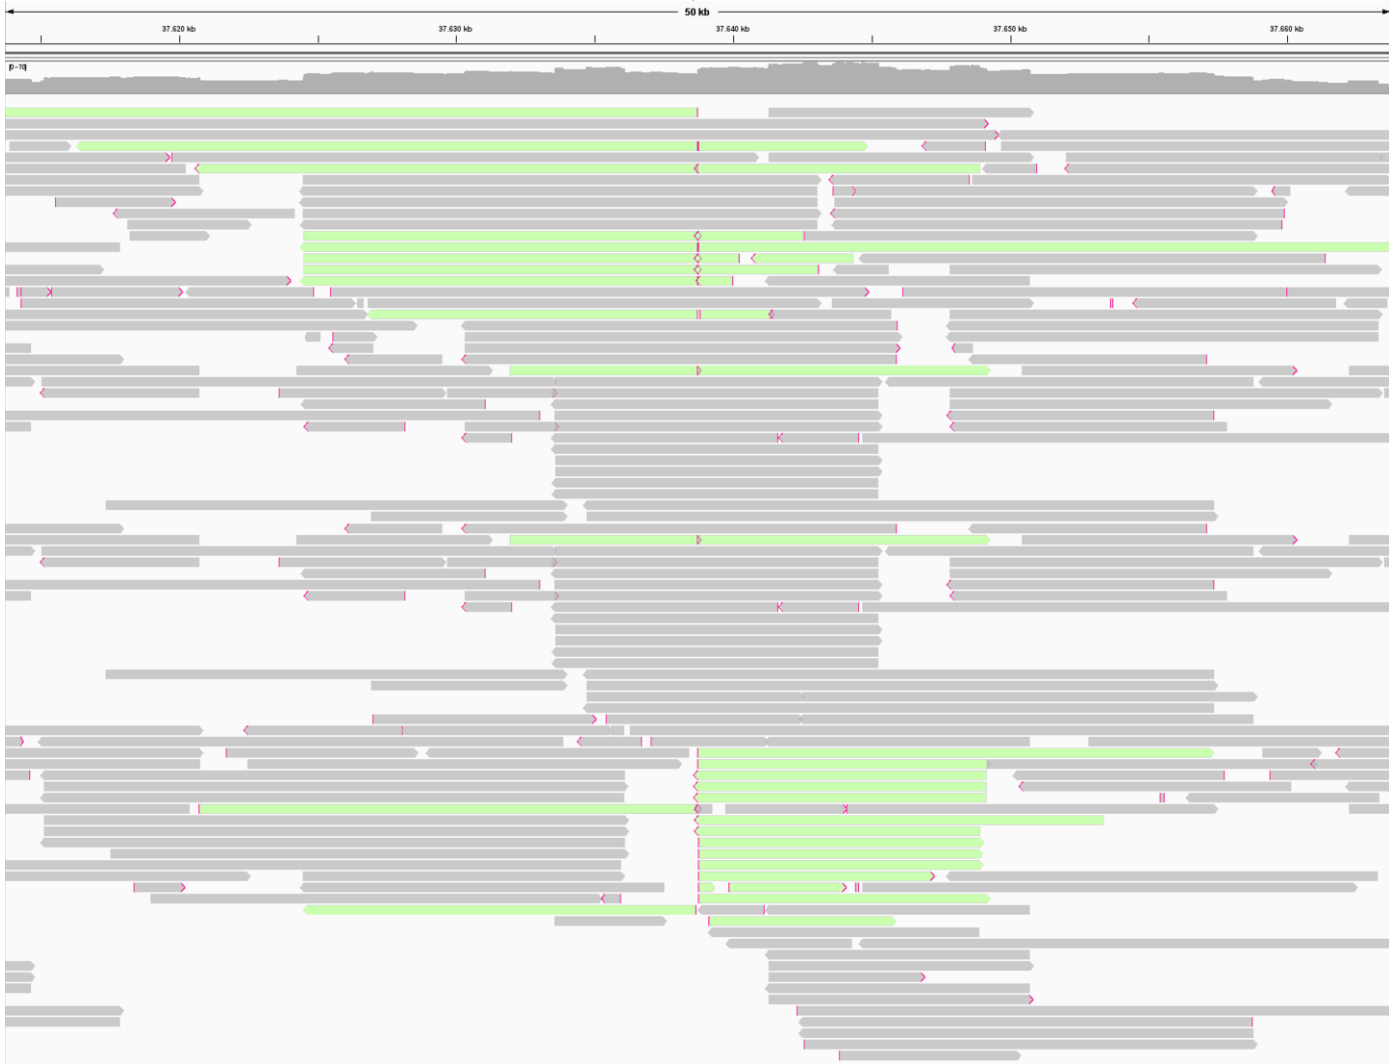

**Supplemental Figure S7 (continued).** (G) IGV screenshot of long read sequence alignments around the breakpoints +/-50kb on BTA4 and BTA8. Reads with partial alignment on the reciprocally translocated chromosome are highlighted in yellow and green.

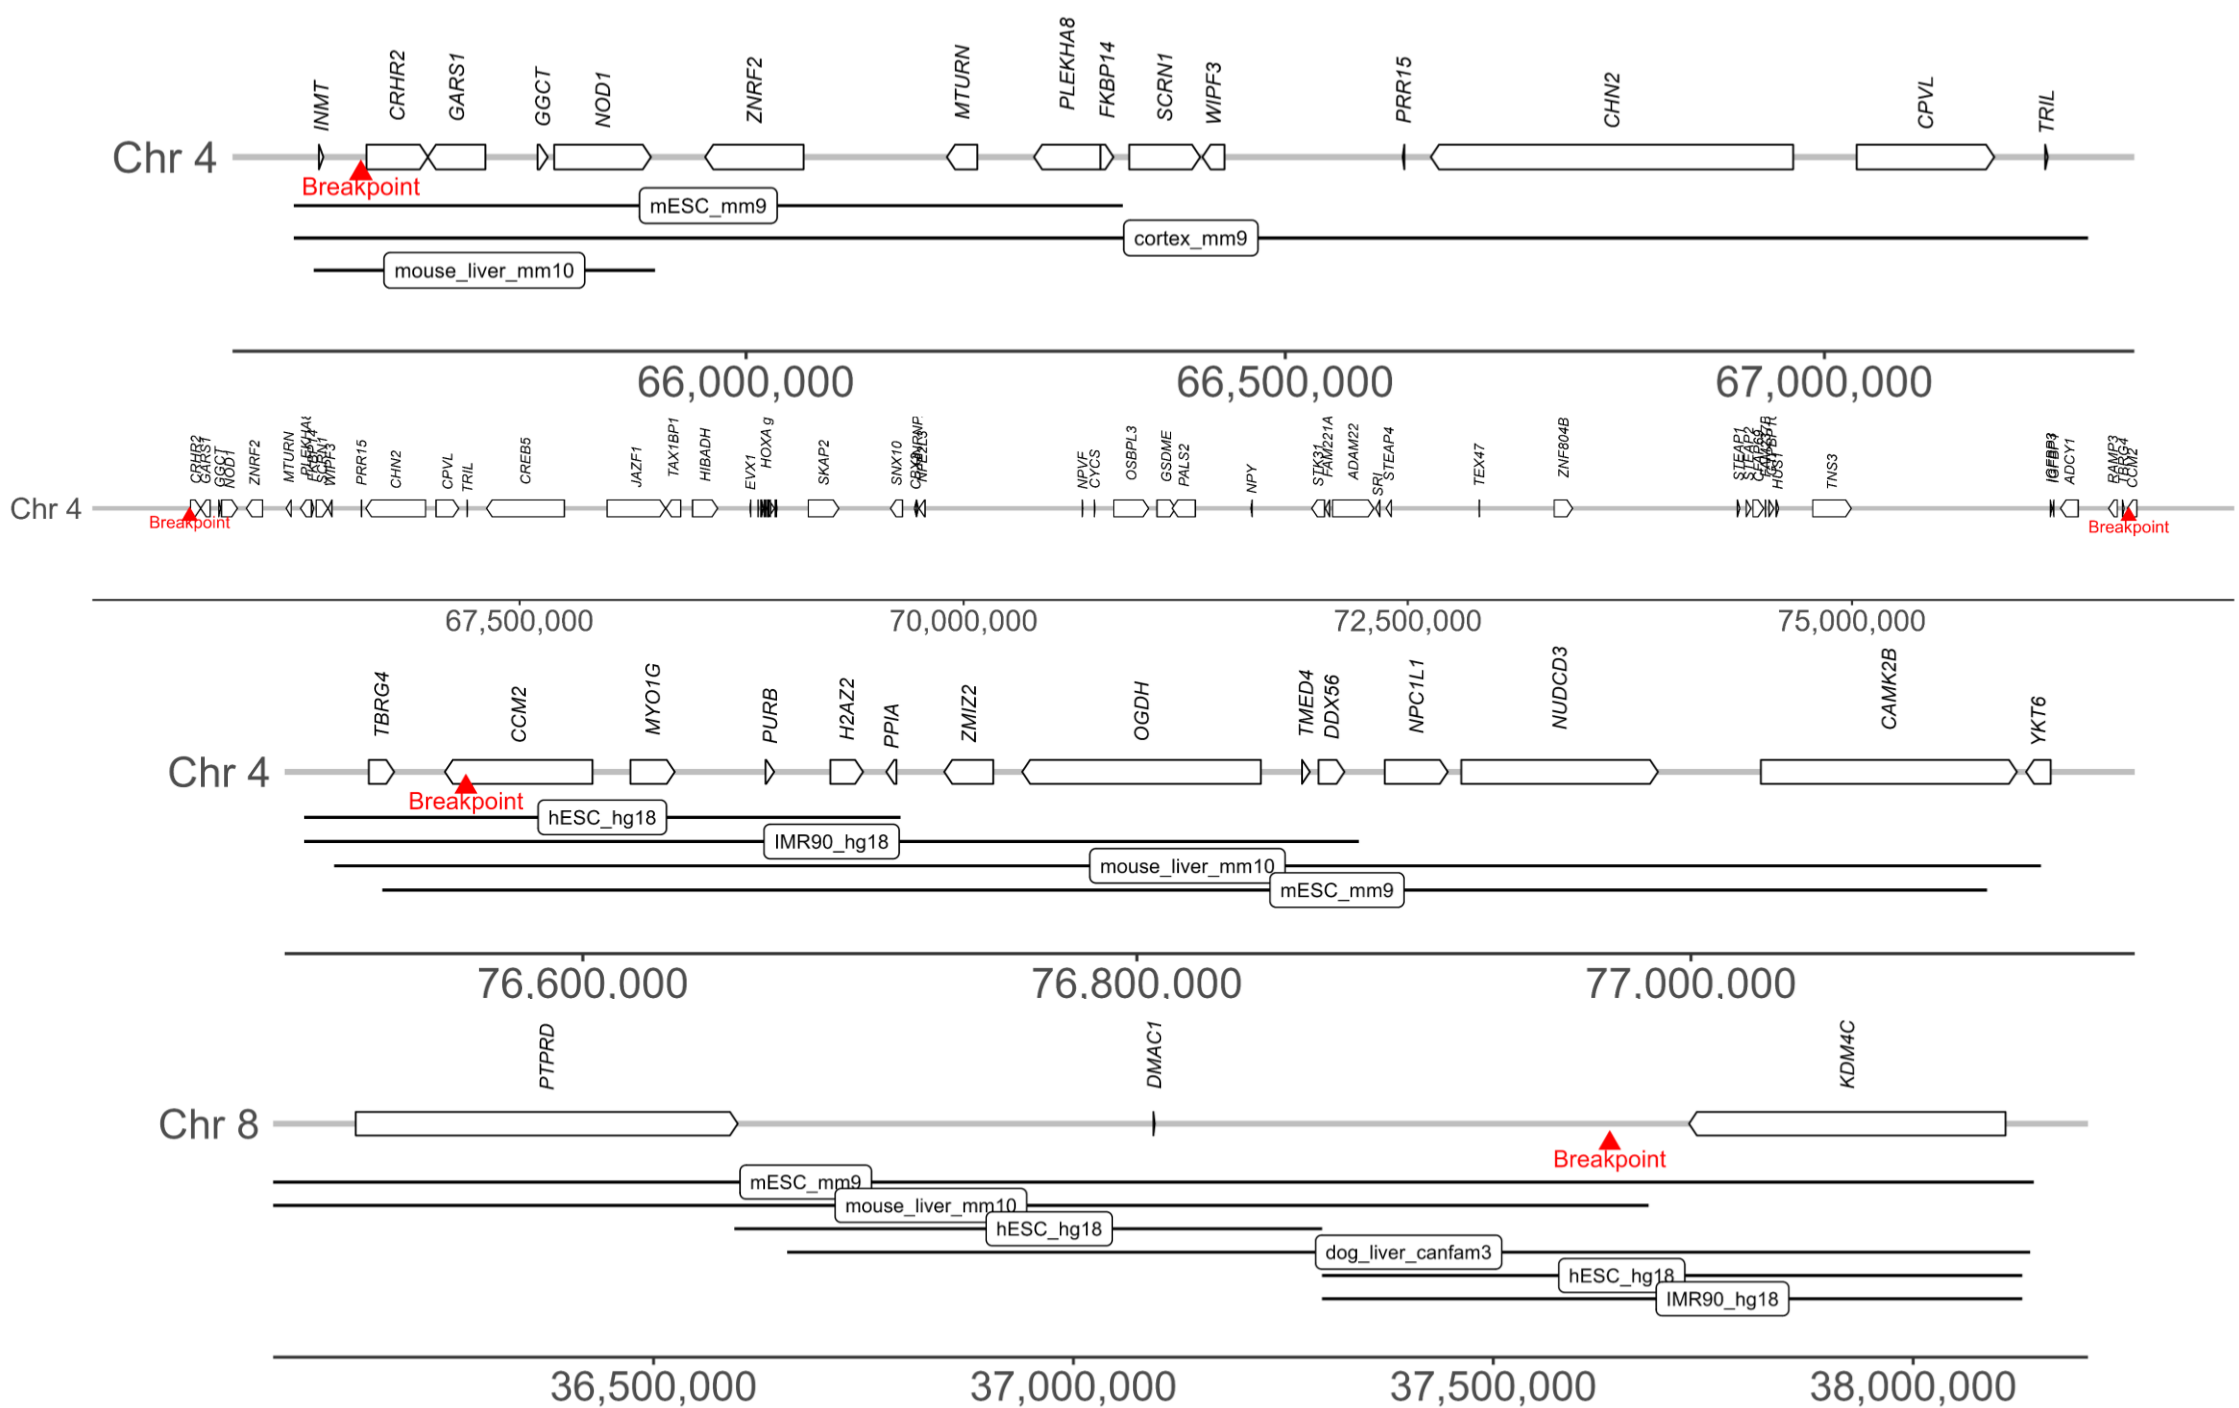

**Supplemental Figure 7 (continued).** (H) Annotated map of the chromosomal regions flanking the breakpoints for inv ins (8;4) in bull Nt. Gene annotation has been obtained using Ensembl Biomart Tool. Information on TAD locations has been determined by orthology comparison with human, mouse and dogs (Wang et al., 2018). The tool liftOver was used to convert the positions of bovine UMD3.1 to ARS-UCD1.2 assembly.



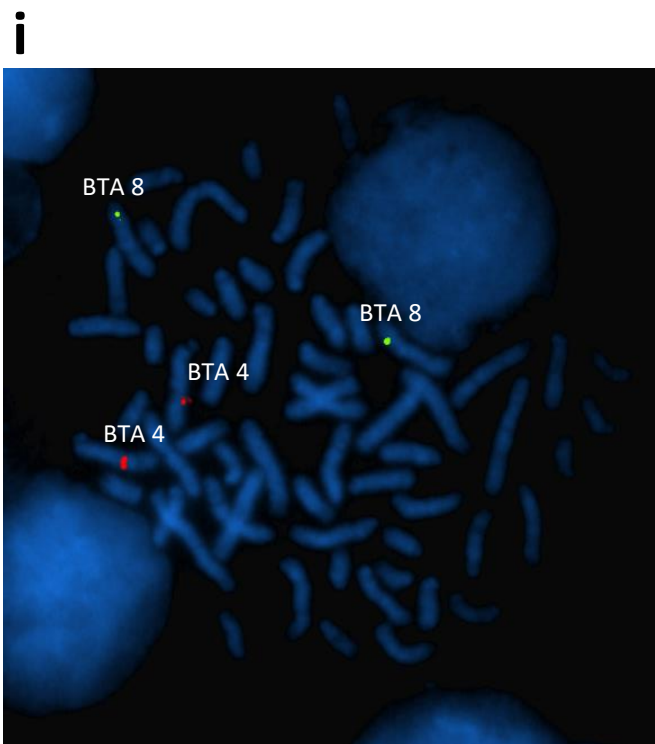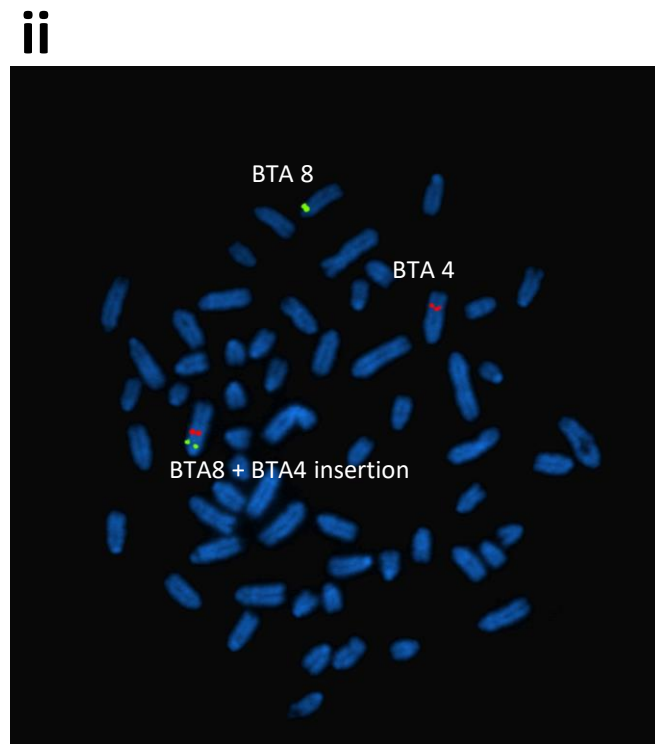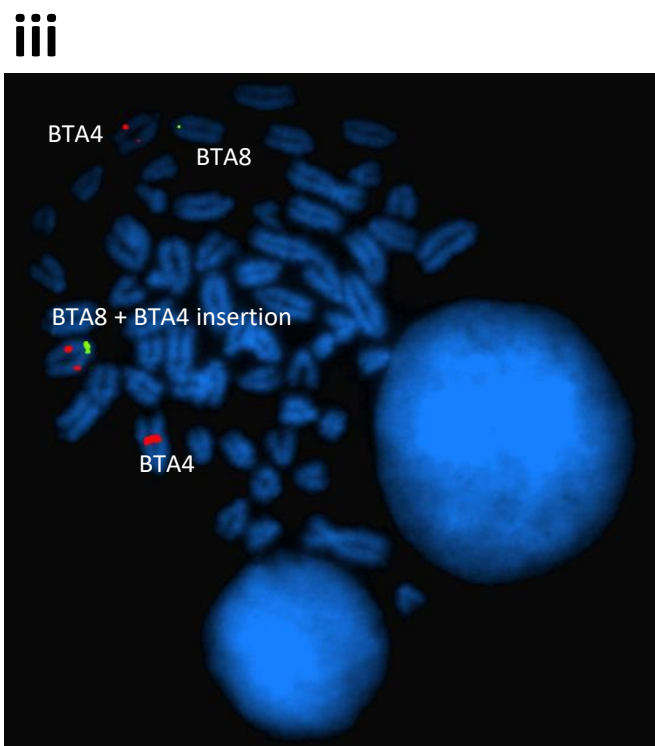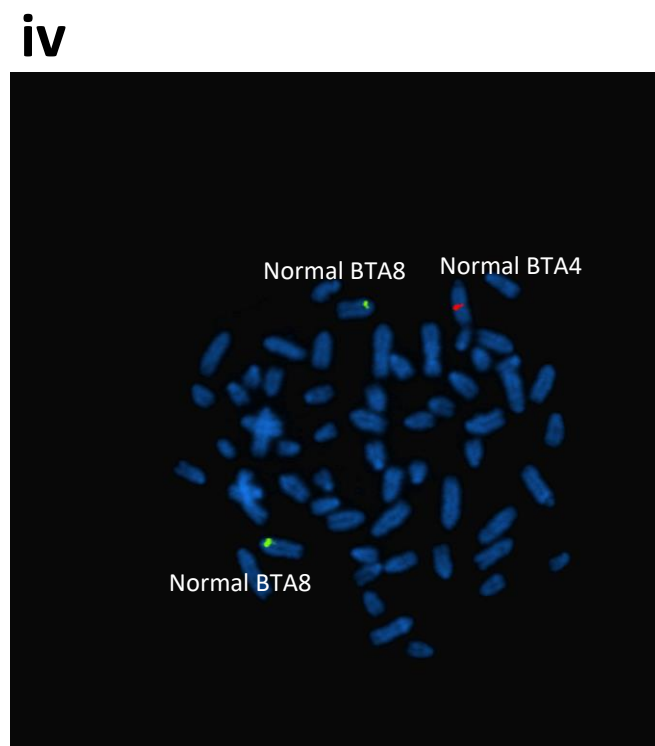

**Supplemental Figure S7 (continued).** (J) Full view of FISH (Fluorescence *In Situ* Hybridization) performed on Nt's daughters.

i: non-affected daughter (wild type).

ii: balanced daughter.

iii: partially trisomic daughter.

iv: partially monosomic daughter.

Green spots are hybridized in BTA8 centromere.

Red spots are hybridized in the specific translocated and inverted region of BTA4.

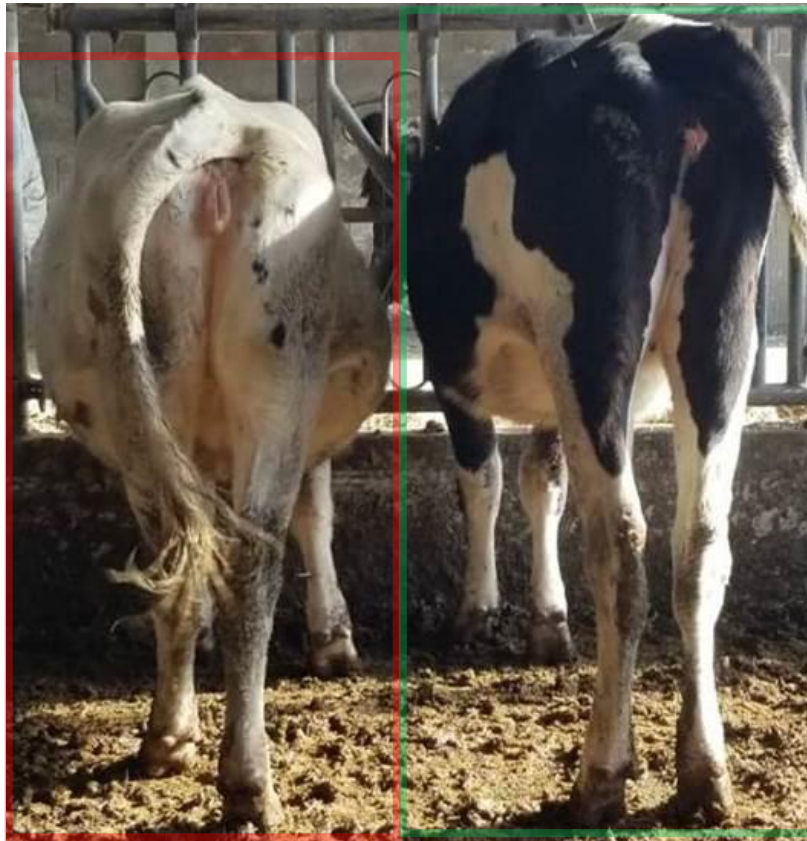

Left heifer (red frame): Nt's balanced daughter, 15.0 months  
Right heifer (green frame): control heifer, 15.1 months

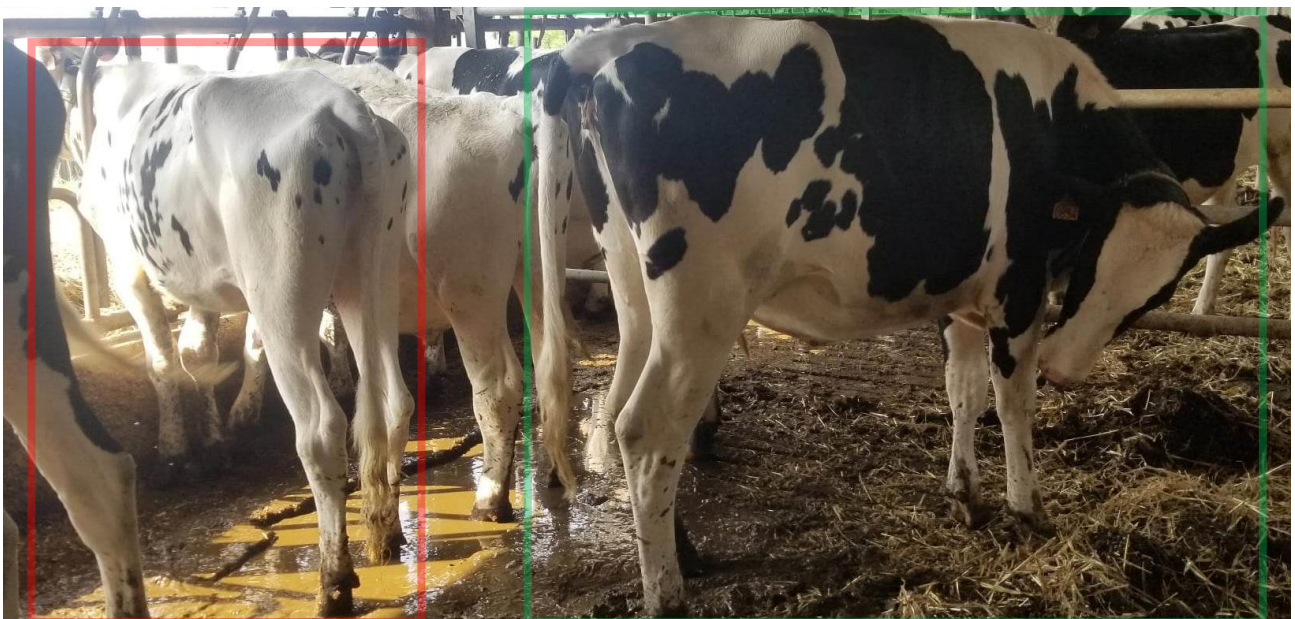

Left heifer (red frame): Nt's partially monosomic daughter, 18.7 months  
Right heifer (green frame): control heifer, 16.3 months

**Supplemental Figure S7 (continued).** (K) Pictures of affected Nt's daughters

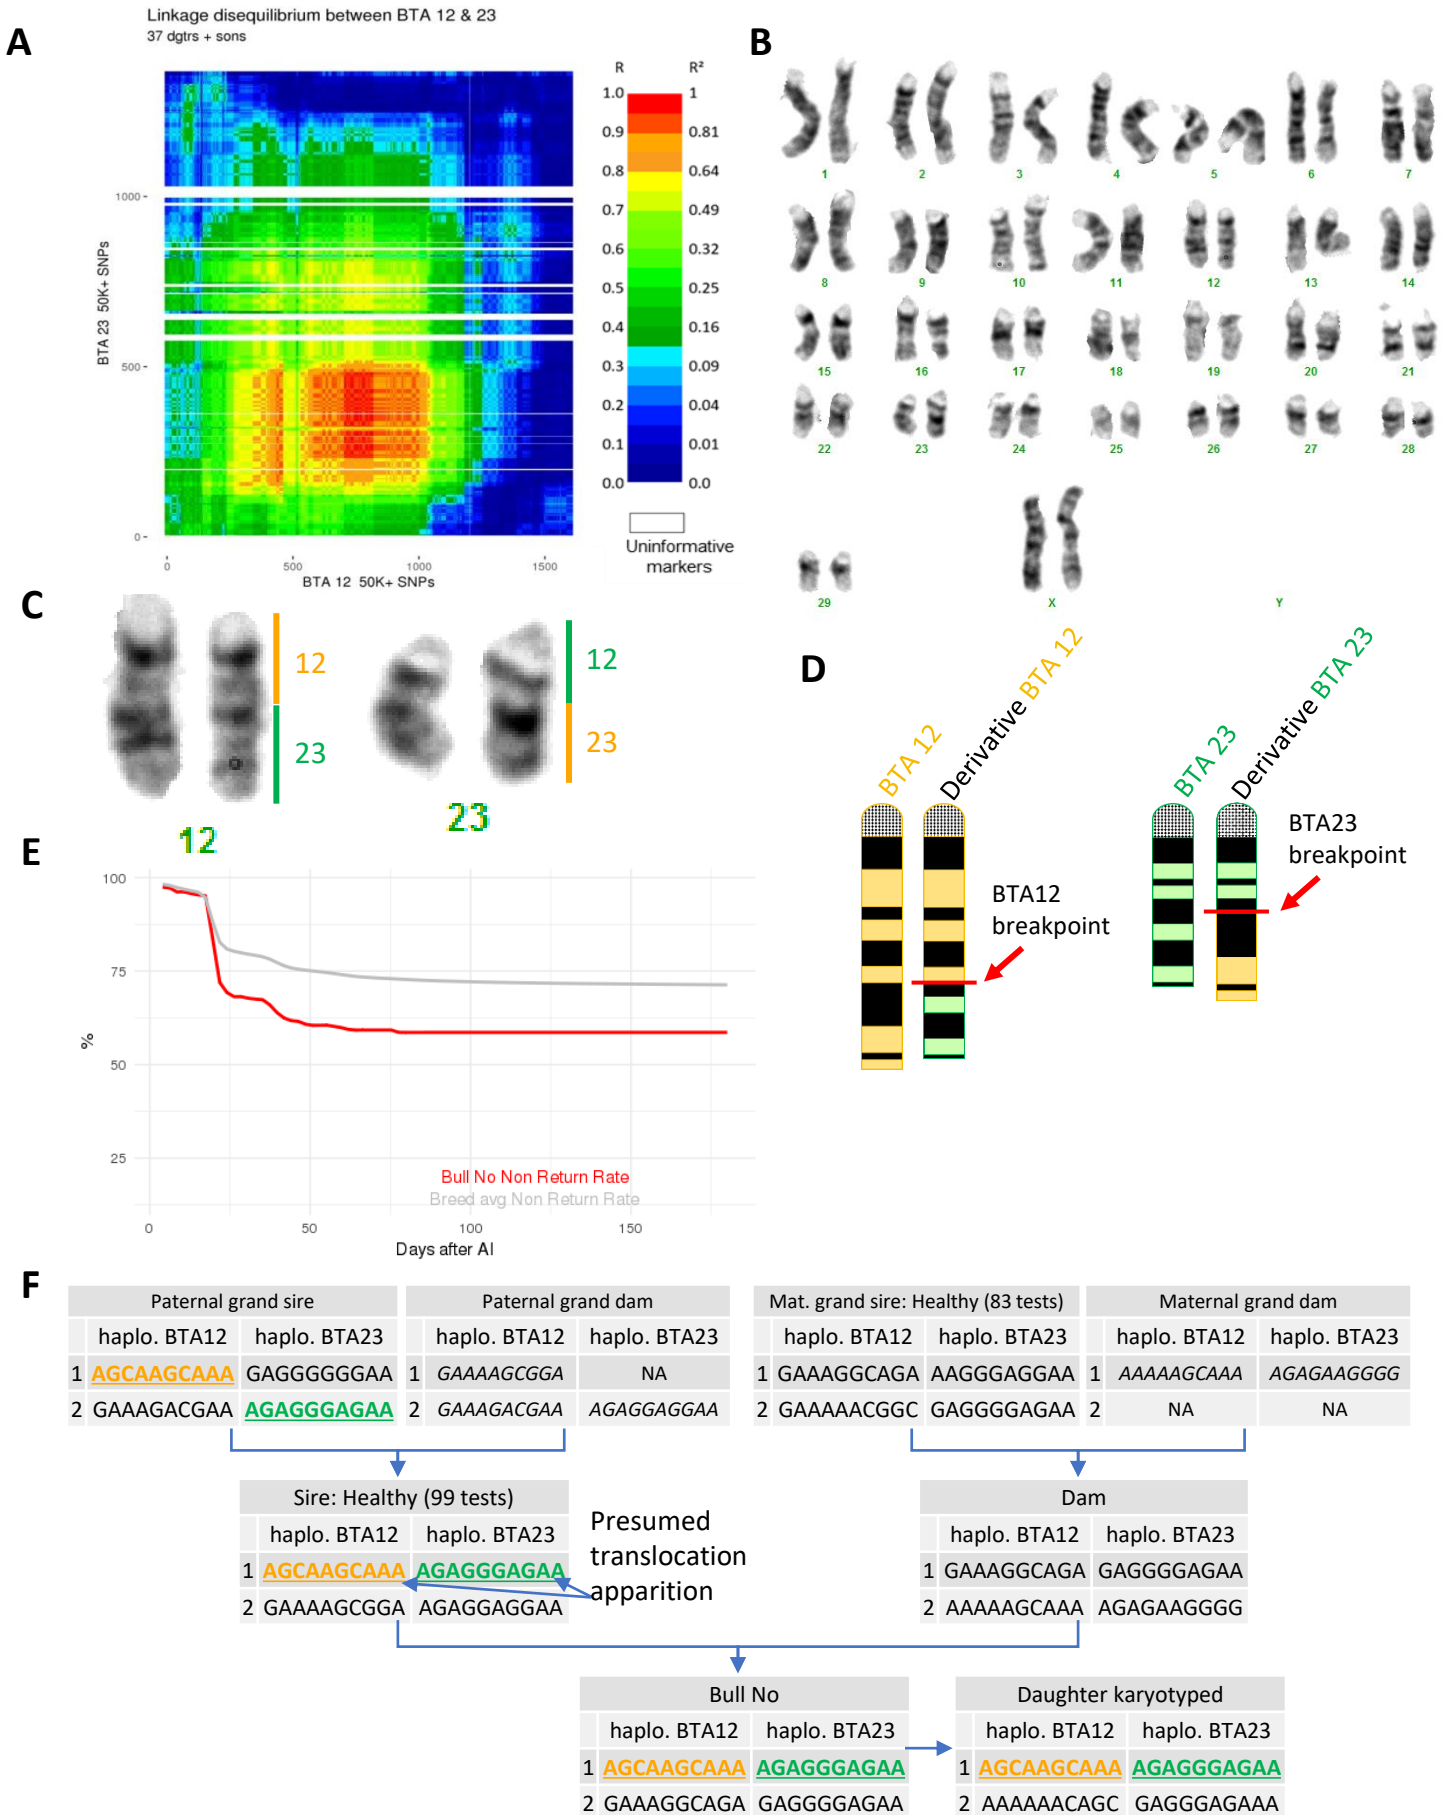

**Supplemental Figure S8. Information on t(12;23) and bull No.** (A) Linkage disequilibrium heat map. (B), (C) Complete GTG banding karyotype of an affected daughter of No and annotated close-up of the rearranged chromosomes. (D) Schematic representation of the rearranged chromosome combining information from cytogenetic analyses and long-read sequencing. (E) Daily non-return rate of inseminations performed with the semen of No semen compared to the average non-return rate of the breed. (F) Analysis of the transmission of the segments involved in IR in the pedigree of No based on haplotype information. 1) and 2) refer to the paternal and maternal phases, respectively. Haplotypes involved in the rearrangement are shown in bold and underlined. They are colored to match those of the original chromosomes. Italic haplotypes are inferred from the genotypes of relatives.

Note that bull No inherited the two haplotypes in LD with the translocation from its sire, which showed normal LD pattern in our initial screen. We concluded that the bull No was the first mutant and that the rearrangement was the result of an abnormal male meiosis.



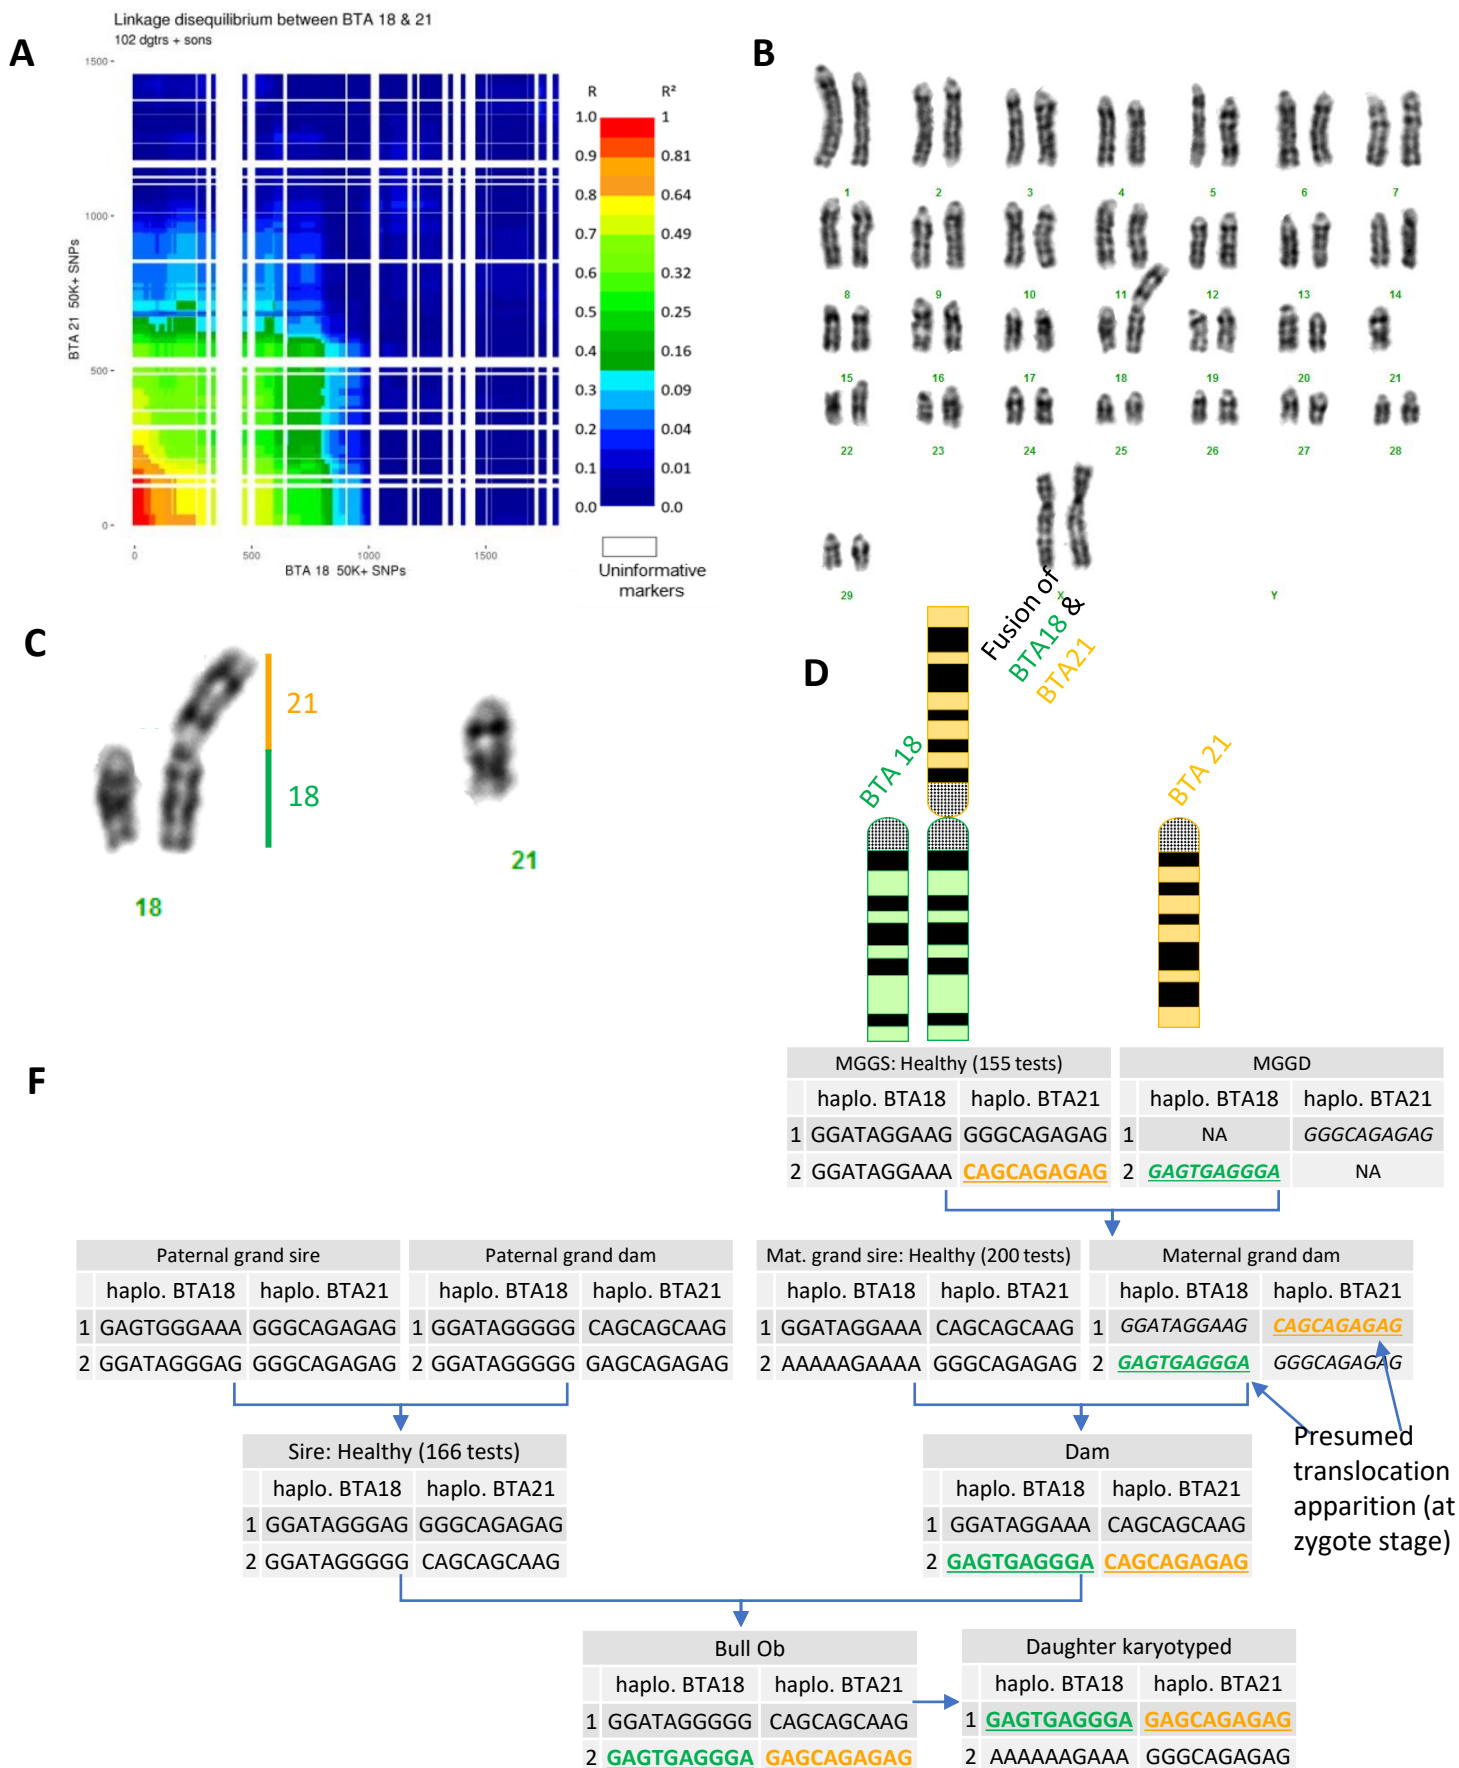

**Supplemental Figure S9. Information on Rob(18;21) and bull Ob.** (A) Linkage disequilibrium heat map. (B), (C) Complete GTG banding karyotype of an affected daughter of Ob and annotated close-up of the rearranged chromosomes. (D) Schematic representation of the rearranged chromosome using information from cytogenetic analyses. (F) Analysis of the transmission of the segments involved in IR in the pedigree of Ob based on haplotype information. 1) and 2) refer to the paternal and maternal phases, respectively. Haplotypes involved in the rearrangement are shown in bold and underlined. They are colored to match those of the original chromosomes. Italic haplotypes are inferred from the genotypes of relatives.

Note that the maternal grandmother of bull Ob was the first animal in which the haplotypes in linkage disequilibrium with the translocation co-occurred. The BTA18 haplotype was inherited from its own sire (which was genotyped) and the BTA21 haplotype from its dam (which was not genotyped). Furthermore, among seven genotyped offspring of this animal, we found only two combinations of BTA18-BTA21 haplotypes, instead of the four expected in the case of normal segregation. We concluded that the fusion probably occurred at the zygote stage in this female ancestor of Ob. Note also that panel E is missing due to insufficient number of AI to calculate the non-return rate.

Linkage disequilibrium between BTA 24 & 29  
145 dgrtrs + sons

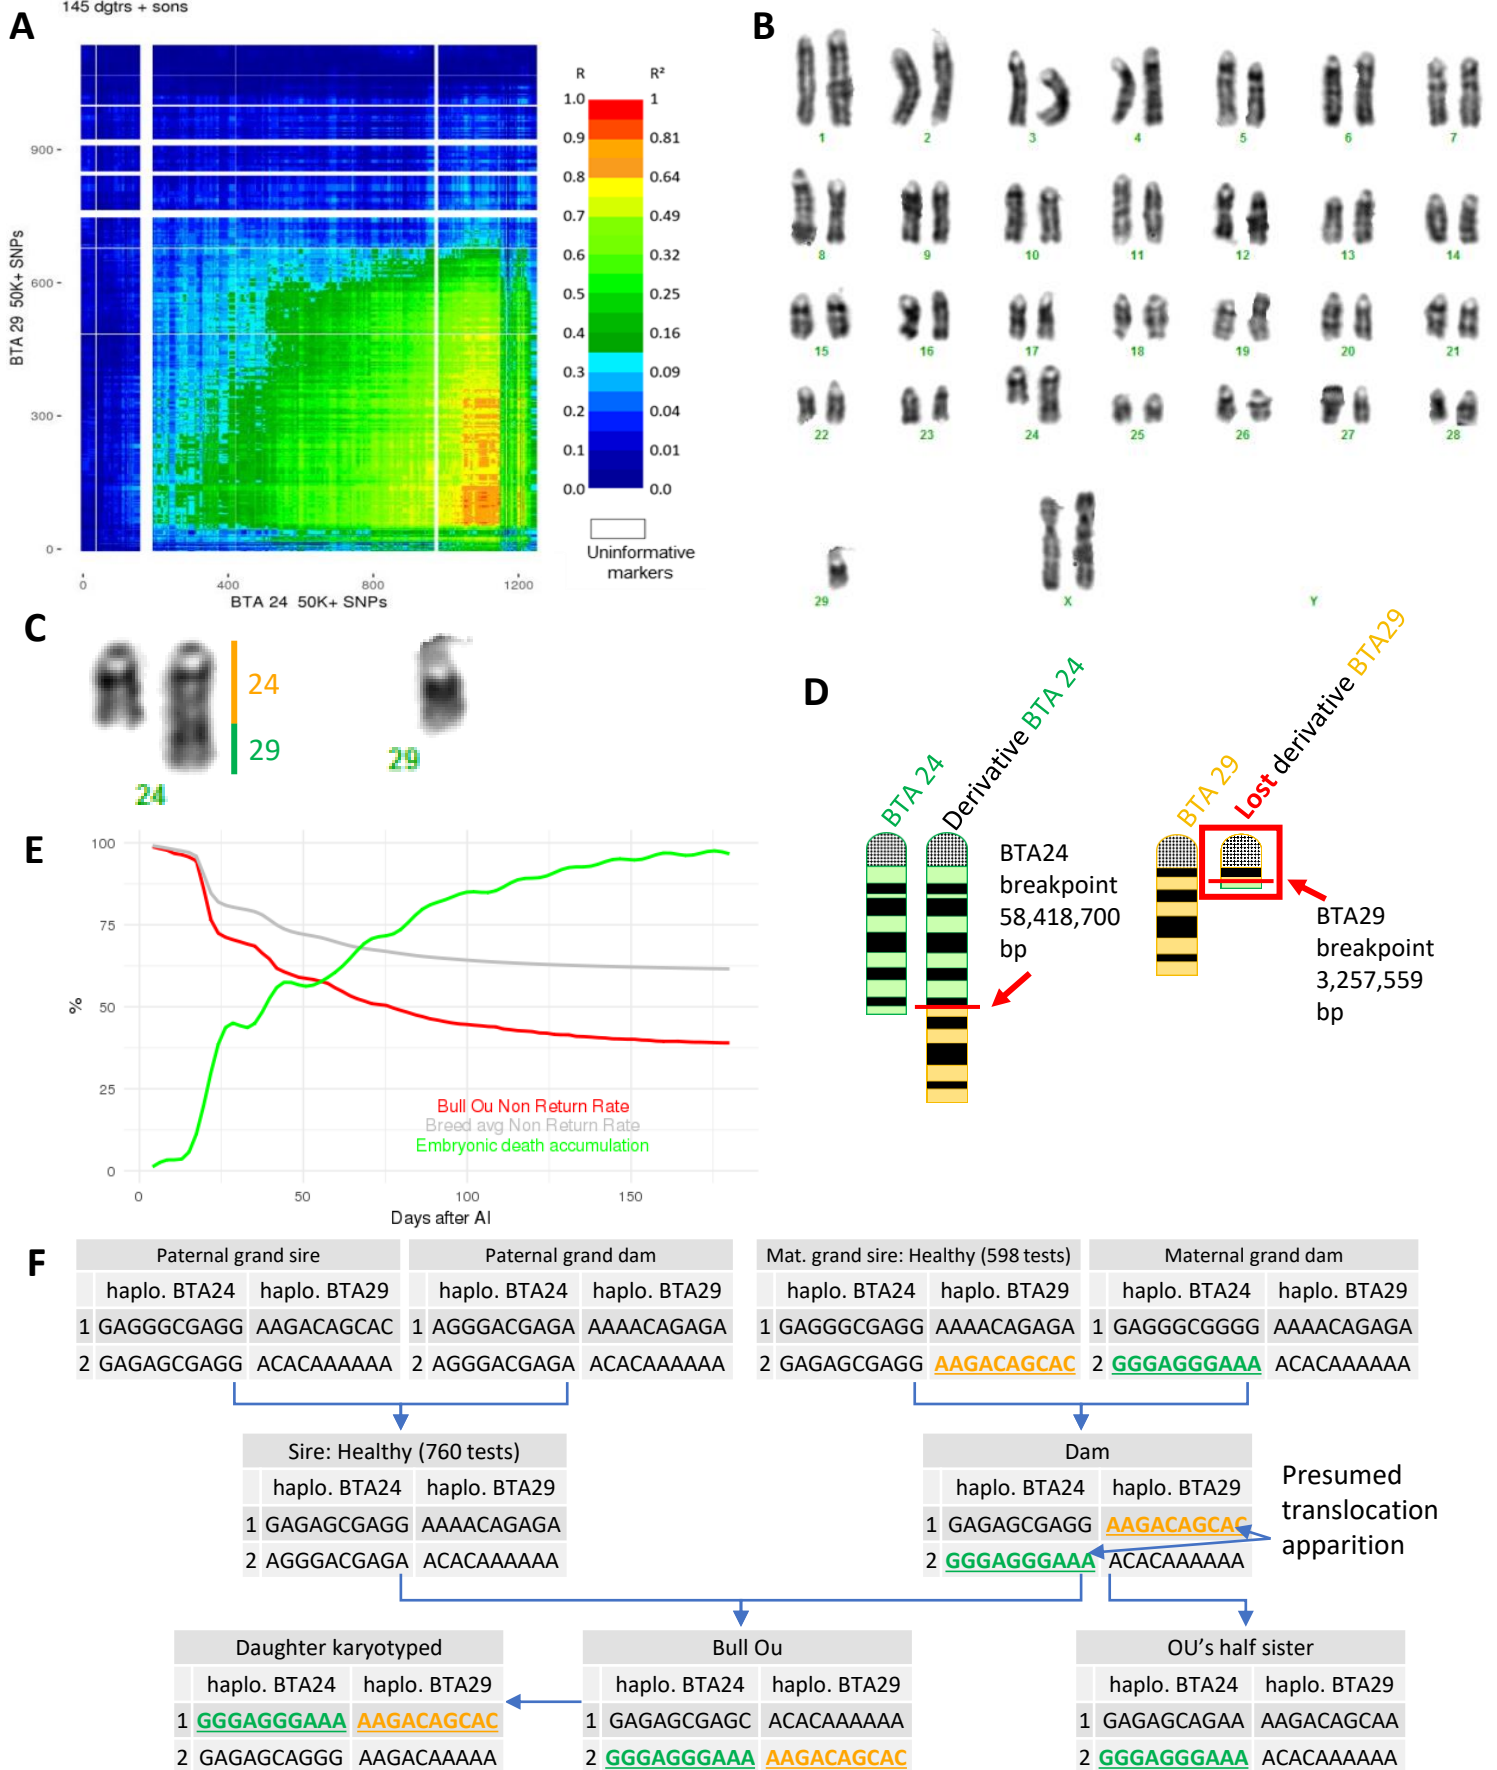

**Supplemental Figure S10. Information on t(24;29),-der29 and bull Ou.** (A) Linkage disequilibrium heat map. (B), (C) Complete GTG banding karyotype of an affected daughter of Ou and annotated close-up of the rearranged chromosomes. (D) Schematic representation of the rearranged chromosome combining information from cytogenetic analyses and long-read sequencing. (E) Daily non-return rate of inseminations performed with the semen of Ou semen compared to the average non-return rate of the breed. (F) Analysis of the transmission of the segments involved in IR in the pedigree of Ou based on haplotype information. 1) and 2) refer to the paternal and maternal phases, respectively. Haplotypes involved in the rearrangement are shown in bold and underlined. They are colored to match those of the original chromosomes. Italic haplotypes are inferred from the genotypes of relatives.

Note that bull Ou inherited the two haplotypes in LD with the translocation from its dam, which had other progeny carrying four different combinations of haplotypes, such as the half-sister shown which received only one of the haplotypes in LD with the IR (namely on BTA24). We concluded that the bull Ou was the first mutant and that the rearrangement was the result of an abnormal female meiosis.

Breakpoint BTA24:58,418,700 bp

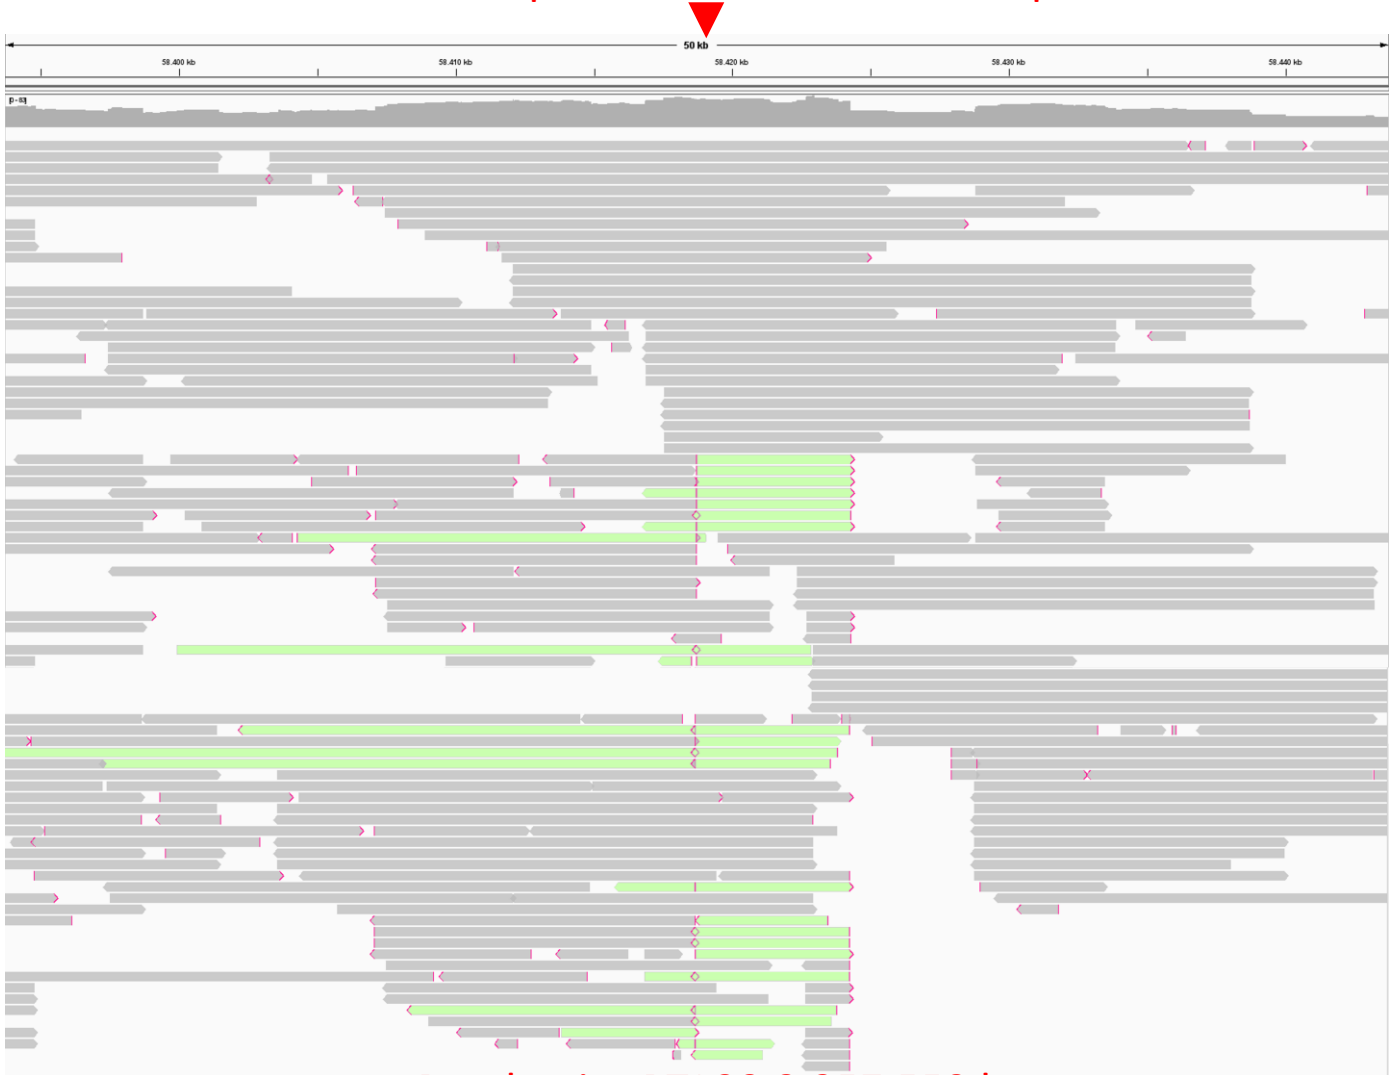

Breakpoint BTA29:3,257,559 bp

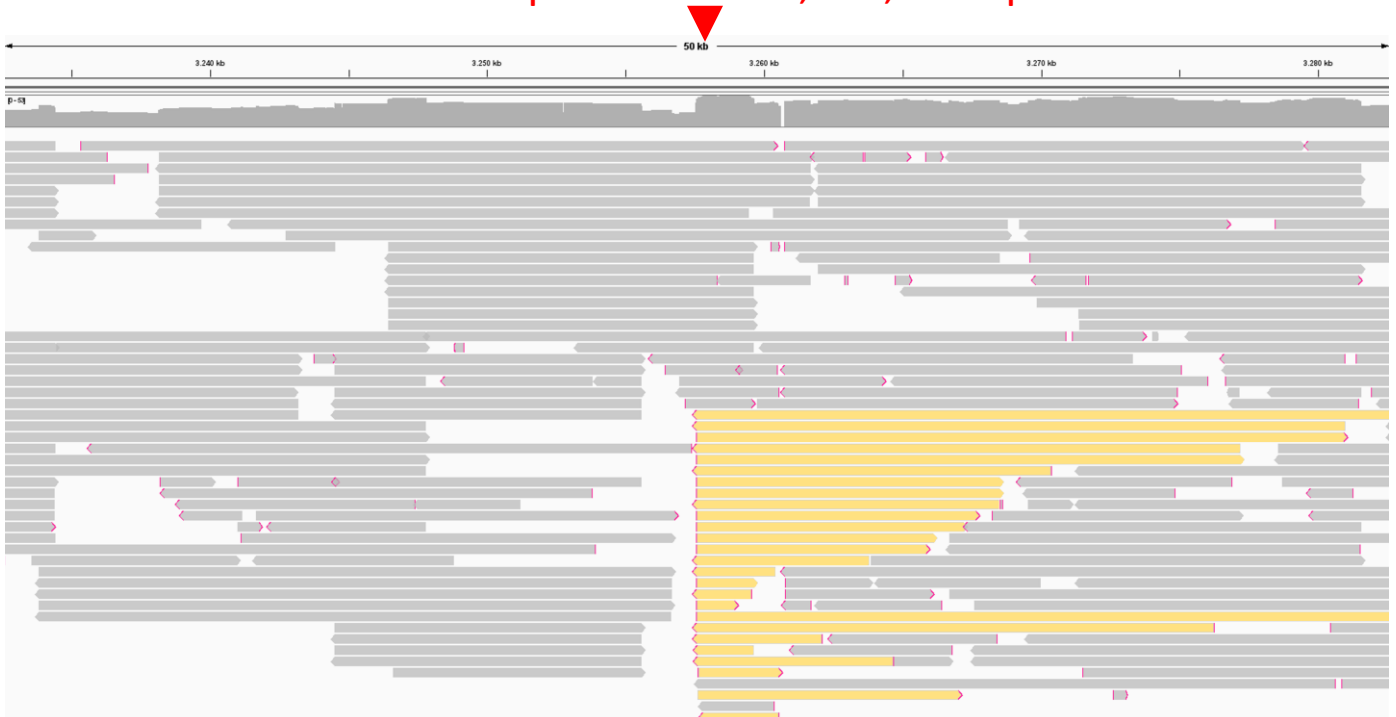

**Supplemental Figure S10 (continued).** (G) IGV screenshot of long read sequence alignments around the breakpoints +/-50kb on BTA24 and BTA29. Reads with partial alignment on the reciprocally translocated chromosome are highlighted in yellow and green.

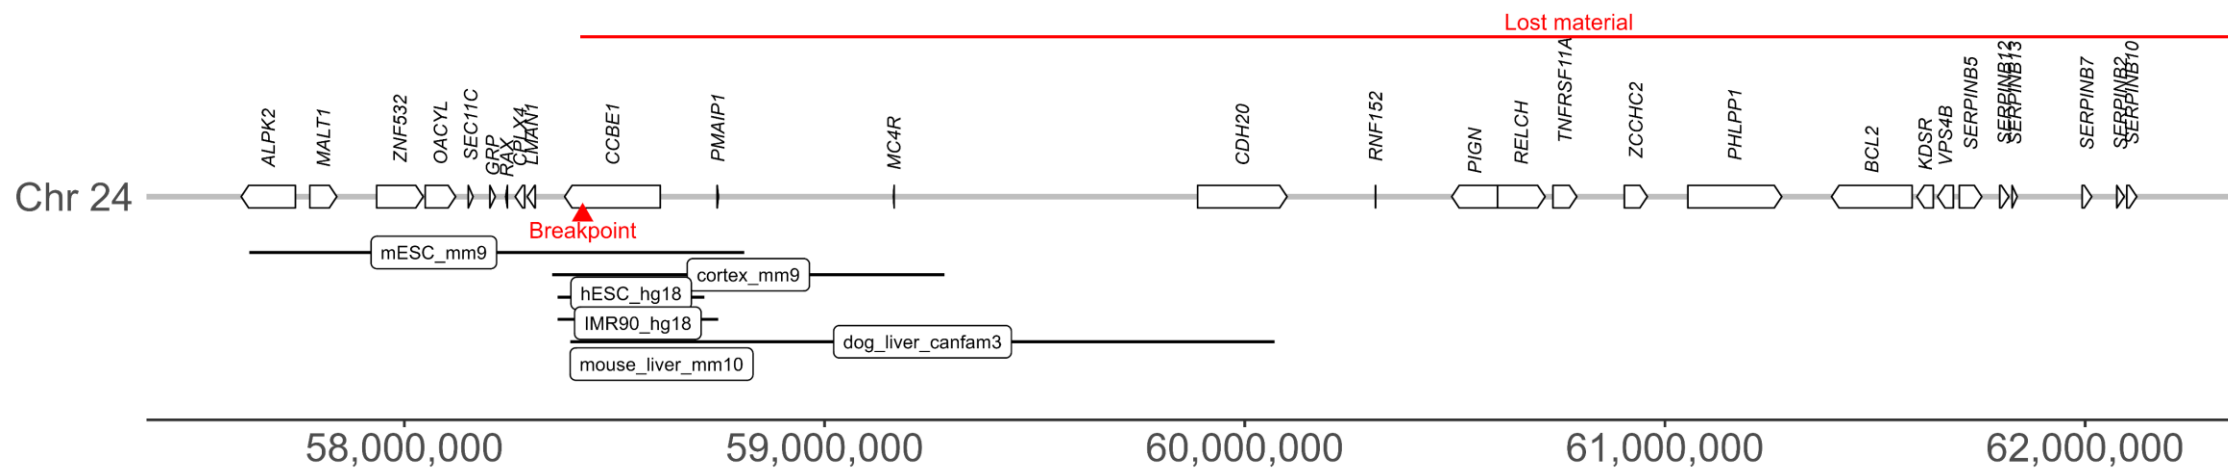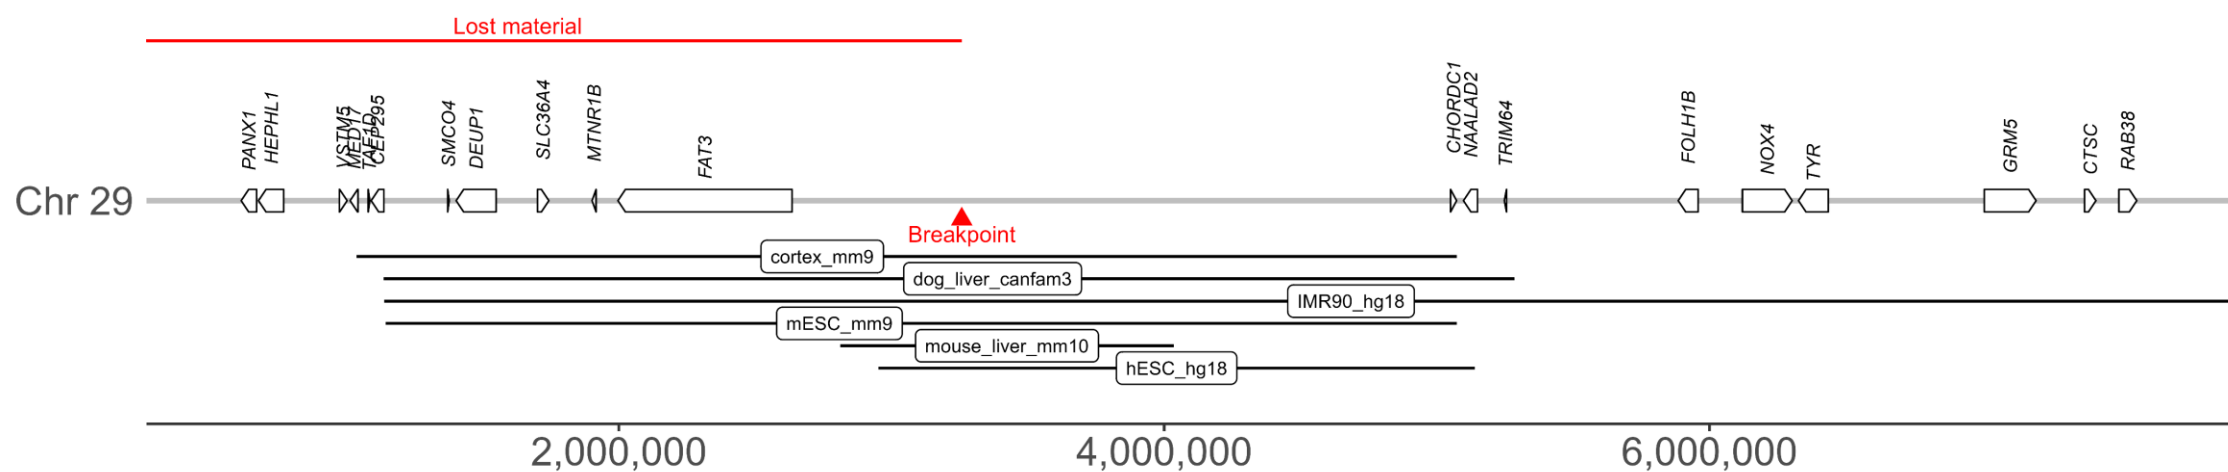

**Supplemental Figure 10 (continued).** (H) Annotated map of the chromosomal regions flanking the breakpoints for t(24;29) -der29 in bull Ou. Gene annotation has been obtained using Ensembl Biomart Tool. Information on TAD locations has been determined by orthology comparison with human, mouse and dogs (Wang et al.,2018). The tool liftOver was used to convert the positions of bovine UMD3.1 to ARS-UCD1.2 assembly.



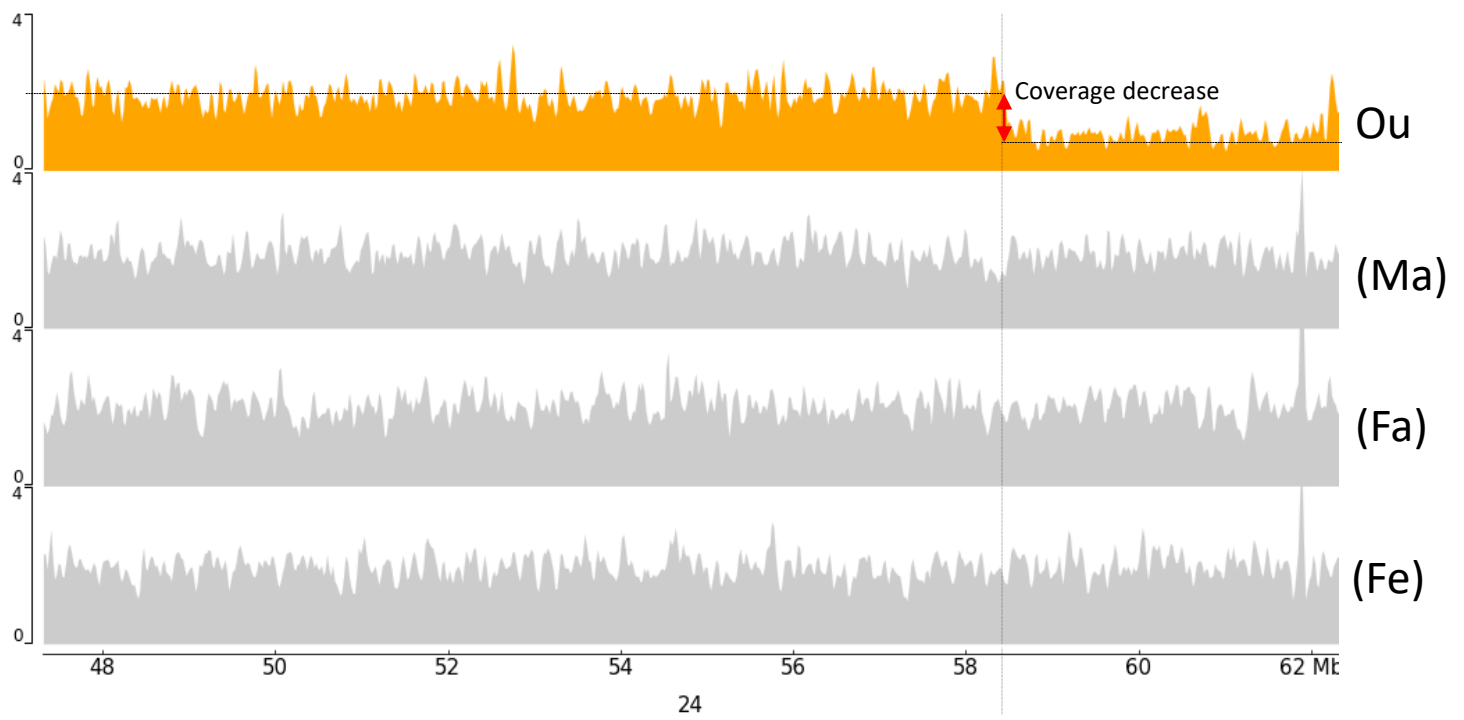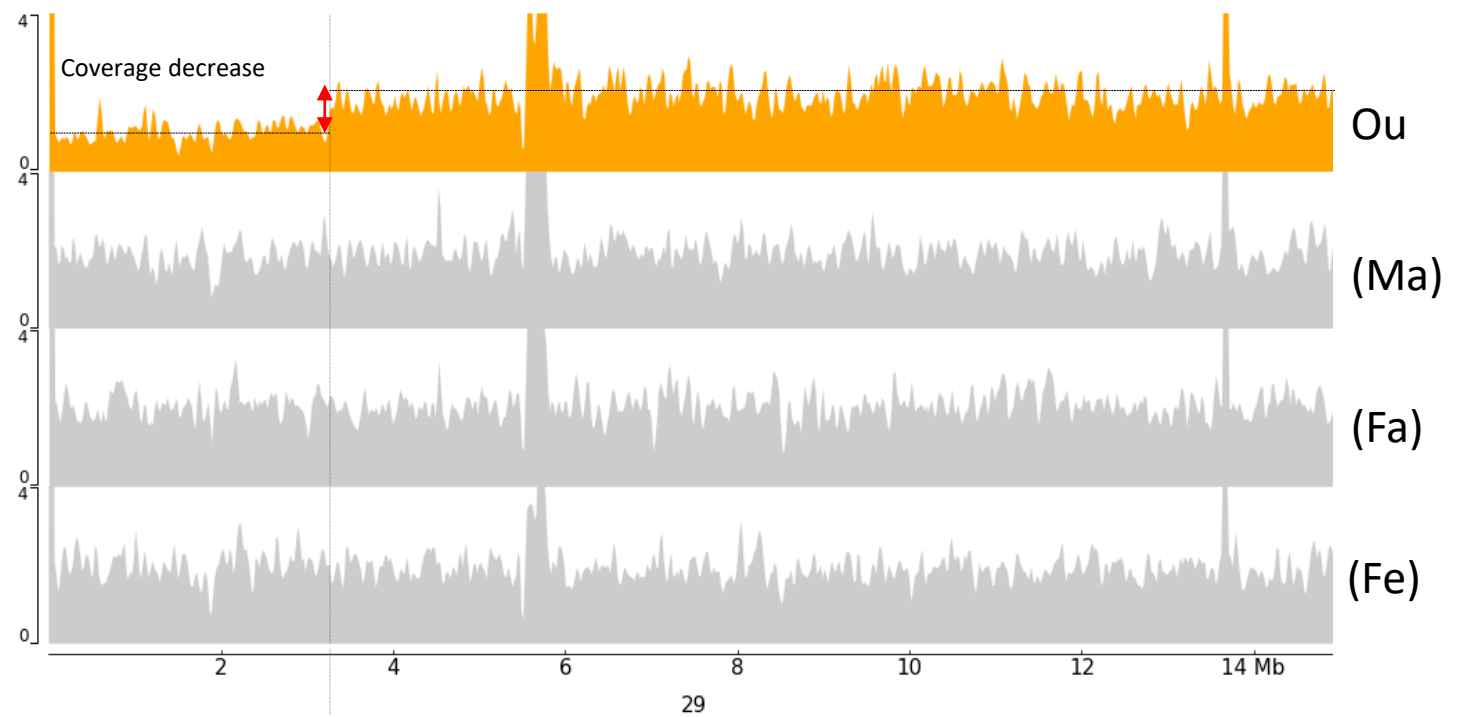

**Supplemental Figure S10 (continued).** (I) Coverage rate analysis around chimeric reads in the sequence of Ou compared to three control sequences. Note the coverage decrease after 58.4 Mb in BTA24 and before 3.3 Mb in BTA29.

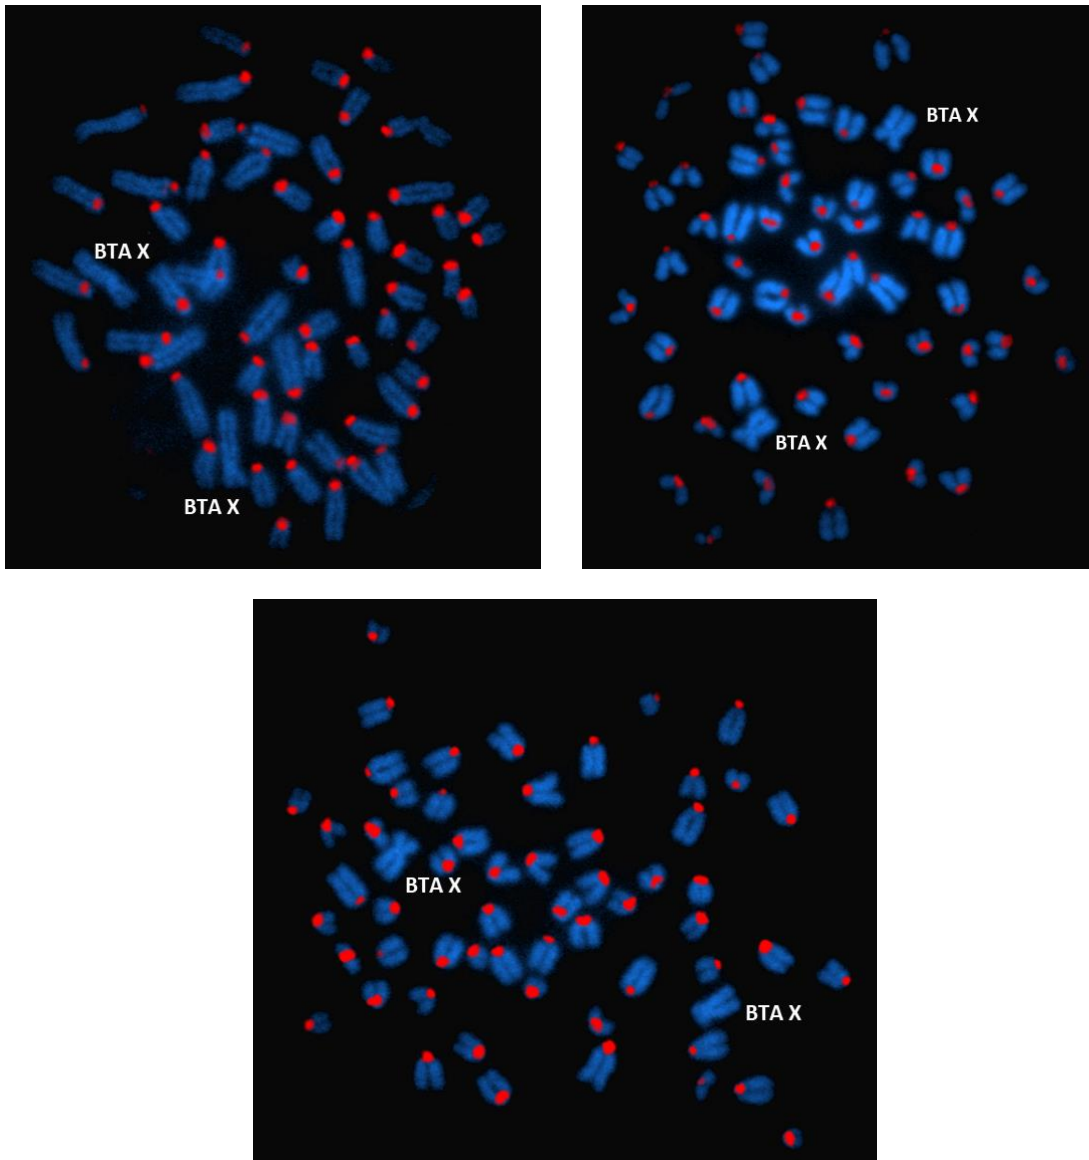

**Supplemental Figure S10 (continued).** (J) Full view of FISH (Fluorescence *In Situ* Hybridization) performed on three affected daughters of Ou. Counting of the red spots revealed the presence of only 57 autosomal centromeres, whereas 58 are expected in wild-type individuals.

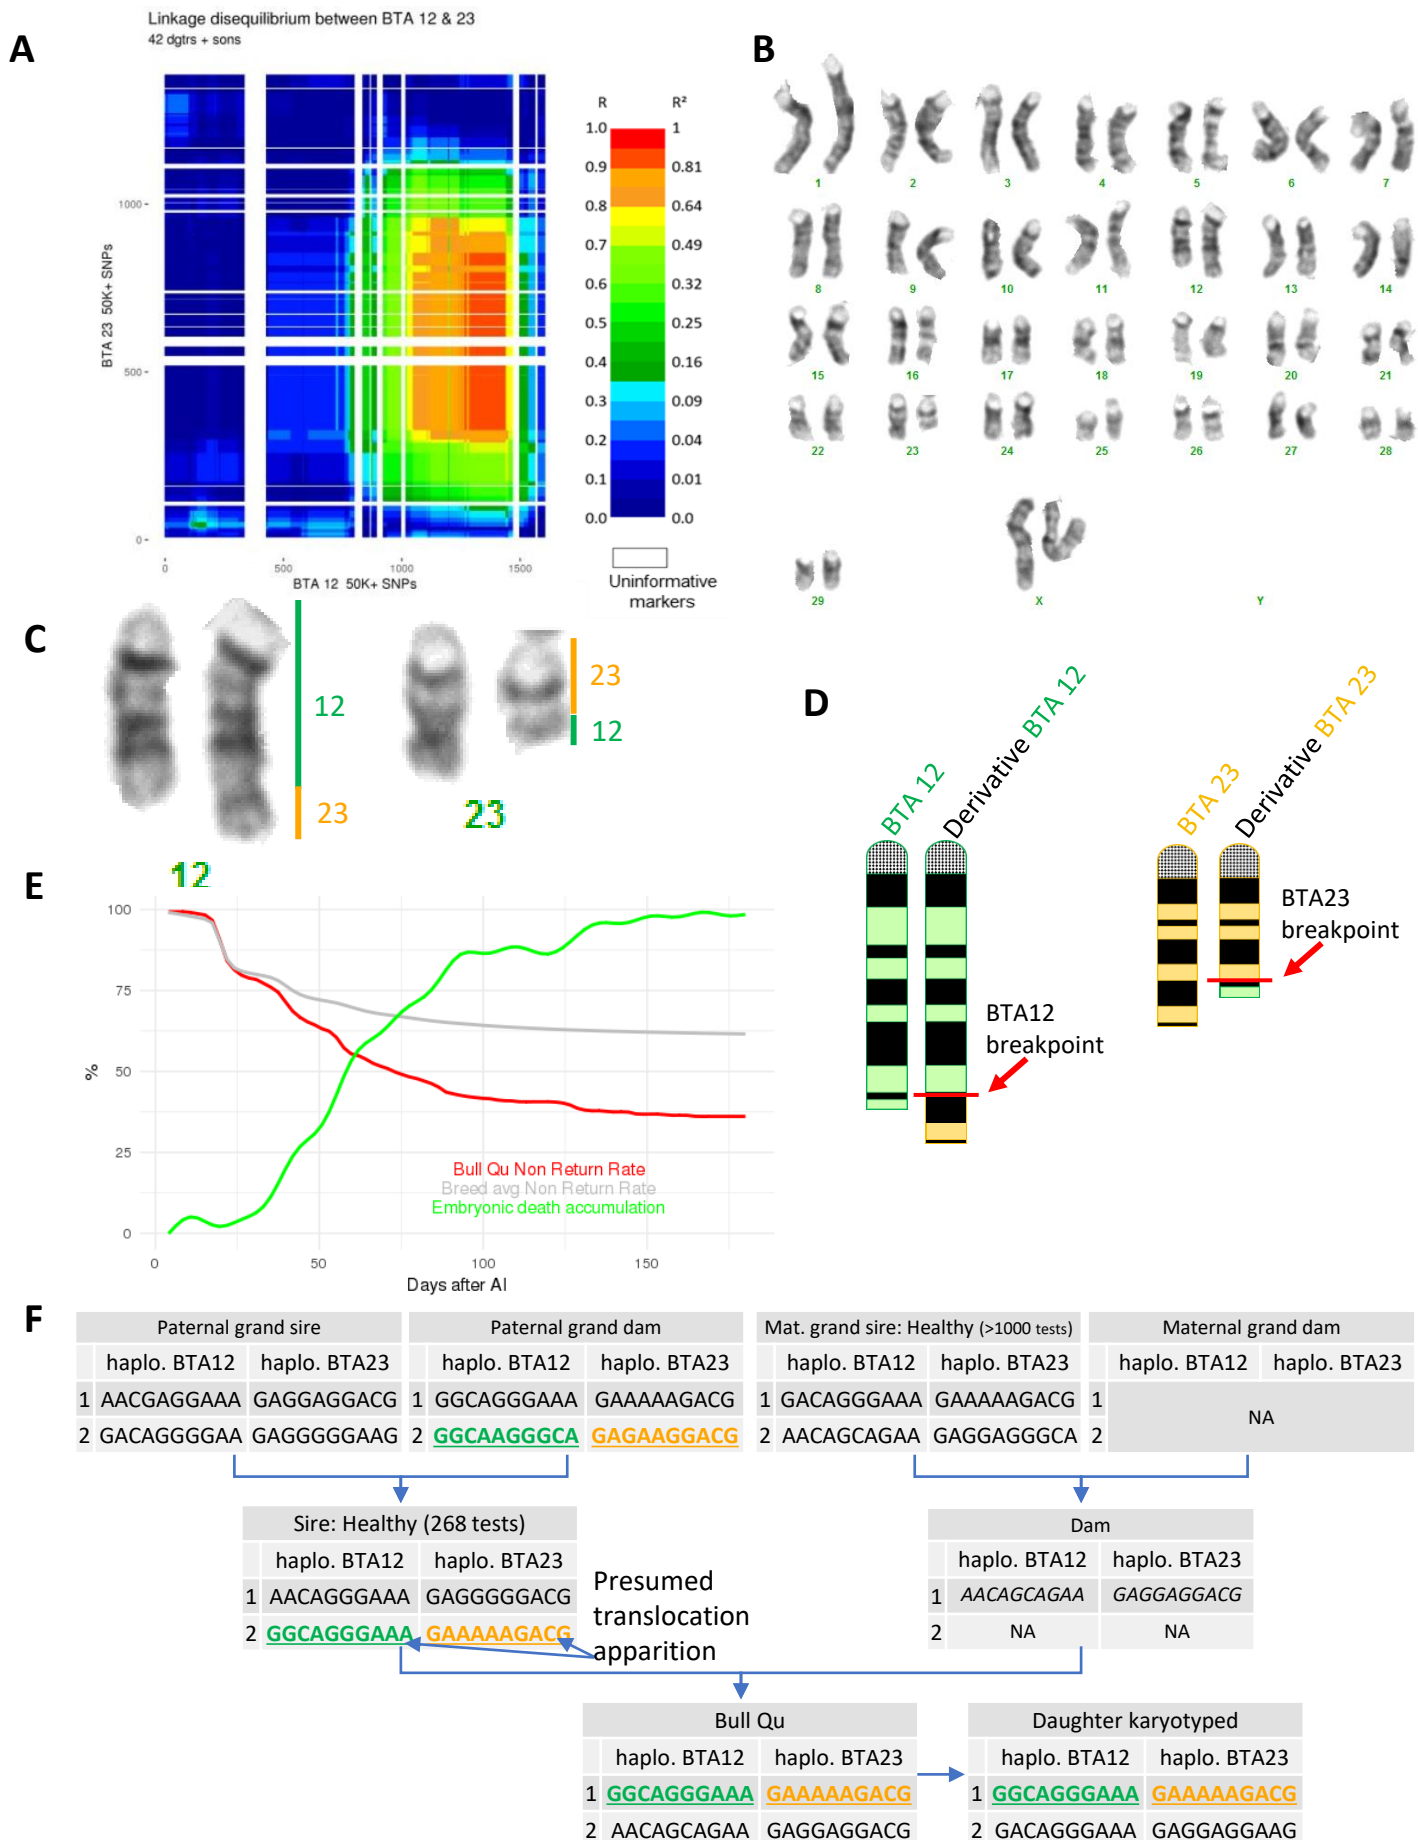

**Supplemental Figure S11. Information on t(12;23) and bull Qu.** (A) Linkage disequilibrium heat map. (B), (C) Complete GTG banding karyotype of an affected daughter of Qu and annotated close-up of the rearranged chromosomes. (D) Schematic representation of the rearranged chromosome using information from cytogenetic analyses. (E) Daily non-return rate of inseminations performed with the semen of Qu semen compared to the average non-return rate of the breed. (F) Analysis of the transmission of the segments involved in IR in the pedigree of Qu based on haplotype information. 1) and 2) refer to the paternal and maternal phases, respectively. Haplotypes involved in the rearrangement are shown in bold and underlined. They are colored to match those of the original chromosomes. Italic haplotypes are inferred from the genotypes of relatives.

Note that bull Qu inherited the two haplotypes in LD with the translocation from its sire, which showed normal LD pattern in our initial screen. We concluded that the bull Qu was the first mutant and that the rearrangement was the result of an abnormal male meiosis.

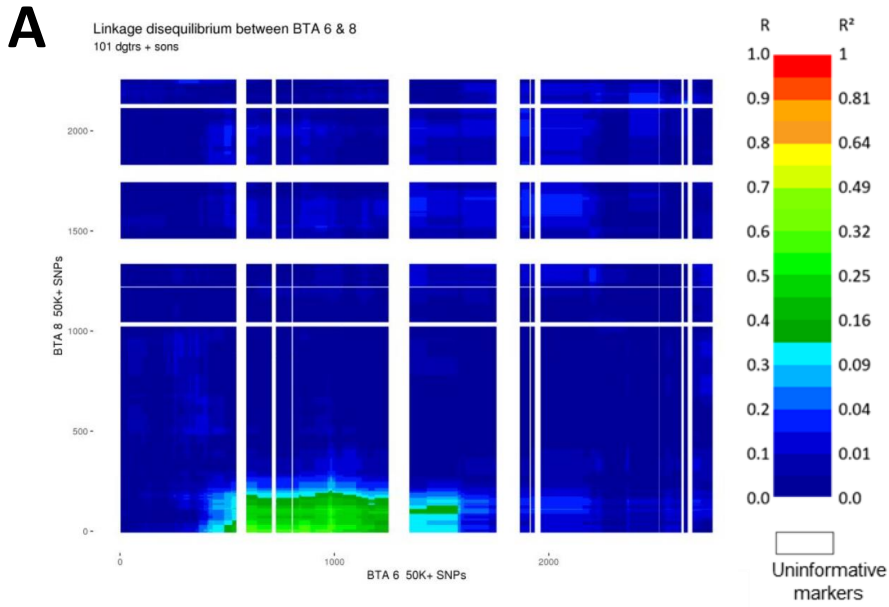

**FALSE POSITIVE**

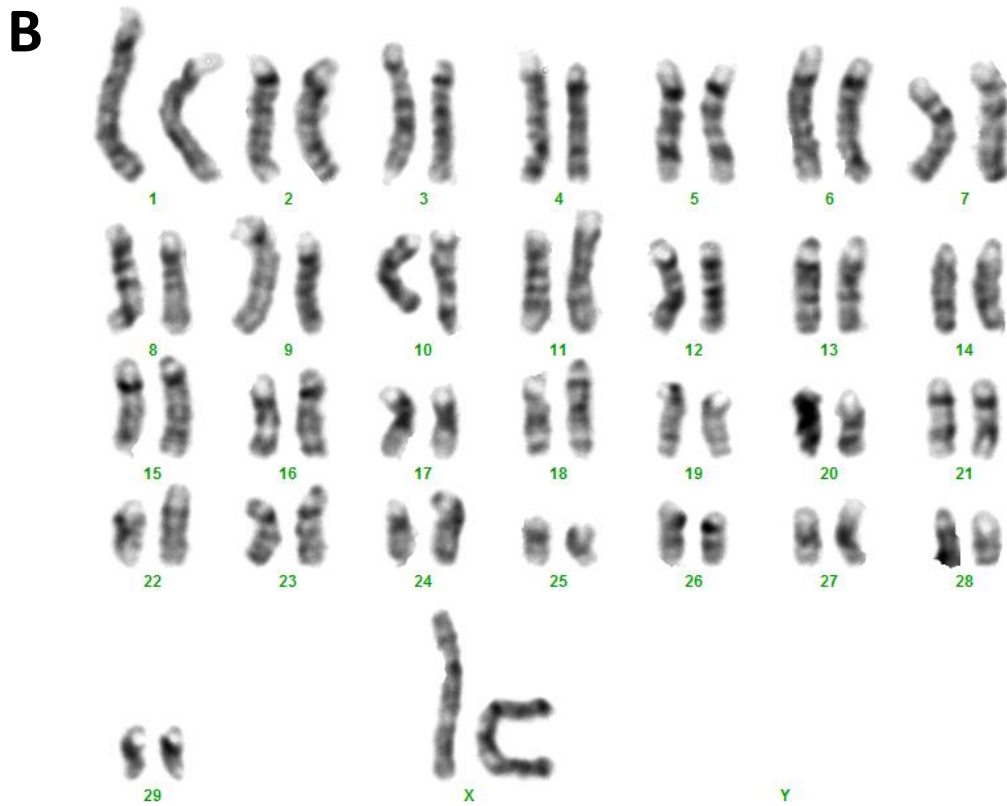

**Supplemental Figure S12. Information on bull Ra. (A)** Linkage disequilibrium heat map. **(B)** Complete GTG banding karyotype of an affected daughter of Ra.

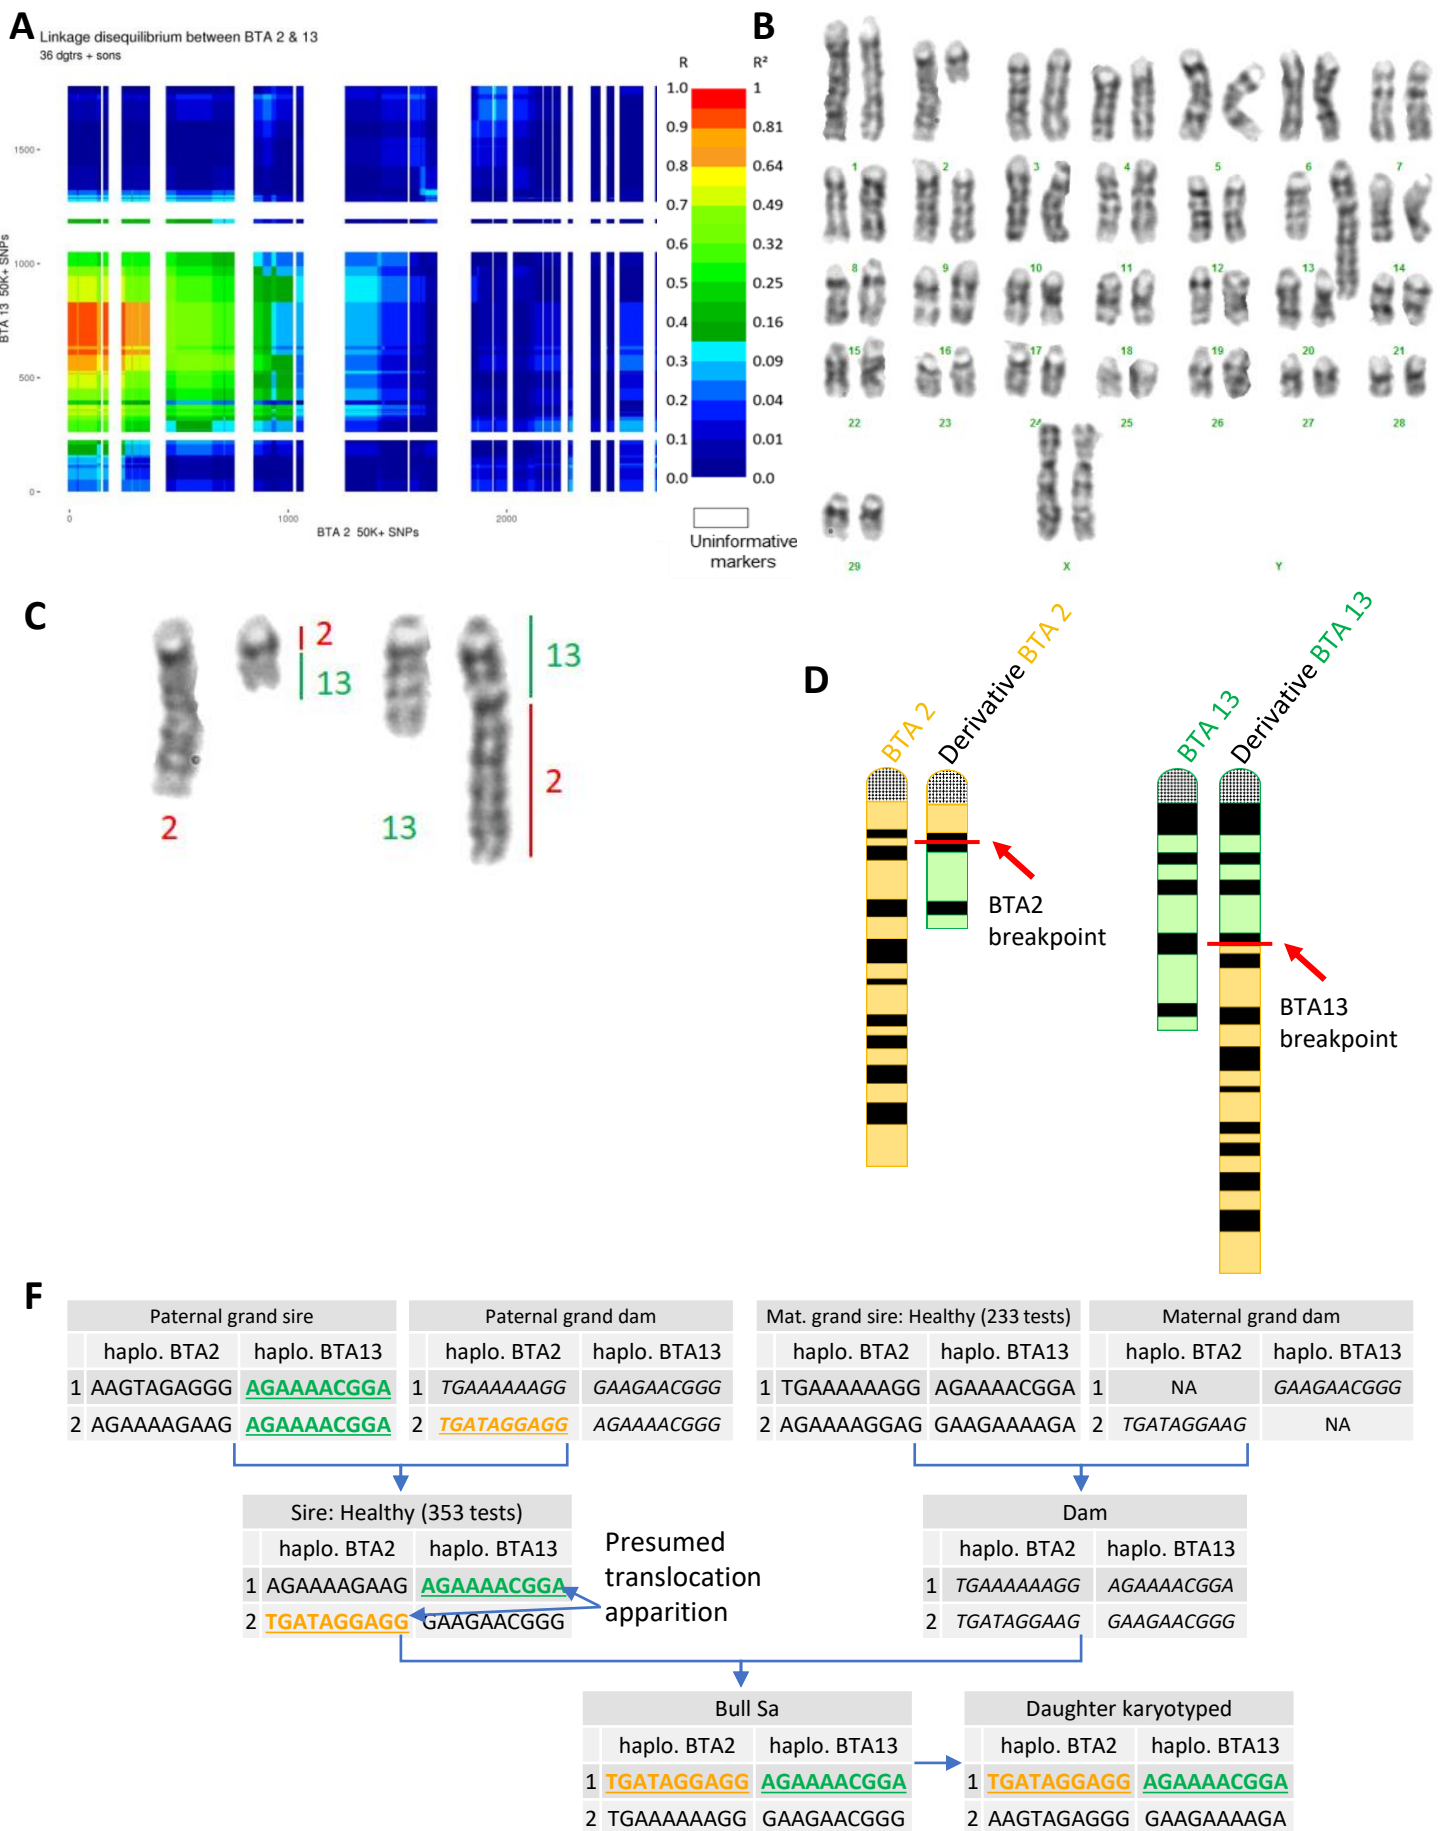

**Supplemental Figure S13. Information on t(5;28) and bull Sa.** (A) Linkage disequilibrium heat map. (B), (C) Complete GTG banding karyotype of an affected granddaughter of Sa and annotated close-up of the rearranged chromosomes. (D) Schematic representation of the rearranged chromosome using information from cytogenetic. (F) Analysis of the transmission of the segments involved in IR in the pedigree of Sa based on haplotype information. 1) and 2) refer to the paternal and maternal phases, respectively. Haplotypes involved in the rearrangement are shown in bold and underlined. They are colored to match those of the original chromosomes. Italic haplotypes are inferred from the genotypes of relatives.

Note that bull Sa inherited the two haplotypes in LD with the translocation from its sire, which showed normal LD pattern in our initial screen. We concluded that the bull Sa was the first mutant and the rearrangement was that the result of an abnormal male meiosis. Note also that panel E is missing due to insufficient number of AI to calculate the non-return rate.

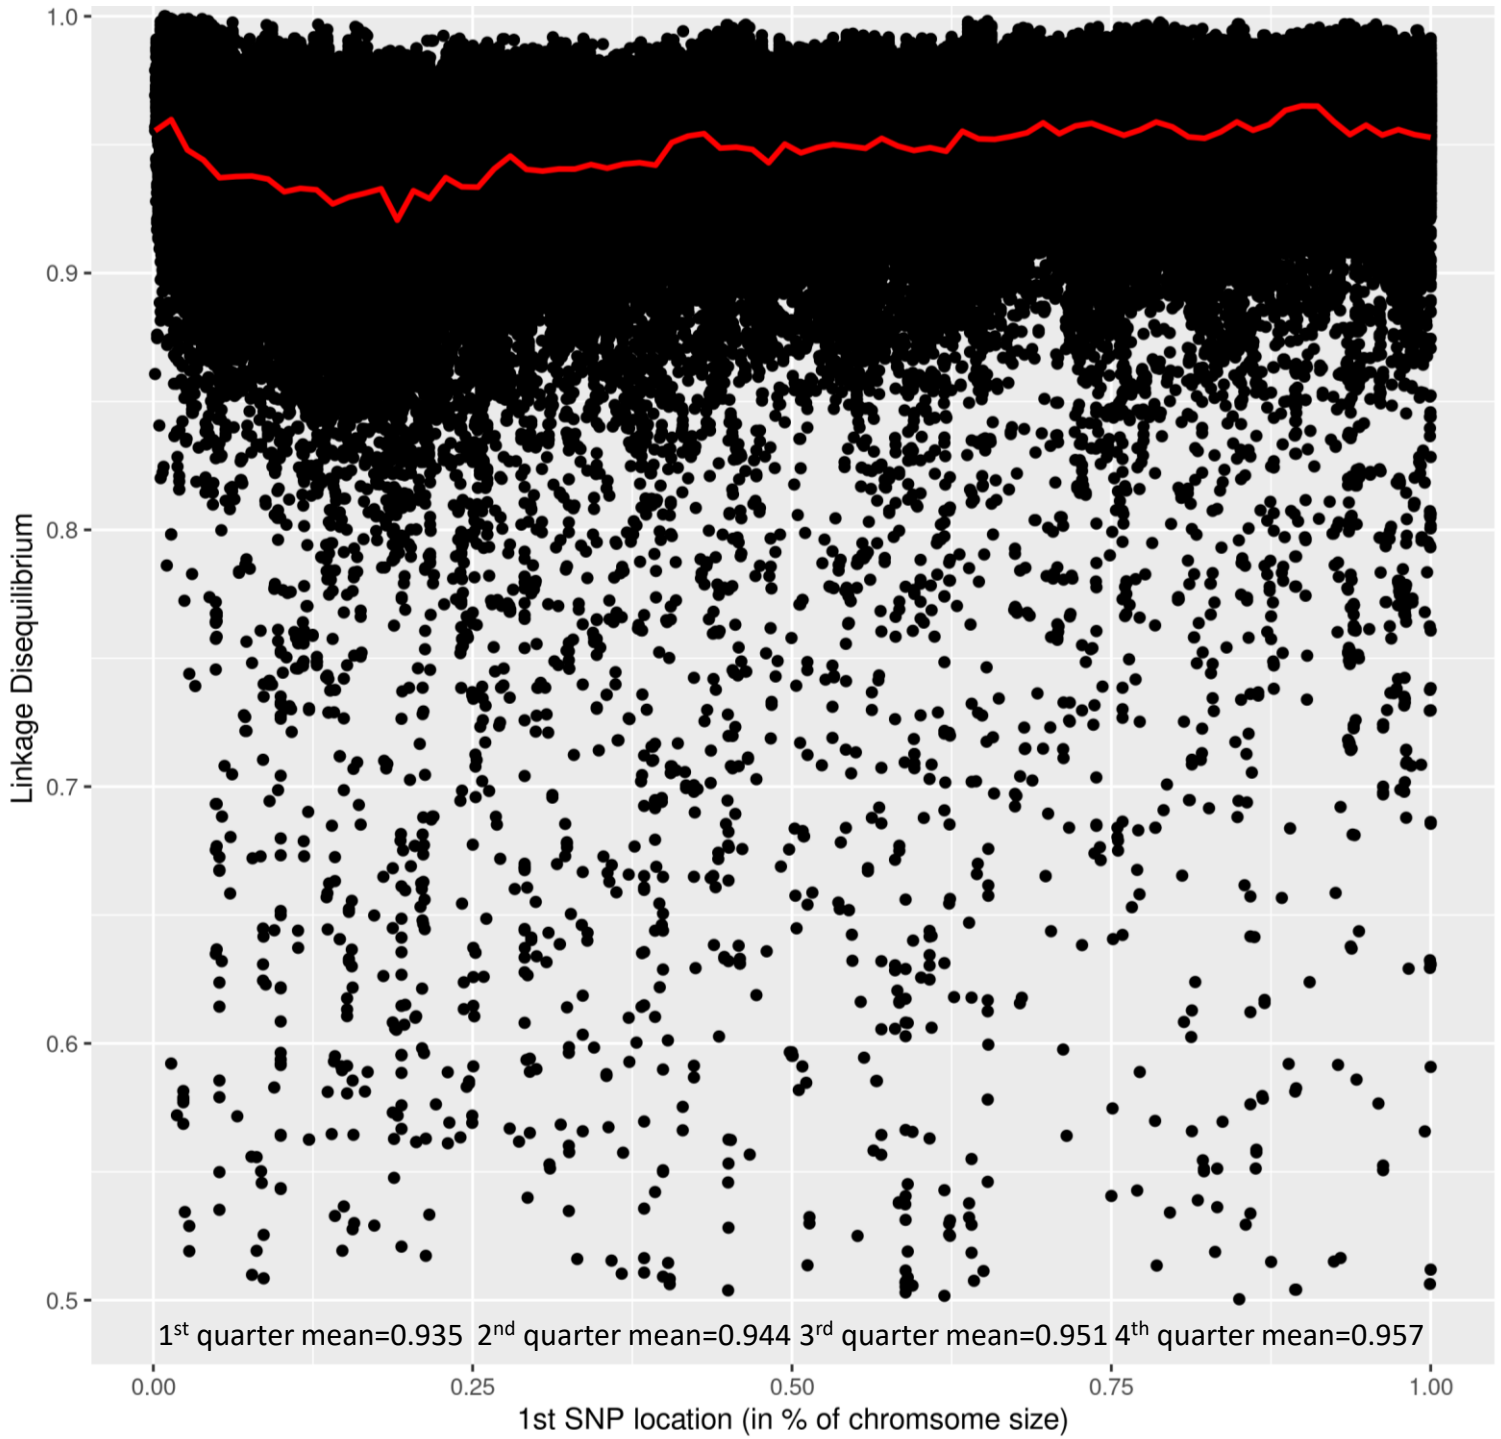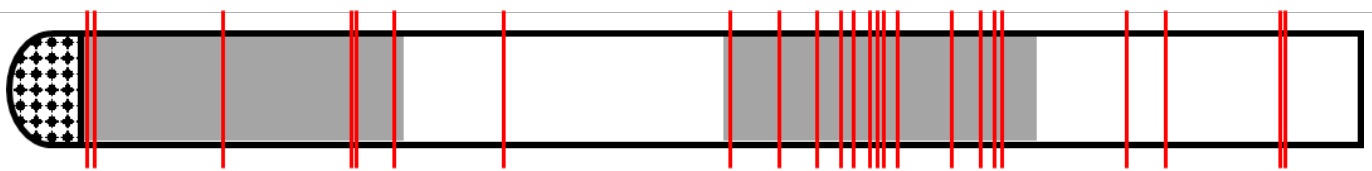

**Supplemental Figure S14. Distribution of linkage disequilibrium in chromosome.** The top graph was generated using LD calculations from the simulations performed with 100 bull progeny (same cohorts as in simulations, see 2<sup>nd</sup> paragraph in *Methods*). The LD between SNPs separated by 1.975 to 2.025 Mb was then drawn and a fitting curve traced with *ggplot2*. Note that the lowest LD level (*i.e.*, the highest level of recombination in meiosis) is reached in the first quarter of chromosomes. The third quarter, where we found more than half of the breakpoints, is a low region for meiotic recombination.
