# Supplementary material for: Large-scale detection and characterization of interchromosomal rearrangements in normozoospermic bulls using massive genotype and phenotype data sets
Source: HighWire-hosted journal article supplement (doi:10.1101/gr.277787.123), 2023-06-01
Supplement: Supplemental_Table5.xlsx [file Supplemental_Table5.xlsx]

## Sheet: Feuil1
Supplemental Table 5: List of genes possibly affected by the breakpoints.
Gene name	Gene start (bp)	Gene end (bp)	Bull	Chromosome	Breakpoint consequences
TOM1	73547847	73588700	Fa	5	Putatively deregulated (located in topologically associated domains)
HMOX1	73623293	73630548	Fa	5	Putatively deregulated (located in topologically associated domains)
MCM5	73633313	73651860	Fa	5	Putatively deregulated (located in topologically associated domains)
RASD2	73749045	73760542	Fa	5	Putatively deregulated (located in topologically associated domains)
MB	73814162	73829888	Fa	5	Putatively deregulated (located in topologically associated domains)
RBFOX2	73899444	74189188	Fa	5	Putatively deregulated (located in topologically associated domains)
APOL3	74600517	74711373	Fa	5	Putatively deregulated (located in topologically associated domains)
MYH9	74719956	74805905	Fa	5	Putatively deregulated (located in topologically associated domains)
TXN2	74883636	74893752	Fa	5	Putatively deregulated (located in topologically associated domains)
FOXRED2	74905031	74919112	Fa	5	Putatively deregulated (located in topologically associated domains)
EIF3D	74925192	74939376	Fa	5	Putatively deregulated (located in topologically associated domains)
CACNG2	74969135	75090284	Fa	5	Putatively deregulated (located in topologically associated domains)
IFT27	75135020	75158505	Fa	5	Putatively deregulated (located in topologically associated domains)
PVALB	75176504	75193657	Fa	5	Putatively deregulated (located in topologically associated domains)
NCF4	75265852	75284401	Fa	5	Putatively deregulated (located in topologically associated domains)
CSF2RB	75349088	75370432	Fa	5	Putatively deregulated (located in topologically associated domains)
TEX33	75415497	75433378	Fa	5	Putatively deregulated (located in topologically associated domains)
TST	75435115	75442678	Fa	5	Putatively deregulated (located in topologically associated domains)
MPST	75441888	75452001	Fa	5	Putatively deregulated (located in topologically associated domains)
KCTD17	75479863	75490596	Fa	5	Putatively deregulated (located in topologically associated domains)
TMPRSS6	75494237	75529894	Fa	5	Putatively deregulated (located in topologically associated domains)
IL2RB	75550213	75591439	Fa	5	Putatively deregulated (located in topologically associated domains)
C1QTNF6	75616456	75629565	Fa	5	Putatively deregulated (located in topologically associated domains)
SSTR3	75635774	75637042	Fa	5	Putatively deregulated (located in topologically associated domains)
RAC2	75656456	75673313	Fa	5	Putatively deregulated (located in topologically associated domains)
CYTH4	75703658	75734563	Fa	5	Putatively deregulated (located in topologically associated domains)
ELFN2	75796037	75798511	Fa	5	Putatively deregulated (located in topologically associated domains)
MFNG	75887878	75903492	Fa	5	Putatively deregulated (located in topologically associated domains)
CARD10	75907210	75940103	Fa	5	Putatively deregulated (located in topologically associated domains)
PGBD5	2317189	2413142	Fa	28	Putatively deregulated (located in topologically associated domains)
THSD7B	59511857	60421786	Fe	2	Putatively deregulated (located in topologically associated domains)
CXCR4	61250082	61253877	Fe	2	Putatively deregulated (located in topologically associated domains)
DARS1	61390060	61455629	Fe	2	Putatively deregulated (located in topologically associated domains)
MCM6	61489617	61524285	Fe	2	Putatively deregulated (located in topologically associated domains)
LCT	61535026	61583839	Fe	2	Putatively deregulated (located in topologically associated domains)
UBXN4	61588164	61617901	Fe	2	Putatively deregulated (located in topologically associated domains)
SPSB4	127831477	127918128	Ja	1	Putatively deregulated (located in topologically associated domains)
SLC25A36	128008638	128042419	Ja	1	Putatively deregulated (located in topologically associated domains)
TRIM42	128258678	128288461	Ja	1	Putatively deregulated (located in topologically associated domains)
CLSTN2	128385395	128561717	Ja	1	Putatively deregulated (located in topologically associated domains)
RBP1	129556881	129560370	Ja	1	Putatively deregulated (located in topologically associated domains)
RBP2	129620306	129651650	Ja	1	Putatively deregulated (located in topologically associated domains)
COPB2	129706887	129741285	Ja	1	Putatively deregulated (located in topologically associated domains)
MRPS22	129741091	129754572	Ja	1	Putatively deregulated (located in topologically associated domains)
FOXL2	130185388	130186521	Ja	1	Putatively deregulated (located in topologically associated domains)
PIK3CB	130293099	130471254	Ja	1	Putatively deregulated (located in topologically associated domains)
FAIM	130488923	130505304	Ja	1	Putatively deregulated (located in topologically associated domains)
CEP70	130531395	130598375	Ja	1	Putatively deregulated (located in topologically associated domains)
ESYT3	130610161	130664345	Ja	1	Putatively deregulated (located in topologically associated domains)
MRAS	130707102	130773432	Ja	1	Putatively deregulated (located in topologically associated domains)
NME9	130793239	130816718	Ja	1	Putatively deregulated (located in topologically associated domains)
ARMC8	130822345	130930767	Ja	1	Putatively deregulated (located in topologically associated domains)
DBR1	130942894	130955677	Ja	1	Putatively deregulated (located in topologically associated domains)
A4GNT	131003440	131008085	Ja	1	Putatively deregulated (located in topologically associated domains)
DZIP1L	131015352	131071635	Ja	1	Putatively deregulated (located in topologically associated domains)
CLDN18	131114604	131131817	Ja	1	Putatively deregulated (located in topologically associated domains)
SOX14	131371915	131372637	Ja	1	Putatively deregulated (located in topologically associated domains)
APutatively deregulated (located in topologically associated domains)2B	75091973	75213880	Ja	11	Putatively deregulated (located in topologically associated domains)
KLHL29	75240502	75572709	Ja	11	Putatively deregulated (located in topologically associated domains)
TDRD15	77798022	77808517	Ja	11	Putatively deregulated (located in topologically associated domains)
APOB	77885935	77927967	Ja	11	Putatively deregulated (located in topologically associated domains)
LDAH	78103100	78189034	Ja	11	Putatively deregulated (located in topologically associated domains)
GDF7	78204301	78208326	Ja	11	Putatively deregulated (located in topologically associated domains)
HS1BP3	78208891	78257439	Ja	11	Putatively deregulated (located in topologically associated domains)
RBFOX3	53005648	53334641	Le	19	Putatively deregulated (located in topologically associated domains)
ENGASE	53335620	53347068	Le	19	Putatively deregulated (located in topologically associated domains)
C1QTNF1	53358290	53366382	Le	19	Putatively deregulated (located in topologically associated domains)
CANT1	53391266	53406328	Le	19	Putatively deregulated (located in topologically associated domains)
LGALS3BP	53416674	53427208	Le	19	Putatively deregulated (located in topologically associated domains)
TIMP2	53460671	53514937	Le	19	Putatively deregulated (located in topologically associated domains)
USP36	53522615	53553993	Le	19	Putatively deregulated (located in topologically associated domains)
CYTH1	53565765	53643768	Le	19	Putatively deregulated (located in topologically associated domains)
DNAH17	53691404	53787907	Le	19	Putatively deregulated (located in topologically associated domains)
PGS1	53787203	53824616	Le	19	Putatively deregulated (located in topologically associated domains)
SOCS3	53840159	53840858	Le	19	Putatively deregulated (located in topologically associated domains)
THA1	53918897	53924904	Le	19	Putatively deregulated (located in topologically associated domains)
TMEM235	53928092	53933612	Le	19	Putatively deregulated (located in topologically associated domains)
BIRC5	53940667	53947960	Le	19	Putatively deregulated (located in topologically associated domains)
AFMID	53954985	53977477	Le	19	Putatively deregulated (located in topologically associated domains)
TK1	53977498	53991174	Le	19	Putatively deregulated (located in topologically associated domains)
SYNGR2	53992203	53995976	Le	19	Putatively deregulated (located in topologically associated domains)
TMC8	54013443	54024053	Le	19	Putatively deregulated (located in topologically associated domains)
TMC6	54025900	54048017	Le	19	Putatively deregulated (located in topologically associated domains)
TNRC6C	54051772	54124386	Le	19	Putatively deregulated (located in topologically associated domains)
SEPTIN9	54497005	54676832	Le	19	Putatively deregulated (located in topologically associated domains)
SEC14L1	54705353	54755623	Le	19	Putatively deregulated (located in topologically associated domains)
MGAT5B	54906180	54972843	Le	19	Putatively deregulated (located in topologically associated domains)
MFSD11	55014709	55043048	Le	19	Putatively deregulated (located in topologically associated domains)
SRSF2	55043351	55047192	Le	19	Putatively deregulated (located in topologically associated domains)
METTL23	55046996	55052712	Le	19	Putatively deregulated (located in topologically associated domains)
JMJD6	55052720	55060447	Le	19	Putatively deregulated (located in topologically associated domains)
ST6GALNAC1	55121131	55140468	Le	19	Putatively deregulated (located in topologically associated domains)
ST6GALNAC2	55174502	55193764	Le	19	Putatively deregulated (located in topologically associated domains)
CYGB	55217714	55227282	Le	19	Putatively deregulated (located in topologically associated domains)
RHBDF2	55249957	55274837	Le	19	Putatively deregulated (located in topologically associated domains)
AANAT	55288432	55290366	Le	19	Putatively deregulated (located in topologically associated domains)
UBE2O	55299835	55349164	Le	19	Putatively deregulated (located in topologically associated domains)
SPHK1	55350377	55354150	Le	19	Putatively deregulated (located in topologically associated domains)
PRPSAP1	55387190	55413082	Le	19	Putatively deregulated (located in topologically associated domains)
QRICH2	55416033	55440784	Le	19	Putatively deregulated (located in topologically associated domains)
UBALD2	55443082	55449253	Le	19	Putatively deregulated (located in topologically associated domains)
RNF157	55464958	55539900	Le	19	Putatively deregulated (located in topologically associated domains)
FOXJ1	55541080	55545858	Le	19	Putatively deregulated (located in topologically associated domains)
EXOC7	55560758	55581189	Le	19	Putatively deregulated (located in topologically associated domains)
ZACN	55578491	55582703	Le	19	Putatively deregulated (located in topologically associated domains)
GALR2	55583910	55586715	Le	19	Putatively deregulated (located in topologically associated domains)
SRP68	55592401	55617440	Le	19	Putatively deregulated (located in topologically associated domains)
EVPL	55626318	55644114	Le	19	Putatively deregulated (located in topologically associated domains)
CDK3	55644953	55657739	Le	19	Putatively deregulated (located in topologically associated domains)
TEN1	55649348	55661354	Le	19	Putatively deregulated (located in topologically associated domains)
ACOX1	55669917	55690559	Le	19	Putatively deregulated (located in topologically associated domains)
FBF1	55694918	55716391	Le	19	Putatively deregulated (located in topologically associated domains)
MRPL38	55721539	55726175	Le	19	Putatively deregulated (located in topologically associated domains)
TRIM65	55727639	55732562	Le	19	Putatively deregulated (located in topologically associated domains)
TRIM47	55741272	55745803	Le	19	Putatively deregulated (located in topologically associated domains)
WBP2	55760647	55769045	Le	19	Putatively deregulated (located in topologically associated domains)
UNC13D	55770279	55785637	Le	19	Putatively deregulated (located in topologically associated domains)
UNK	55785615	55817832	Le	19	Putatively deregulated (located in topologically associated domains)
H3-3B	55821418	55823783	Le	19	Putatively deregulated (located in topologically associated domains)
GALK1	55833248	55840035	Le	19	Putatively deregulated (located in topologically associated domains)
ITGB4	55840138	55872606	Le	19	Putatively deregulated (located in topologically associated domains)
SAP30BP	55881837	55915877	Le	19	Putatively deregulated (located in topologically associated domains)
RECQL5	55916749	55945997	Le	19	Putatively deregulated (located in topologically associated domains)
SMIM6	55926566	55927989	Le	19	Putatively deregulated (located in topologically associated domains)
SMIM5	55932583	55939531	Le	19	Putatively deregulated (located in topologically associated domains)
LLGL2	55984816	56020314	Le	19	Putatively deregulated (located in topologically associated domains)
TSEN54	56020690	56027838	Le	19	Putatively deregulated (located in topologically associated domains)
CASKIN2	56028993	56043211	Le	19	Putatively deregulated (located in topologically associated domains)
TMEM94	56044033	56058416	Le	19	Putatively deregulated (located in topologically associated domains)
GRB2	56117146	56181857	Le	19	Putatively deregulated (located in topologically associated domains)
SLC25A19	56205866	56217750	Le	19	Putatively deregulated (located in topologically associated domains)
MIF4GD	56219006	56223201	Le	19	Putatively deregulated (located in topologically associated domains)
MRPS7	56222482	56226605	Le	19	Putatively deregulated (located in topologically associated domains)
GGA3	56226171	56240464	Le	19	Putatively deregulated (located in topologically associated domains)
NUP85	56241099	56269017	Le	19	Putatively deregulated (located in topologically associated domains)
SUMO2	56285455	56294354	Le	19	Putatively deregulated (located in topologically associated domains)
JPT1	56301937	56318233	Le	19	Putatively deregulated (located in topologically associated domains)
NT5C	56318393	56320652	Le	19	Putatively deregulated (located in topologically associated domains)
ARMC7	56320659	56335696	Le	19	Putatively deregulated (located in topologically associated domains)
SLC16A5	56339626	56360049	Le	19	Putatively deregulated (located in topologically associated domains)
KCTD2	56387312	56398710	Le	19	Putatively deregulated (located in topologically associated domains)
ATP5PD	56398798	56404689	Le	19	Putatively deregulated (located in topologically associated domains)
MRPL58	56419751	56426828	Le	19	Putatively deregulated (located in topologically associated domains)
CDR2L	56432269	56444629	Le	19	Putatively deregulated (located in topologically associated domains)
HID1	56455015	56475733	Le	19	Disrupted
OTOP3	56476437	56483642	Le	19	Putatively deregulated (located in topologically associated domains)
OTOP2	56490534	56499714	Le	19	Putatively deregulated (located in topologically associated domains)
USH1G	56501076	56504816	Le	19	Putatively deregulated (located in topologically associated domains)
FADS6	56520577	56536561	Le	19	Putatively deregulated (located in topologically associated domains)
FDXR	56542648	56554189	Le	19	Putatively deregulated (located in topologically associated domains)
GRIN2C	56555365	56571477	Le	19	Putatively deregulated (located in topologically associated domains)
TMEM104	56577202	56647063	Le	19	Putatively deregulated (located in topologically associated domains)
NAT9	56648056	56652832	Le	19	Putatively deregulated (located in topologically associated domains)
SLC9A3R1	56653907	56671068	Le	19	Putatively deregulated (located in topologically associated domains)
RAB37	56672776	56740010	Le	19	Putatively deregulated (located in topologically associated domains)
CD300E	56769589	56781204	Le	19	Putatively deregulated (located in topologically associated domains)
CD300H	56866880	56875156	Le	19	Putatively deregulated (located in topologically associated domains)
CD300LB	56900173	56913469	Le	19	Putatively deregulated (located in topologically associated domains)
CD300A	56935114	56953144	Le	19	Putatively deregulated (located in topologically associated domains)
GPRC5C	56971845	57152217	Le	19	Putatively deregulated (located in topologically associated domains)
GPR142	57036059	57041099	Le	19	Putatively deregulated (located in topologically associated domains)
BTBD17	57046406	57074416	Le	19	Putatively deregulated (located in topologically associated domains)
KIF19	57052694	57110943	Le	19	Putatively deregulated (located in topologically associated domains)
DNAI2	57115962	57146541	Le	19	Putatively deregulated (located in topologically associated domains)
TTYH2	57151008	57186696	Le	19	Putatively deregulated (located in topologically associated domains)
RPL38	57192444	57196471	Le	19	Putatively deregulated (located in topologically associated domains)
BAK1	7712944	7719279	Le	23	Putatively deregulated (located in topologically associated domains)
GGNBP1	7720354	7725488	Le	23	Putatively deregulated (located in topologically associated domains)
ITPR3	7745549	7813182	Le	23	Putatively deregulated (located in topologically associated domains)
UQCC2	7814525	7840379	Le	23	Putatively deregulated (located in topologically associated domains)
IP6K3	7852686	7877221	Le	23	Putatively deregulated (located in topologically associated domains)
LEMD2	7898387	7914749	Le	23	Putatively deregulated (located in topologically associated domains)
MLN	7921502	7928988	Le	23	Putatively deregulated (located in topologically associated domains)
GRM4	8140143	8255826	Le	23	Putatively deregulated (located in topologically associated domains)
HMGA1	8313843	8322713	Le	23	Putatively deregulated (located in topologically associated domains)
SMIM29	8322845	8325565	Le	23	Putatively deregulated (located in topologically associated domains)
NUDT3	8351570	8468528	Le	23	Putatively deregulated (located in topologically associated domains)
RPS10	8488475	8495421	Le	23	Putatively deregulated (located in topologically associated domains)
PACSIN1	8520787	8588638	Le	23	Putatively deregulated (located in topologically associated domains)
SPDEF	8591537	8608865	Le	23	Putatively deregulated (located in topologically associated domains)
ILRUN	8638856	8743421	Le	23	Putatively deregulated (located in topologically associated domains)
SNRPC	8784910	8795622	Le	23	Putatively deregulated (located in topologically associated domains)
UHRF1BP1	8810255	8882363	Le	23	Putatively deregulated (located in topologically associated domains)
TAF11	8887254	8894899	Le	23	Putatively deregulated (located in topologically associated domains)
ANKS1A	8896219	9063638	Le	23	Putatively deregulated (located in topologically associated domains)
TCP11	9078654	9110714	Le	23	Putatively deregulated (located in topologically associated domains)
SCUBE3	9192525	9224847	Le	23	Putatively deregulated (located in topologically associated domains)
ZNF76	9254929	9267702	Le	23	Putatively deregulated (located in topologically associated domains)
DEF6	9270961	9298630	Le	23	Putatively deregulated (located in topologically associated domains)
PPARD	9304237	9389925	Le	23	Putatively deregulated (located in topologically associated domains)
FANCE	9415902	9425051	Le	23	Putatively deregulated (located in topologically associated domains)
RPL10A	9425849	9428501	Le	23	Putatively deregulated (located in topologically associated domains)
TEAD3	9433659	9454855	Le	23	Putatively deregulated (located in topologically associated domains)
TULP1	9457480	9471815	Le	23	Putatively deregulated (located in topologically associated domains)
FKBP5	9555619	9672159	Le	23	Putatively deregulated (located in topologically associated domains)
ARMC12	9716949	9728648	Le	23	Putatively deregulated (located in topologically associated domains)
CLPSL2	9746303	9748669	Le	23	Putatively deregulated (located in topologically associated domains)
CLPS	9757684	9760669	Le	23	Putatively deregulated (located in topologically associated domains)
LHFPL5	9767607	9783035	Le	23	Putatively deregulated (located in topologically associated domains)
SRPK1	9787871	9824986	Le	23	Putatively deregulated (located in topologically associated domains)
SLC26A8	9878961	9967961	Le	23	Putatively deregulated (located in topologically associated domains)
MAPK14	9969009	10044336	Le	23	Putatively deregulated (located in topologically associated domains)
MAPK13	10058481	10067089	Le	23	Putatively deregulated (located in topologically associated domains)
BRPF3	10118401	10154265	Le	23	Putatively deregulated (located in topologically associated domains)
PNPLA1	10187681	10245704	Le	23	Putatively deregulated (located in topologically associated domains)
BNIP5	10250135	10269825	Le	23	Putatively deregulated (located in topologically associated domains)
PXT1	10341272	10360192	Le	23	Putatively deregulated (located in topologically associated domains)
KCTD20	10377039	10413105	Le	23	Putatively deregulated (located in topologically associated domains)
STK38	10417325	10458886	Le	23	Putatively deregulated (located in topologically associated domains)
SRSF3	10502815	10509269	Le	23	Putatively deregulated (located in topologically associated domains)
RPS4Y1	10550062	10565808	Le	23	Putatively deregulated (located in topologically associated domains)
CDKN1A	10582308	10590589	Le	23	Putatively deregulated (located in topologically associated domains)
RAB44	10616635	10643542	Le	23	Putatively deregulated (located in topologically associated domains)
CPNE5	10653672	10757196	Le	23	Putatively deregulated (located in topologically associated domains)
PPIL1	10771195	10791508	Le	23	Putatively deregulated (located in topologically associated domains)
PI16	10860919	10873149	Le	23	Putatively deregulated (located in topologically associated domains)
MTCH1	10878590	10898204	Le	23	Putatively deregulated (located in topologically associated domains)
FGD2	10916507	10942796	Le	23	Putatively deregulated (located in topologically associated domains)
PIM1	11066555	11071948	Le	23	Putatively deregulated (located in topologically associated domains)
TMEM217	11125128	11148488	Le	23	Putatively deregulated (located in topologically associated domains)
TBC1D22B	11148615	11223026	Le	23	Putatively deregulated (located in topologically associated domains)
PIGK	67430365	67568076	Ma	3	Putatively deregulated (located in topologically associated domains)
ST6GALNAC5	67605888	67814273	Ma	3	Putatively deregulated (located in topologically associated domains)
ASB17	68936675	68954422	Ma	3	Putatively deregulated (located in topologically associated domains)
MSH4	68962719	69055498	Ma	3	Putatively deregulated (located in topologically associated domains)
RABGGTB	69057556	69065985	Ma	3	Putatively deregulated (located in topologically associated domains)
ACADM	69086075	69124464	Ma	3	Putatively deregulated (located in topologically associated domains)
SLC44A5	69467291	69583186	Ma	3	Putatively deregulated (located in topologically associated domains)
LHX8	69636164	69662240	Ma	3	Deleted
TYW3	69968102	69990582	Ma	3	Deleted
CRYZ	69989882	70019359	Ma	3	Deleted
TNNI3K	70212113	70556639	Ma	3	Deleted
FPGT	70600177	70608293	Ma	3	Deleted
LRRIQ3	70608442	70718331	Ma	3	Deleted
NEGR1	72812247	73845504	Ma	3	Putatively deregulated (located in topologically associated domains)
ZRANB2	74146776	74163809	Ma	3	Putatively deregulated (located in topologically associated domains)
PTGER3	74185666	74228359	Ma	3	Putatively deregulated (located in topologically associated domains)
CTH	74766636	74793722	Ma	3	Putatively deregulated (located in topologically associated domains)
ANKRD13C	74830012	74922861	Ma	3	Putatively deregulated (located in topologically associated domains)
SRSF11	74928249	74964017	Ma	3	Putatively deregulated (located in topologically associated domains)
LRRC40	74977580	75017652	Ma	3	Putatively deregulated (located in topologically associated domains)
LRRC7	75039363	75644478	Ma	3	Putatively deregulated (located in topologically associated domains)
DEPDC1	76768174	76788676	Ma	3	Putatively deregulated (located in topologically associated domains)
IF1DA6	23322793	23323353	Ma	8	Putatively deregulated (located in topologically associated domains)
HACD4	23375118	23404576	Ma	8	Putatively deregulated (located in topologically associated domains)
FOCAD	23422760	23725195	Ma	8	Disrupted
MLLT3	23784601	24069145	Ma	8	Putatively deregulated (located in topologically associated domains)
SLC24A2	24532716	24812024	Ma	8	Putatively deregulated (located in topologically associated domains)
ACER2	24864803	24891849	Ma	8	Putatively deregulated (located in topologically associated domains)
MINDY4	65467521	65585947	Nt	4	Putatively deregulated (located in topologically associated domains)
INMT	65603906	65608037	Nt	4	Putatively deregulated (located in topologically associated domains)
CRHR2	65647996	65705053	Nt	4	Putatively deregulated (located in topologically associated domains) & Deleted in partially monosomic
GARS1	65704797	65758270	Nt	4	Putatively deregulated (located in topologically associated domains) & Deleted in partially monosomic
GGCT	65806682	65816128	Nt	4	Putatively deregulated (located in topologically associated domains) & Deleted in partially monosomic
NOD1	65822126	65911847	Nt	4	Putatively deregulated (located in topologically associated domains) & Deleted in partially monosomic
ZNRF2	65961977	66053326	Nt	4	Putatively deregulated (located in topologically associated domains) & Deleted in partially monosomic
MTURN	66186175	66214450	Nt	4	Putatively deregulated (located in topologically associated domains) & Deleted in partially monosomic
PLEKHA8	66266959	66328519	Nt	4	Putatively deregulated (located in topologically associated domains) & Deleted in partially monosomic
FKBP14	66328677	66340716	Nt	4	Putatively deregulated (located in topologically associated domains) & Deleted in partially monosomic
SCRN1	66355254	66421169	Nt	4	Putatively deregulated (located in topologically associated domains) & Deleted in partially monosomic
WIPF3	66423128	66443623	Nt	4	Putatively deregulated (located in topologically associated domains) & Deleted in partially monosomic
PRR15	66608858	66610438	Nt	4	Putatively deregulated (located in topologically associated domains) & Deleted in partially monosomic
CHN2	66634935	66970909	Nt	4	Putatively deregulated (located in topologically associated domains) & Deleted in partially monosomic
CPVL	67029848	67157458	Nt	4	Putatively deregulated (located in topologically associated domains) & Deleted in partially monosomic
TRIL	67204660	67207092	Nt	4	Putatively deregulated (located in topologically associated domains) & Deleted in partially monosomic
CREB5	67314290	67752296	Nt	4	Deleted in partial monosomic
JAZF1	67992971	68321145	Nt	4	Deleted in partial monosomic
TAX1BP1	68323940	68407181	Nt	4	Deleted in partial monosomic
HIBADH	68473794	68614954	Nt	4	Deleted in partial monosomic
EVX1	68797645	68801018	Nt	4	Deleted in partial monosomic
HOXA13	68842500	68844385	Nt	4	Deleted in partial monosomic
HOXA11	68857431	68861055	Nt	4	Deleted in partial monosomic
HOXA10	68862439	68872086	Nt	4	Deleted in partial monosomic
HOXA9	68877182	68880322	Nt	4	Deleted in partial monosomic
HOXA7	68885186	68887923	Nt	4	Deleted in partial monosomic
HOXA6	68894951	68898550	Nt	4	Deleted in partial monosomic
HOXA5	68898726	68901681	Nt	4	Deleted in partial monosomic
HOXA3	68902556	68934981	Nt	4	Deleted in partial monosomic
HOXA4	68911991	68914205	Nt	4	Deleted in partial monosomic
HOXA2	68939317	68941279	Nt	4	Deleted in partial monosomic
HOXA1	68945977	68948264	Nt	4	Deleted in partial monosomic
SKAP2	69125496	69297030	Nt	4	Deleted in partial monosomic
SNX10	69587812	69655430	Nt	4	Deleted in partial monosomic
CBX3	69722997	69734069	Nt	4	Deleted in partial monosomic
HNRNPA2B1	69735135	69744610	Nt	4	Deleted in partial monosomic
NFE2L3	69748359	69782790	Nt	4	Deleted in partial monosomic
NPVF	70667240	70670595	Nt	4	Deleted in partial monosomic
CYCS	70735436	70738238	Nt	4	Deleted in partial monosomic
OSBPL3	70844945	71041101	Nt	4	Deleted in partial monosomic
GSDME	71088326	71192446	Nt	4	Deleted in partial monosomic
PALS2	71173805	71303589	Nt	4	Deleted in partial monosomic
NPY	71616842	71623983	Nt	4	Deleted in partial monosomic
STK31	71959160	72031056	Nt	4	Deleted in partial monosomic
FAM221A	72036169	72059949	Nt	4	Deleted in partial monosomic
ADAM22	72076430	72308387	Nt	4	Deleted in partial monosomic
SRI	72319442	72342353	Nt	4	Deleted in partial monosomic
STEAP4	72378038	72407341	Nt	4	Deleted in partial monosomic
TEX47	72900781	72902435	Nt	4	Deleted in partial monosomic
ZNF804B	73324012	73427125	Nt	4	Deleted in partial monosomic
STEAP1	74355342	74368429	Nt	4	Deleted in partial monosomic
STEAP2	74405139	74430946	Nt	4	Deleted in partial monosomic
CFAP69	74443217	74502981	Nt	4	Deleted in partial monosomic
FAM237B	74512360	74512770	Nt	4	Deleted in partial monosomic
GTPBP10	74533033	74559891	Nt	4	Deleted in partial monosomic
HUS1	74573944	74587244	Nt	4	Deleted in partial monosomic
TNS3	74779686	74996283	Nt	4	Deleted in partial monosomic
IGFBP3	76116349	76124835	Nt	4	Deleted in partial monosomic
IGFBP1	76131287	76136846	Nt	4	Deleted in partial monosomic
ADCY1	76174089	76273756	Nt	4	Deleted in partial monosomic
RAMP3	76444976	76493685	Nt	4	Deleted in partial monosomic
TBRG4	76522744	76531904	Nt	4	Putatively deregulated (located in topologically associated domains) & Deleted in partially monosomic
CCM2	76550183	76603468	Nt	4	Disrupted
MYO1G	76617184	76633185	Nt	4	Putatively deregulated (located in topologically associated domains)
PURB	76665960	76669082	Nt	4	Putatively deregulated (located in topologically associated domains)
H2AZ2	76689344	76701169	Nt	4	Putatively deregulated (located in topologically associated domains)
PPIA	76709520	76713230	Nt	4	Putatively deregulated (located in topologically associated domains)
ZMIZ2	76730454	76748161	Nt	4	Putatively deregulated (located in topologically associated domains)
OGDH	76758582	76844759	Nt	4	Putatively deregulated (located in topologically associated domains)
TMED4	76859613	76862453	Nt	4	Putatively deregulated (located in topologically associated domains)
DDX56	76865589	76874946	Nt	4	Putatively deregulated (located in topologically associated domains)
NPC1L1	76889504	76912254	Nt	4	Putatively deregulated (located in topologically associated domains)
NUDCD3	76917098	76988105	Nt	4	Putatively deregulated (located in topologically associated domains)
CAMK2B	77025265	77117686	Nt	4	Putatively deregulated (located in topologically associated domains)
YKT6	77120960	77129830	Nt	4	Putatively deregulated (located in topologically associated domains)
PTPRD	36145265	36600302	Nt	8	Putatively deregulated (located in topologically associated domains)
DMAC1	37095276	37096906	Nt	8	Putatively deregulated (located in topologically associated domains)
KDM4C	37733103	38109966	Nt	8	Putatively deregulated (located in topologically associated domains)
ALPK2	57611636	57740561	Ou	24	Putatively deregulated (located in topologically associated domains)
MALT1	57775162	57839220	Ou	24	Putatively deregulated (located in topologically associated domains)
ZNF532	57933911	58044908	Ou	24	Putatively deregulated (located in topologically associated domains)
OACYL	58049671	58122019	Ou	24	Putatively deregulated (located in topologically associated domains)
SEC11C	58152176	58163481	Ou	24	Putatively deregulated (located in topologically associated domains)
GRP	58203516	58216348	Ou	24	Putatively deregulated (located in topologically associated domains)
RAX	58241200	58245331	Ou	24	Putatively deregulated (located in topologically associated domains)
CPLX4	58263769	58286282	Ou	24	Putatively deregulated (located in topologically associated domains)
LMAN1	58292452	58311500	Ou	24	Putatively deregulated (located in topologically associated domains)
CCBE1	58381338	58609120	Ou	24	Disrupted
PMAIP1	58744467	58747475	Ou	24	Deleted
MC4R	59163946	59165739	Ou	24	Deleted
CDH20	59887828	60100758	Ou	24	Deleted
RNF152	60310688	60311302	Ou	24	Deleted
PIGN	60492609	60601514	Ou	24	Deleted
RELCH	60601662	60714860	Ou	24	Deleted
TNFRSF11A	60733395	60790306	Ou	24	Deleted
ZCCHC2	60903462	60958117	Ou	24	Deleted
PHLPP1	61054481	61278037	Ou	24	Deleted
BCL2	61396513	61588241	Ou	24	Deleted
KDSR	61599658	61638727	Ou	24	Deleted
VPS4B	61648831	61686320	Ou	24	Deleted
SERPINB5	61700675	61754106	Ou	24	Deleted
SERPINB12	61796828	61818412	Ou	24	Deleted
SERPINB13	61826200	61838262	Ou	24	Deleted
SERPINB7	61992814	62015763	Ou	24	Deleted
SERPINB2	62075443	62093177	Ou	24	Deleted
SERPINB10	62099334	62122879	Ou	24	Deleted
PANX1	614967	671409	Ou	29	Deleted
HEPHL1	678610	770713	Ou	29	Deleted
VSTM5	974953	1003566	Ou	29	Deleted
MED17	1014403	1043535	Ou	29	Deleted
TAF1D	1080813	1086765	Ou	29	Deleted
CEP295	1091859	1138116	Ou	29	Deleted
SMCO4	1372285	1377857	Ou	29	Deleted
DEUP1	1403401	1549941	Ou	29	Deleted
SLC36A4	1701573	1743386	Ou	29	Deleted
MTNR1B	1901714	1916511	Ou	29	Deleted
FAT3	1996704	2635494	Ou	29	Deleted
CHORDC1	5050449	5072434	Ou	29	Putatively deregulated (located in topologically associated domains)
NAALAD2	5097620	5148929	Ou	29	Putatively deregulated (located in topologically associated domains)
TRIM64	5247502	5255571	Ou	29	Putatively deregulated (located in topologically associated domains)
FOLH1B	5885258	5958145	Ou	29	Putatively deregulated (located in topologically associated domains)
NOX4	6120515	6303004	Ou	29	Putatively deregulated (located in topologically associated domains)
TYR	6326407	6435488	Ou	29	Putatively deregulated (located in topologically associated domains)
GRM5	7007877	7197732	Ou	29	Putatively deregulated (located in topologically associated domains)
CTSC	7375472	7417234	Ou	29	Putatively deregulated (located in topologically associated domains)
RAB38	7501290	7566916	Ou	29	Putatively deregulated (located in topologically associated domains)
