# Supplementary material for: Large-scale detection and characterization of interchromosomal rearrangements in normozoospermic bulls using massive genotype and phenotype data sets
Source: PubMed Central journal article supplement — Genome Res. 2023 Jun;33(6):957–71. doi: 10.1101/gr.277787.123 (PMC10519396; doi:10.1101/gr.277787.123), 2023-06
Supplement: Supplemental_Tables1-4.pdf [file Supplemental_Tables1-4.pdf]

|                                                       | FA     | FE     | IM     | JA     | LE     | MA     | NT    | NO     | OB    | OU     | QU     | SA     |
|-------------------------------------------------------|--------|--------|--------|--------|--------|--------|-------|--------|-------|--------|--------|--------|
| Semen conception rate – 1 <sup>st</sup> AI on heifers | 22.6   | 22.2   | 39.1   | 29.2   | 28.3   | 26.8   | 48.2  | 43.8   | 58.6  | 31.3   | 29.2   | 31.9   |
| (points loss)                                         | (34.1) | (34.5) | (17.8) | (26.8) | (38.7) | (30.1) | (8.7) | (23.1) | (1.2) | (25.6) | (27.7) | (25.0) |
| n                                                     | 914    | 856    | 298    | 403    | 145    | 4,002  | 2,021 | 157    | 132   | 1,039  | 281    | 124    |
| Mortality rate of females in 1 <sup>st</sup> year     | 12.2   | 10.3   | 18.5   | 17.9   | NA     | 12.0   | 41.2  | NA     | 11.0  | 19.2   | 16.4   | 16.8   |
| n                                                     | 606    | 620    | 761    | 761    |        | 2,858  | 3,122 |        | 209   | 1,100  | 170    | 32     |

**Supplemental Table S1. Raw technical numbers for affected bulls.** Conception rate is the ratio [number of calving/number of inseminations] and progeny juvenile mortality rate is [number of females that died before 366 days/number of females born].

| Breed              | Number of bulls with >30 genomic tests | Number of bulls [1:30] tests | Average number of genomic test per bull with $\geq 30$ genomic tests | Average number of genomic test per bull | Maximum number of genomic tests per bull | Number of rearrangements found |
|--------------------|----------------------------------------|------------------------------|----------------------------------------------------------------------|-----------------------------------------|------------------------------------------|--------------------------------|
| Abondance          | 71                                     | 351                          | 91 ± 50                                                              | 34 ± 49                                 | 235                                      | 1                              |
| Aubrac             | 10                                     | 2149                         | 44 ± 18                                                              | 3 ± 4                                   | 87                                       | 0                              |
| Jersey             | 50                                     | 236                          | 92 ± 62                                                              | 21 ± 42                                 | 287                                      | 0                              |
| Brown Swiss        | 119                                    | 456                          | 101 ± 112                                                            | 26 ± 4                                  | 879                                      | 0                              |
| Salers             | 1                                      | 994                          | 44                                                                   | 2 ± 3                                   | 44                                       | 0                              |
| Tarentaise         | 121                                    | 211                          | 60 ± 25                                                              | 28 ± 30                                 | 169                                      | 0                              |
| Limousine          | 46                                     | 1607                         | 55 ± 40                                                              | 5 ± 12                                  | 202                                      | 0                              |
| Simmental          | 67                                     | 545                          | 66 ± 44                                                              | 12 ± 25                                 | 224                                      | 0                              |
| Charolaise         | 245                                    | 4197                         | 147 ± 167                                                            | 11 ± 51                                 | 1420                                     | 2                              |
| Montbéliarde       | 1270                                   | 2985                         | 374 ± 618                                                            | 115 ± 378                               | 7141                                     | 0                              |
| Normande           | 653                                    | 995                          | 216 ± 254                                                            | 90 ± 190                                | 2081                                     | 1                              |
| Vosgienne          | 50                                     | 83                           | 82 ± 52                                                              | 34 ± 49                                 | 239                                      | 0                              |
| Holstein           | 2635                                   | 6687                         | 332 ± 629                                                            | 98 ± 365                                | 12676                                    | 8                              |
| Parthenaise        | 15                                     | 1040                         | 53 ± 38                                                              | 4 ± 8                                   | 183                                      | 0                              |
| Blonde d'Aquitaine | 118                                    | 3015                         | 95 ± 83                                                              | 7 ± 24                                  | 417                                      | 0                              |

**Supplemental Table S2. Number of eligible bull cohorts per breed.**

| IR            | Breakpoints   | Number of genotyped progeny | Distance between markers considered (bp) ± 10% | LD breakpoint regions | LD in affected chromosome | Percentile in the non-affected chromosomes |
|---------------|---------------|-----------------------------|------------------------------------------------|-----------------------|---------------------------|--------------------------------------------|
| t(5;28)       | 5:74,392,480  | 2,388                       | 729,336                                        | 0.989                 | 65                        | 71                                         |
|               | 28:2,572,390  |                             | 222,160                                        | 1.000                 | 99                        | 97                                         |
| t(1;11)       | 1:128,820,480 | 385                         | 755,342                                        | 0.974                 | 24                        | 28                                         |
|               | 11:77,103,600 |                             | 170,519                                        | 0.995                 | 54                        | 55                                         |
| t(19;23)      | 19:56,469,708 | 463                         | 160,471                                        | 0.996                 | 34                        | 21                                         |
|               | 23:9,681,314  |                             | 482,602                                        | 1.000                 | 87                        | 82                                         |
| t(3;8)        | 3:69,934,840  | 403                         | 452,802                                        | 0.980                 | 29                        | 28                                         |
|               | 3:71,854,170  |                             | 835,682                                        | 0.950                 | 9                         | 10                                         |
|               | 8:23,449,820  |                             | 635,054                                        | 0.990                 | 65                        | 75                                         |
| Ins inv (8;4) | 4:65,642,810  | 12,600                      | 18,908,818                                     | 0.703                 | 85                        | 82                                         |
|               | 4:76,557,790  |                             | 593,292                                        | 0.978                 | 18                        | 31                                         |
|               | 8:37,638,710  |                             | 608,545                                        | 0.995                 | 99                        | 98                                         |

**Supplemental Table S3. Analysis of linkage disequilibrium around breakpoints.** LD is calculated among the descendants of male ancestors which produced mutant sperm responsible for five IR.

| IR              | Breakpoint    | Repeated element |
|-----------------|---------------|------------------|
| t(1;11)         | 1:128,820,473 | -                |
|                 | 11:77,103,578 | LTR (MLT1E3)     |
| t(2;22)         | 2:60,476,739  | LINE (L1_Art)    |
|                 | 22            |                  |
| t(3;8)          | 3:69,934,841  |                  |
|                 | 3:71,854,170  | LINE (BovB)      |
|                 | 8:23,449,818  | -                |
| Inv ins(4;8)    | 4:65,642,811  | -                |
|                 | 4:76,557,774  | LINE (BovB)      |
|                 | 8:37,638,713  | -                |
| t(5;28)         | 5:74,392,477  | LTR (LTR16E2)    |
|                 | 28:2,572,389  | -                |
| t(19;23)        | 19:56,469,708 | -                |
|                 | 23:9,681,291  | LINE (L1MEg)     |
| t(24;29),-der29 | 24:58,418,701 | -                |
|                 | 29:3,257,559  | -                |

**Supplemental Table S4. Analysis of repeated elements including a breakpoint.** In 6 bull, one of the breakpoint was located in repeated element.
